# Supplementary material for: The BCL-2 inhibitor ABT-199/venetoclax synergizes with proteasome inhibition via transactivation of the MCL-1 antagonist NOXA
Source: PubMed Central journal article supplement (PMC9021261; doi:10.1038/s41420-022-01009-1), 2022-04-20

Originalbilder Manuskript

Fig. 1 D  
SW982/WT

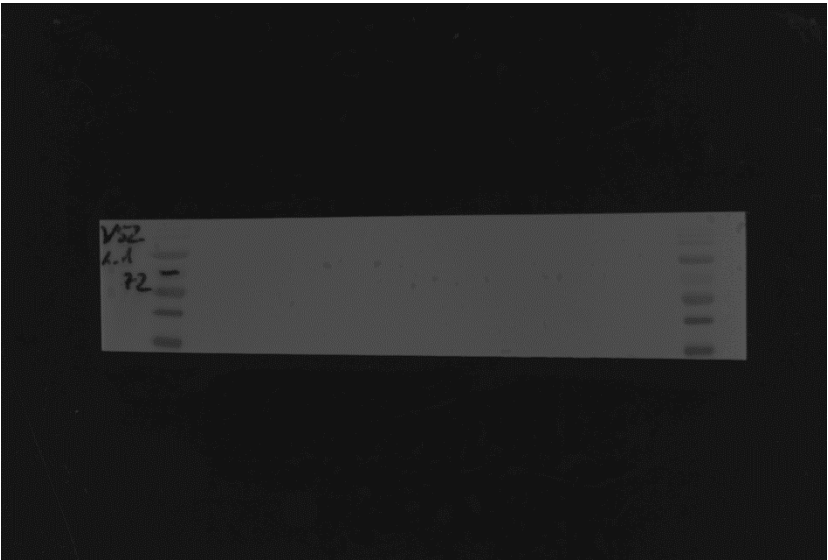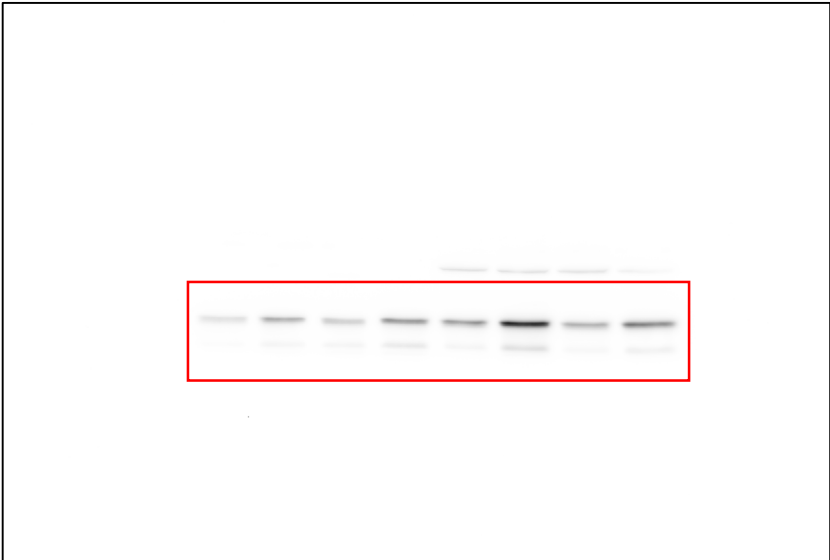

MCL-1

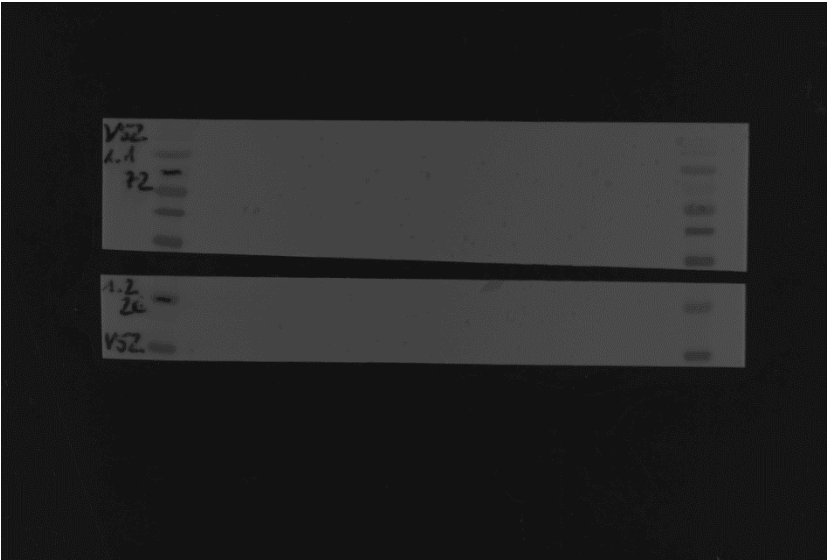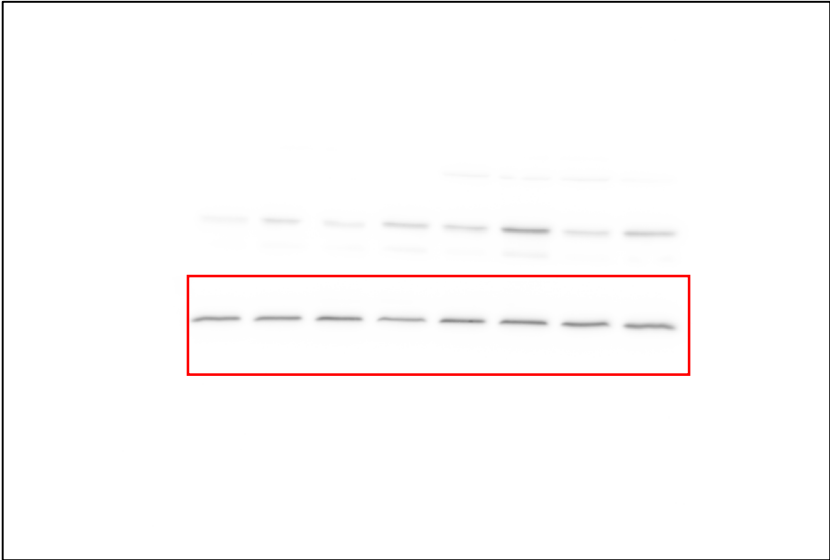

BAX

Fig. 1 D  
SW982/WT

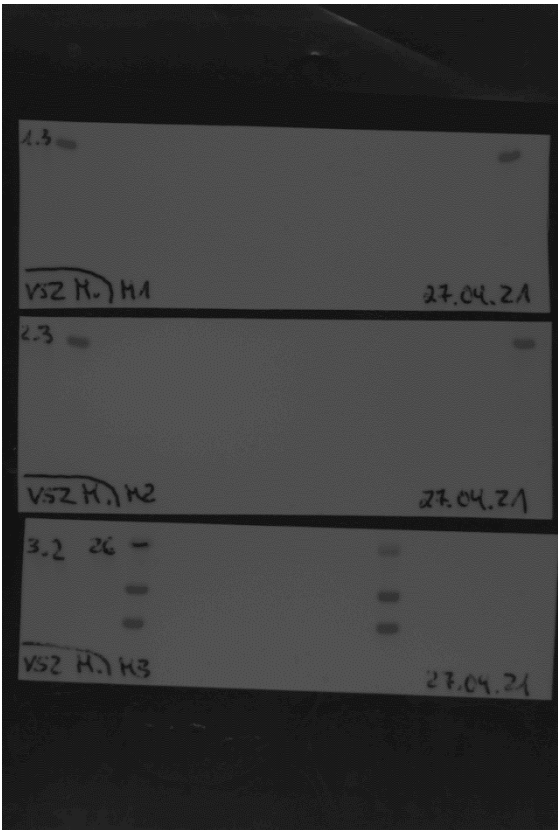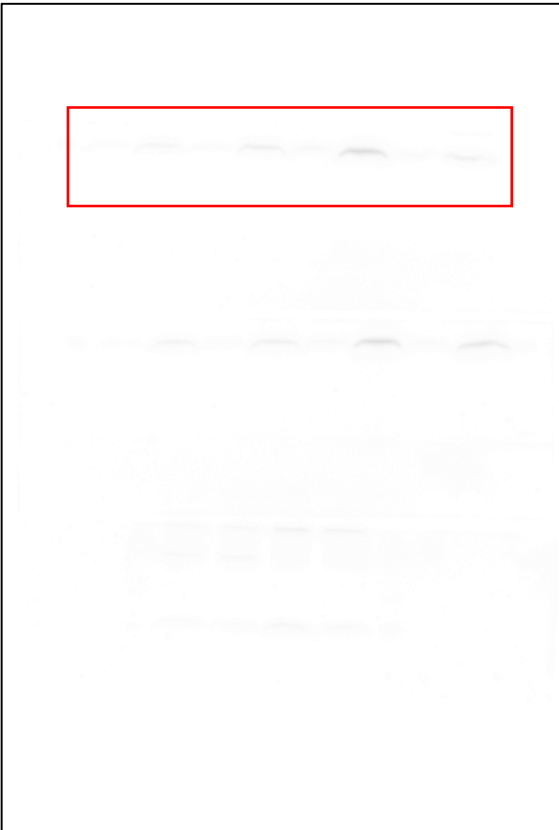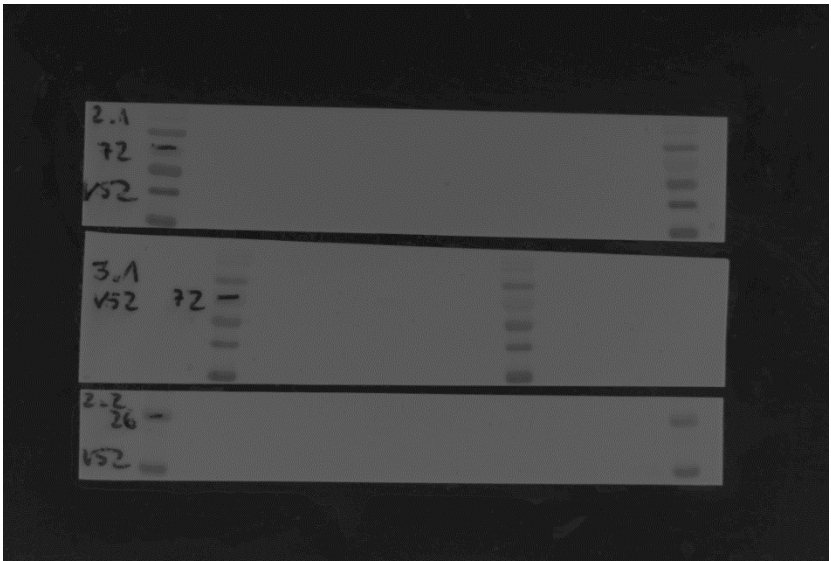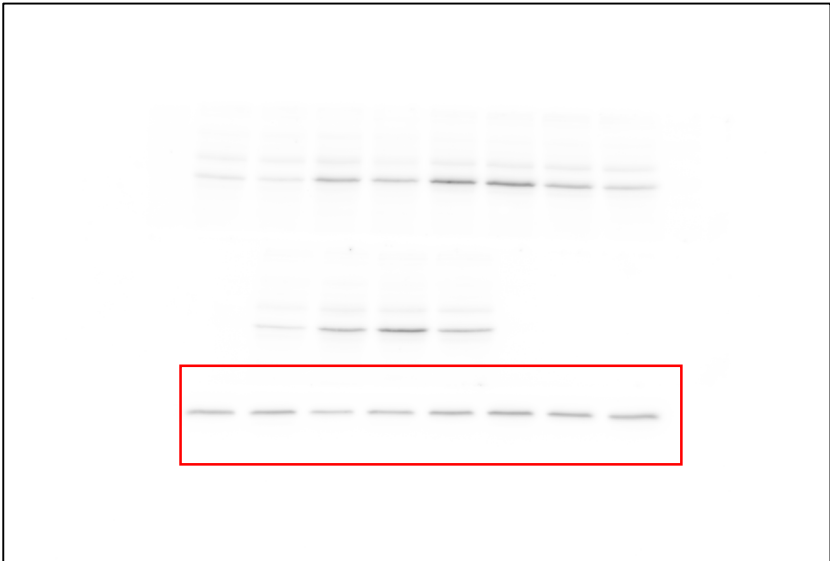

Fig. 1 D  
SW982/WT

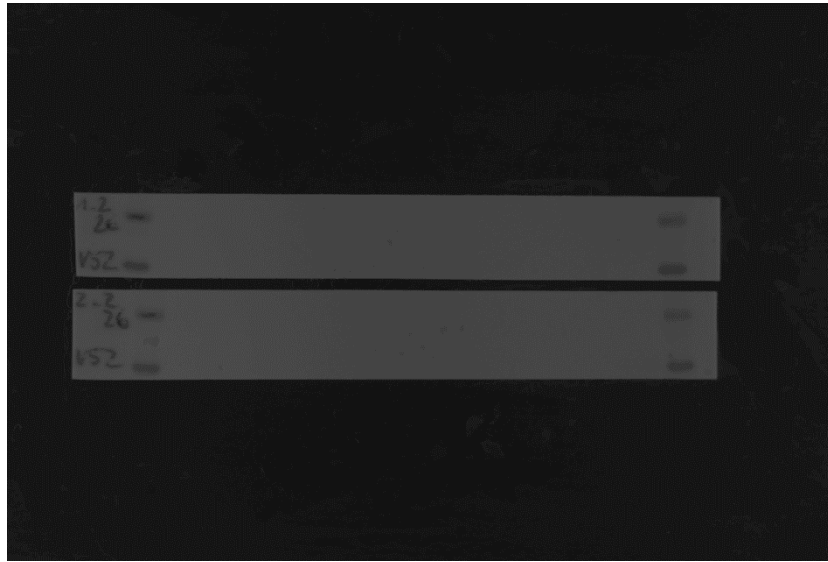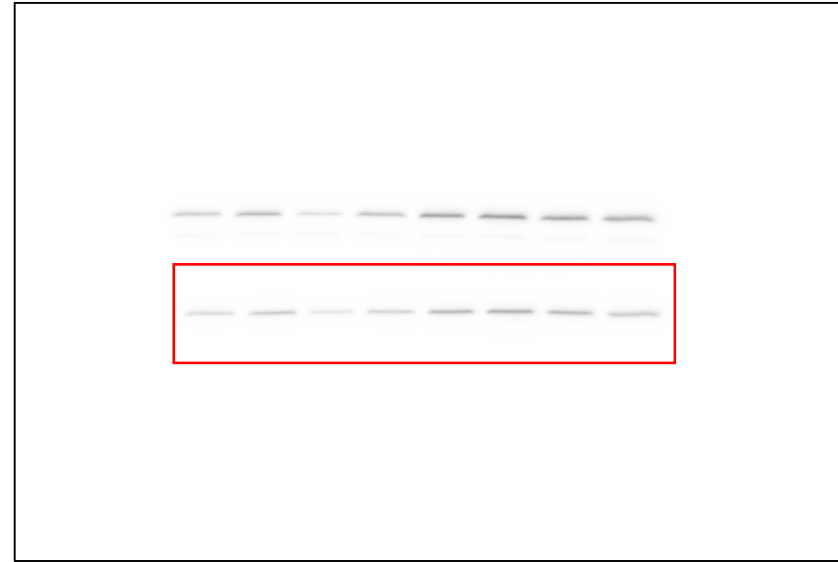

BAK

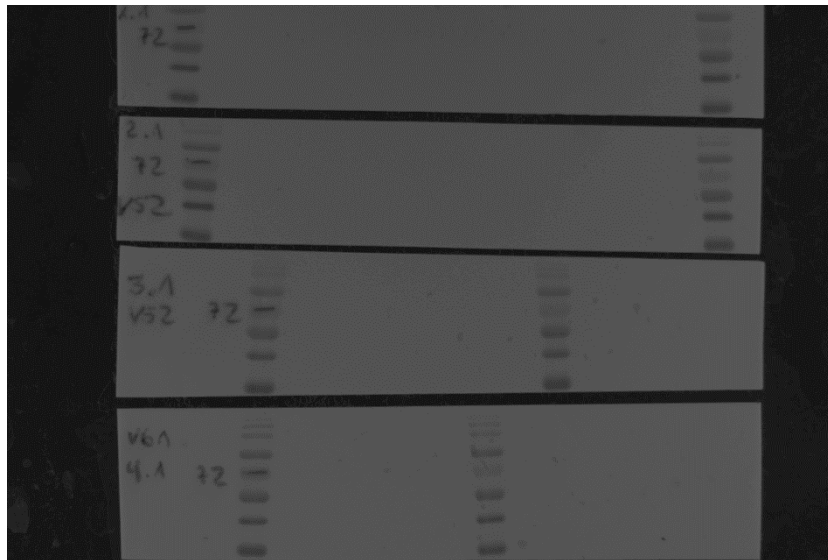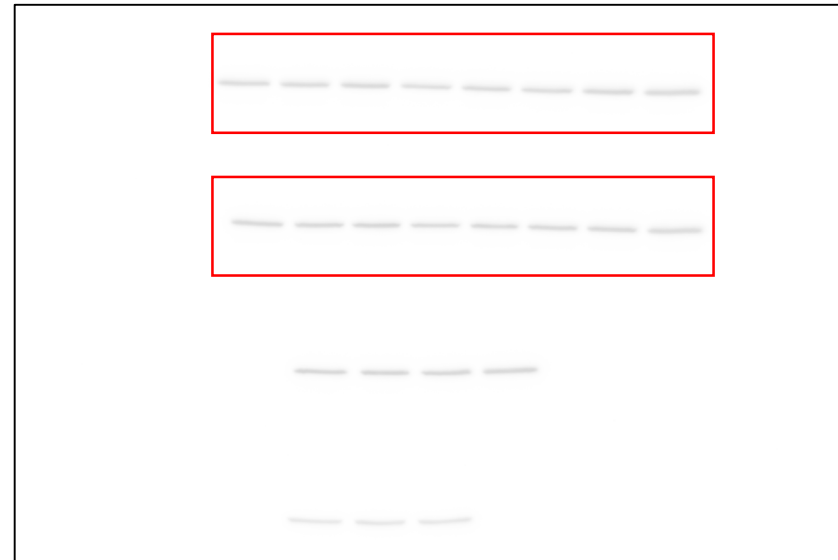

GAPDH

GAPDH\*

Fig. 1 D

SW982/BAK<sup>KO</sup>  
SW982/BAX<sup>KO</sup>

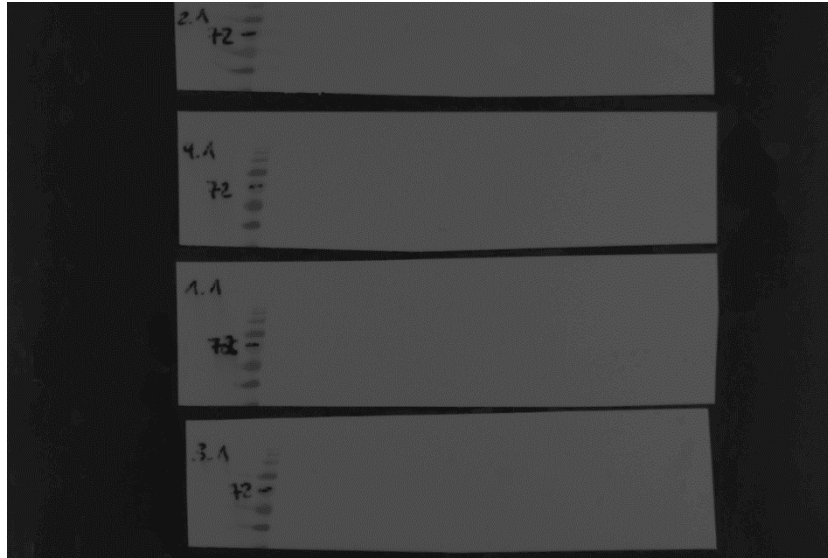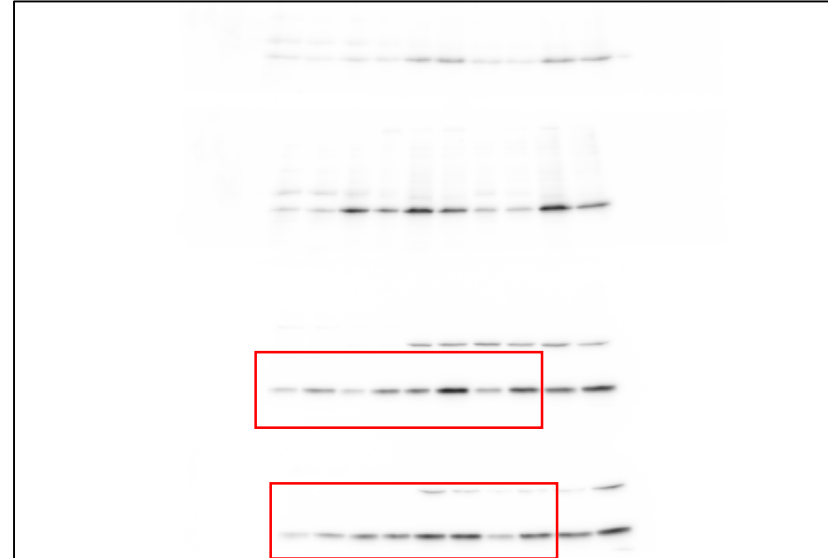

MCL-1 (SW982/BAK<sup>KO</sup>)

MCL-1 (SW982/BAK<sup>KO</sup>)

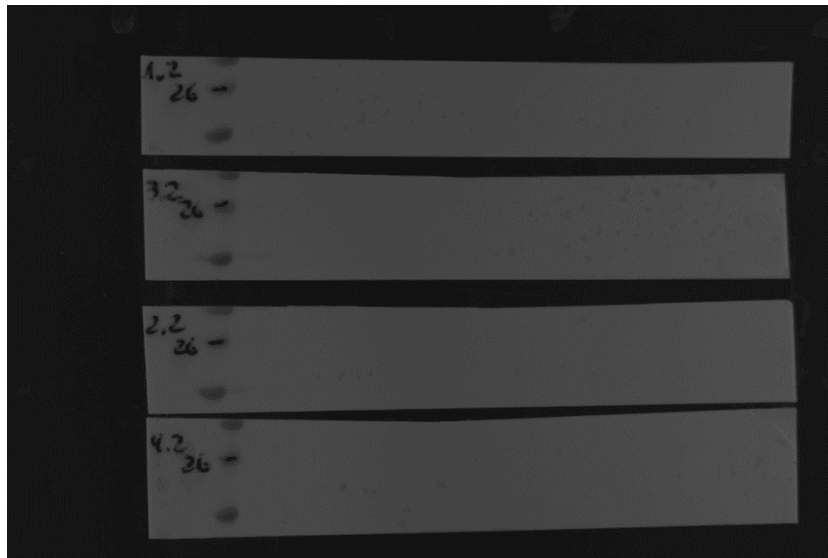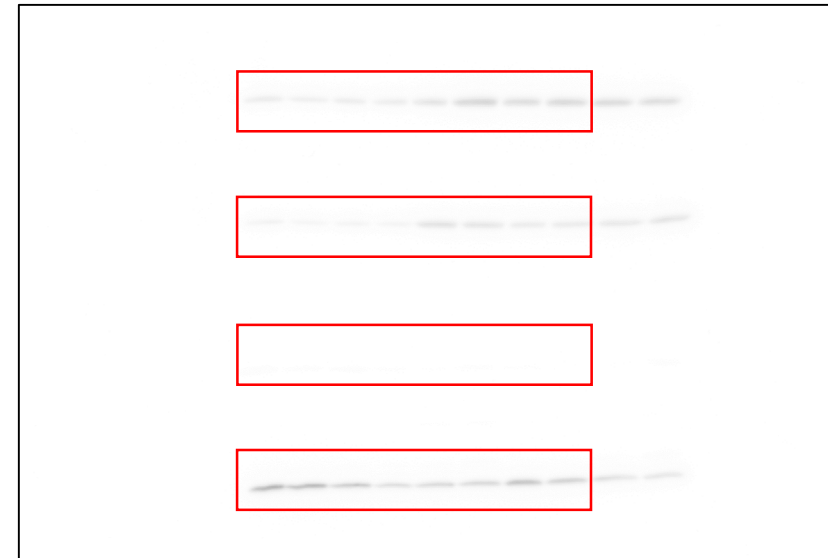

BOK (SW982/BAK<sup>KO</sup>)

BOK (SW982/BAK<sup>KO</sup>)

BAX (SW982/BAK<sup>KO</sup>)

BAX (SW982/BAK<sup>KO</sup>)

Fig. 1 D  
SW982/BAK<sup>KO</sup>  
SW982/BAX<sup>KO</sup>

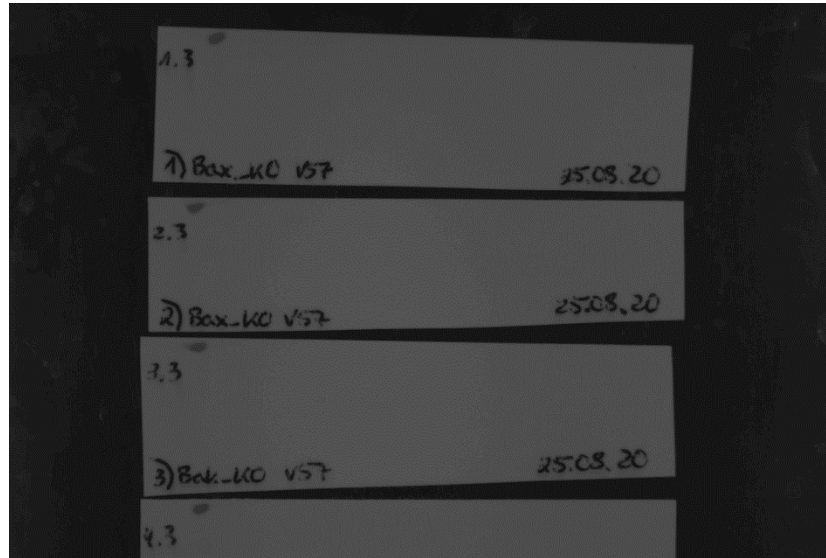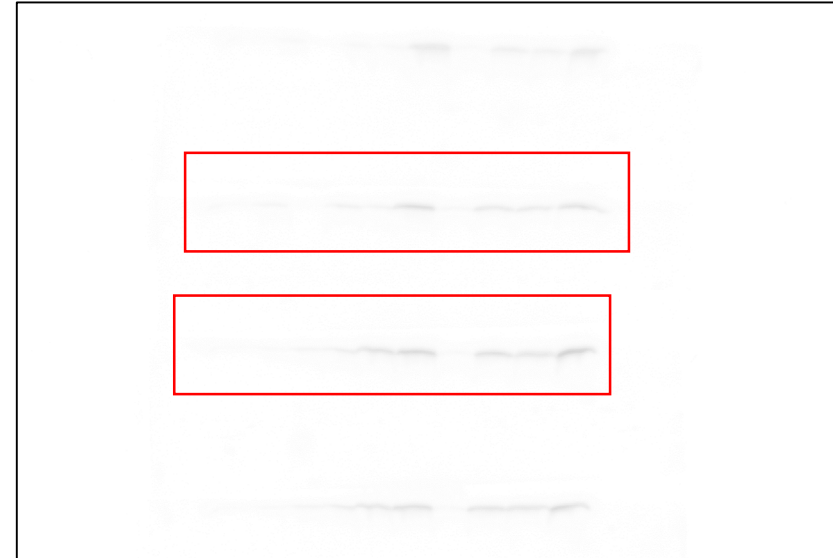

NOXA (SW982/BAK<sup>KO</sup>)

NOXA (SW982/BAX<sup>KO</sup>)

Fig. 1 D

SW982/BAK<sup>KO</sup>

SW982/BAX<sup>KO</sup>

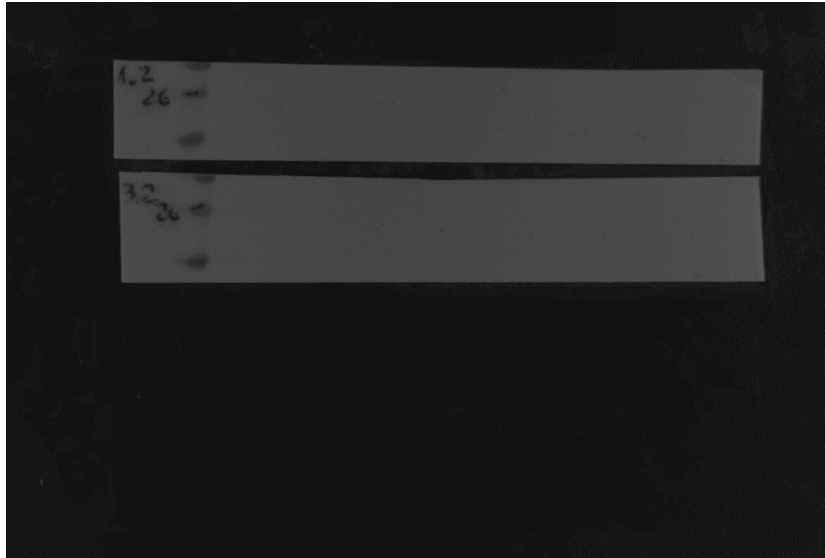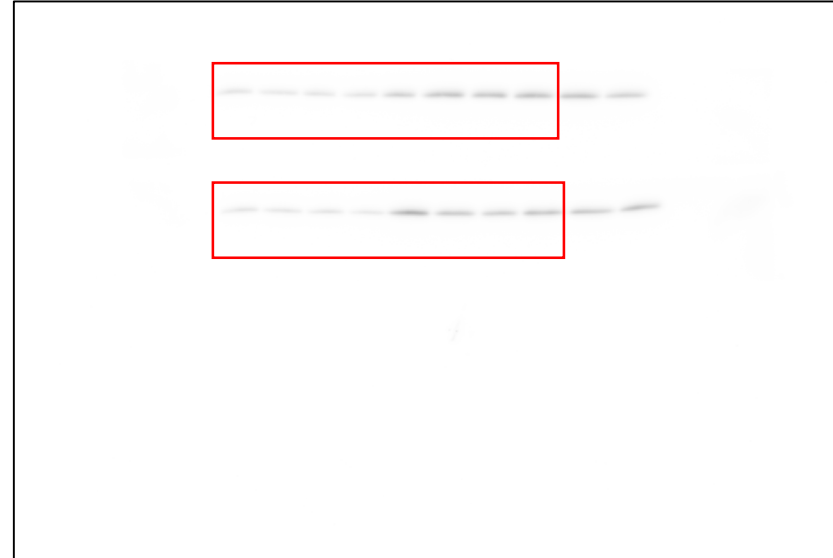

BCL-2 (SW982/BAK<sup>KO</sup>)

BCL-2 (SW982/BAK<sup>KO</sup>)

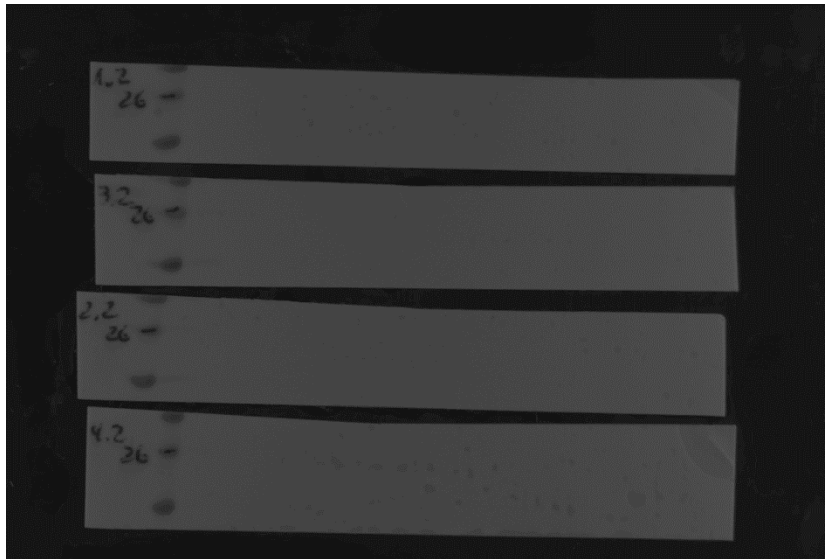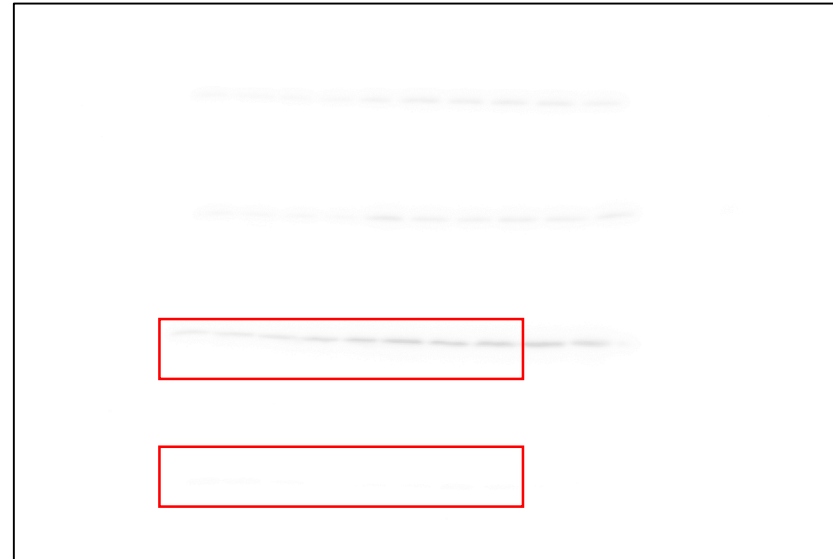

BAK (SW982/BAX<sup>KO</sup>)

BAK (SW982/BAX<sup>KO</sup>)

Fig. 1 D

SW982/BAK<sup>KO</sup>

SW982/BAX<sup>KO</sup>

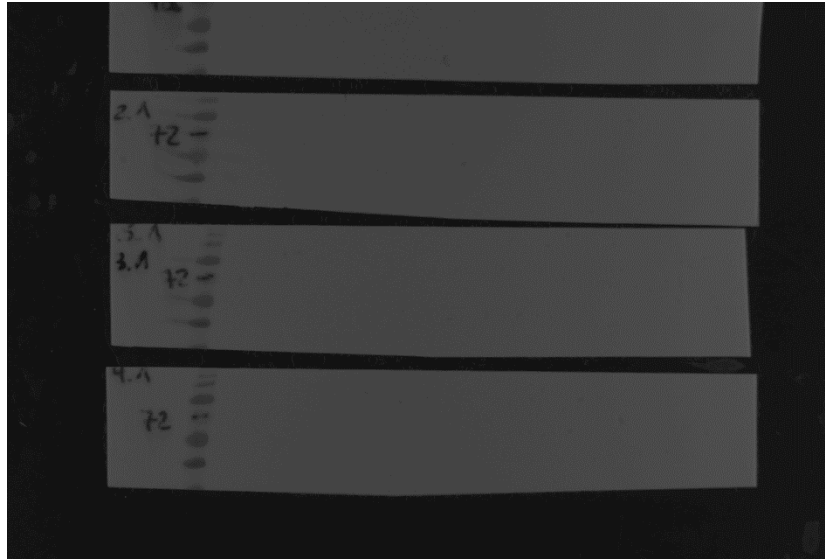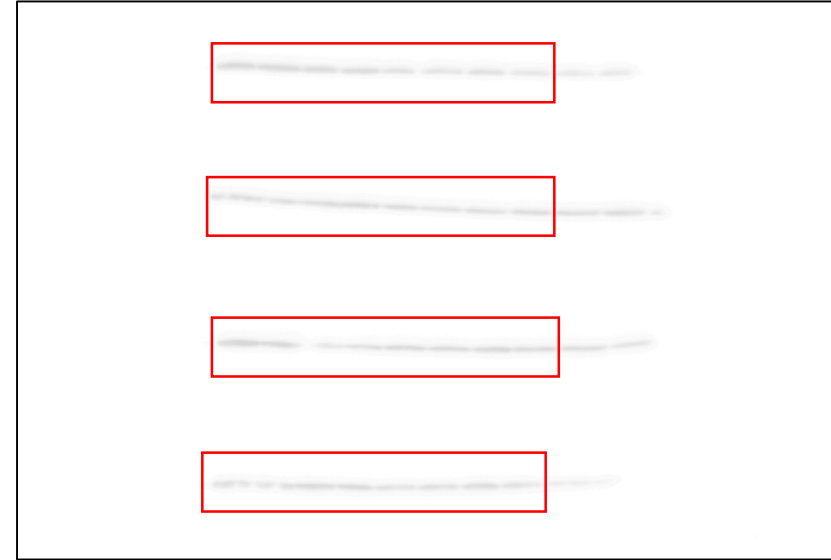

GADPH\* (SW982/BAX<sup>KO</sup>)

GADPH\*\* (SW982/BAX<sup>KO</sup>)

GAPDH (SW982/BAK<sup>KO</sup>)

GAPDH\* (SW982/BAK<sup>KO</sup>)



Fig. 2 G-I  
SW982/NOXA<sup>KD</sup>

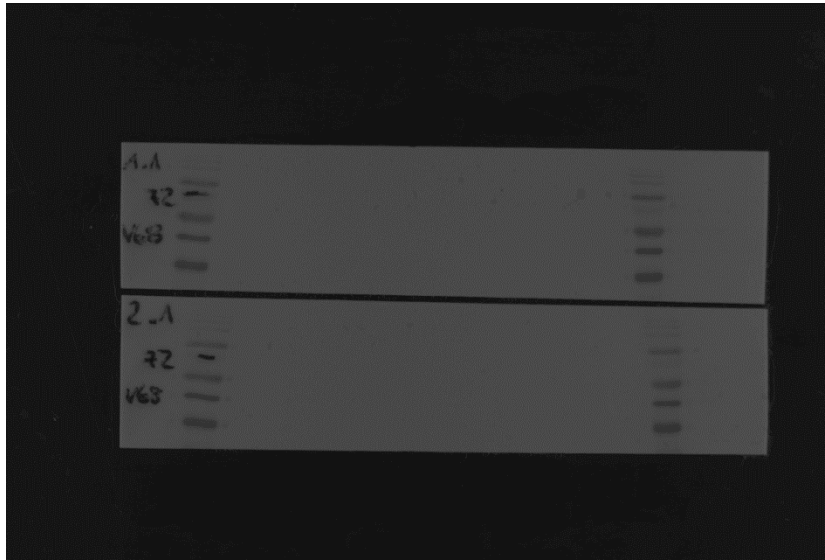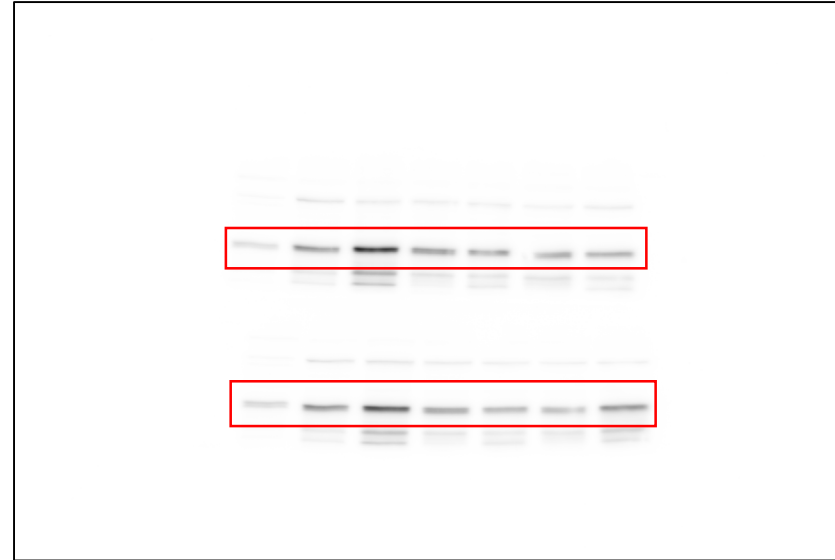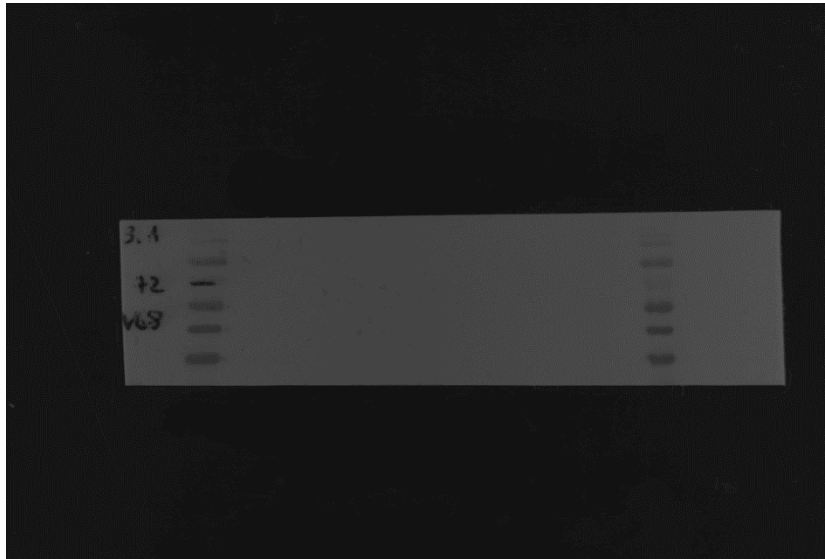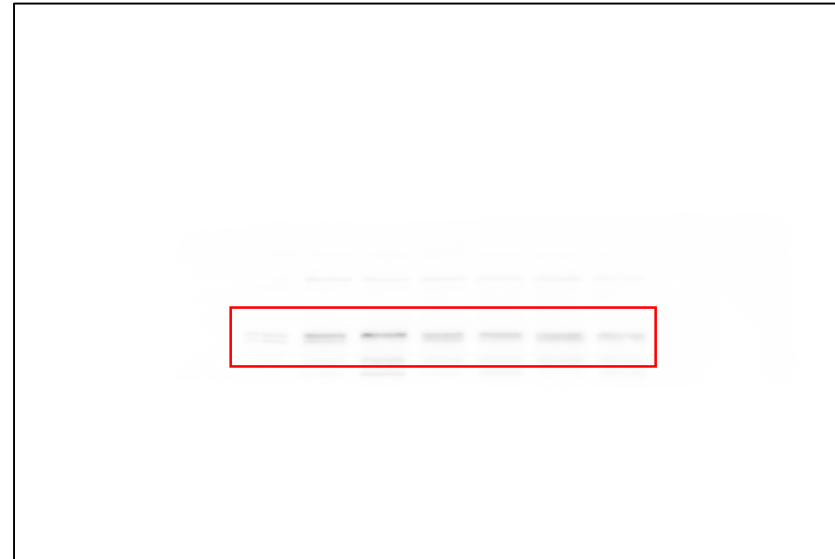

Fig. 2 G-I  
SW982/NOXA<sup>KD</sup>

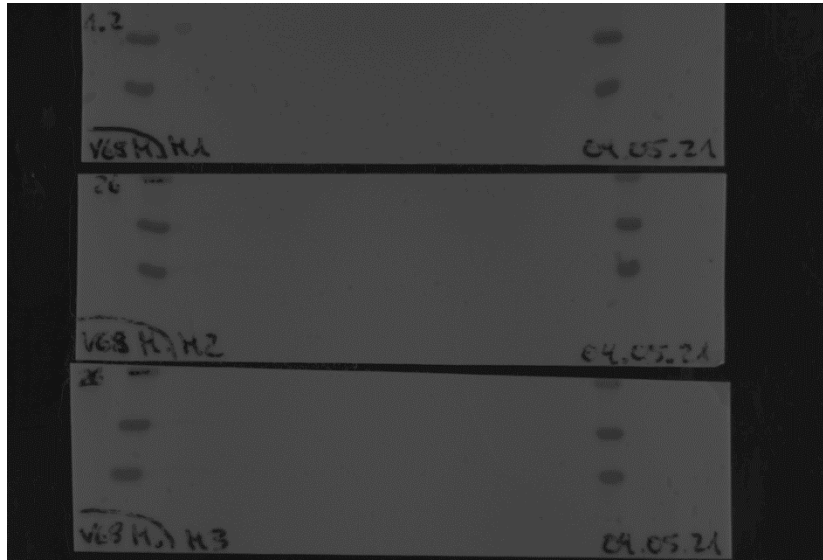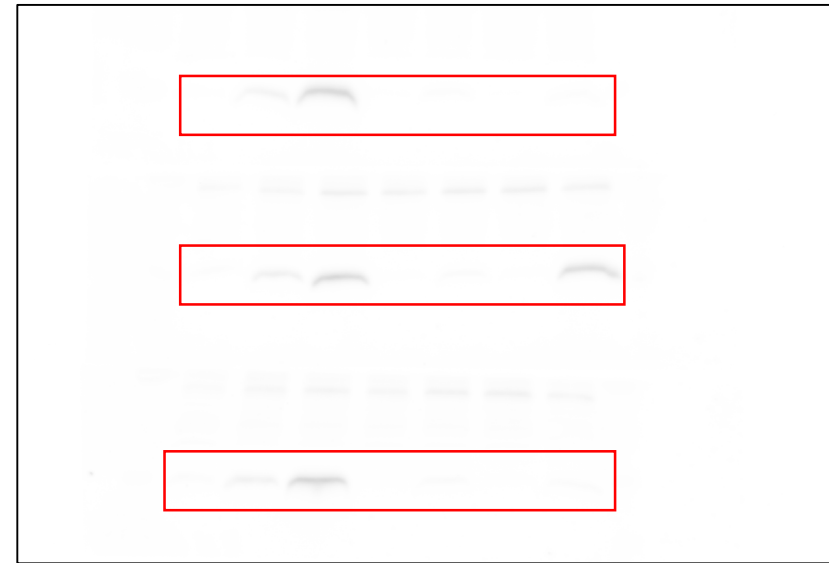

NOXA (Fig. 2 G)

NOXA (Fig. 2 H)

NOXA (Fig. 2 I)

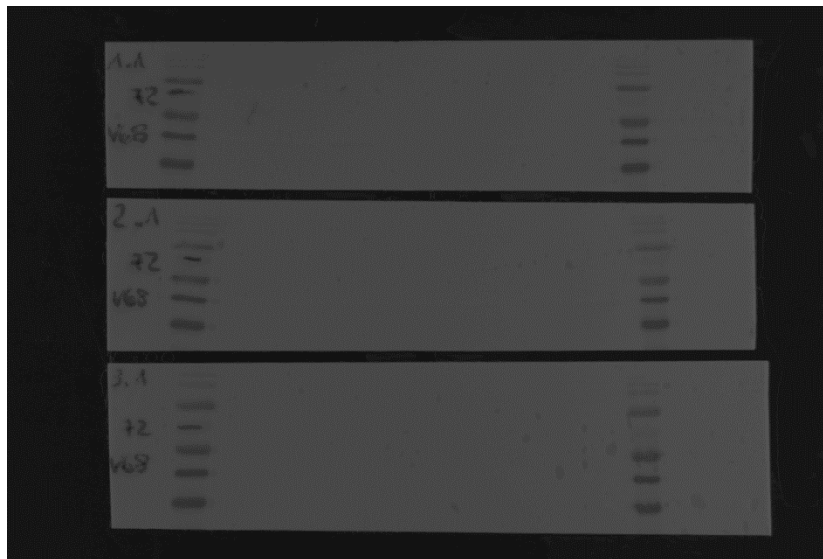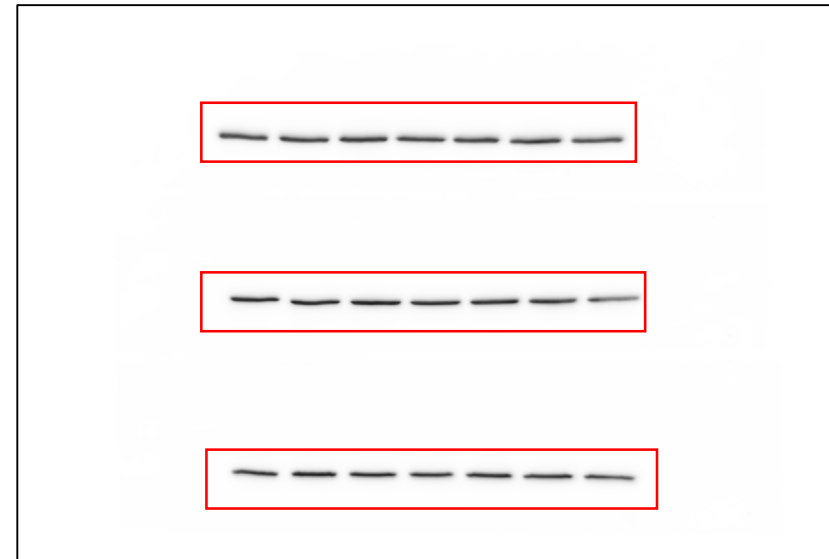

$\beta$ -ACTIN (Fig. 2 G)

$\beta$ -ACTIN (Fig. 2 H)

$\beta$ -ACTIN (Fig. 2 I)

Fig. 3 A  
SW982/WT

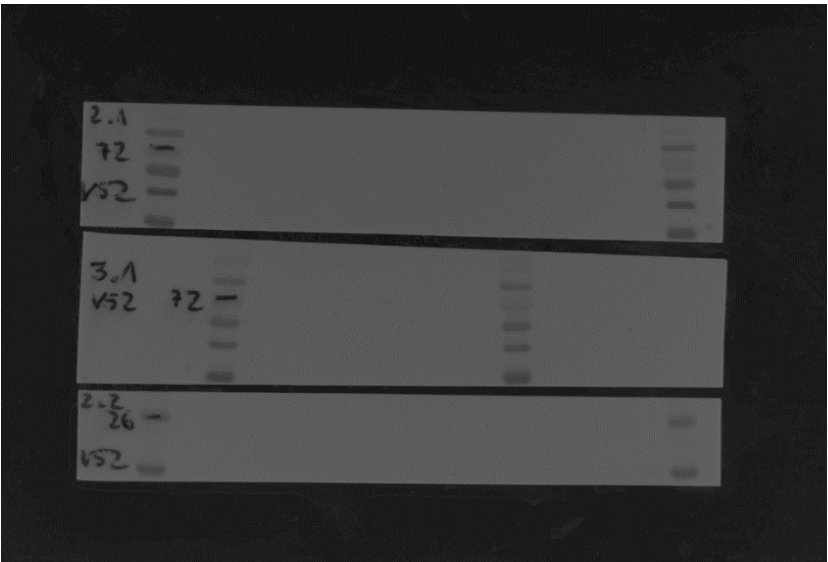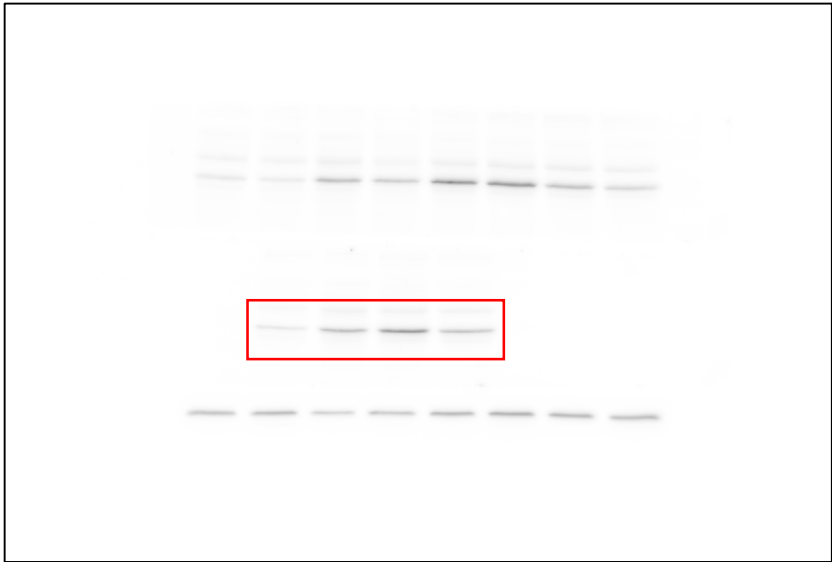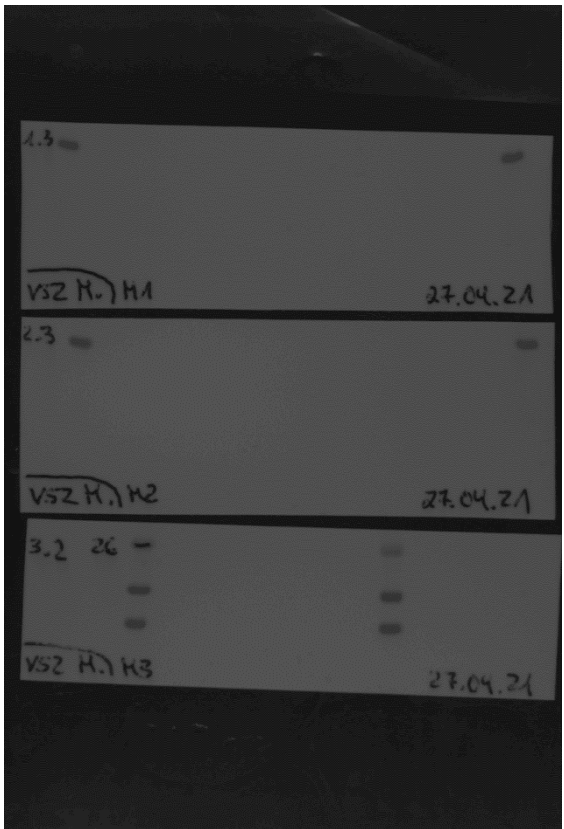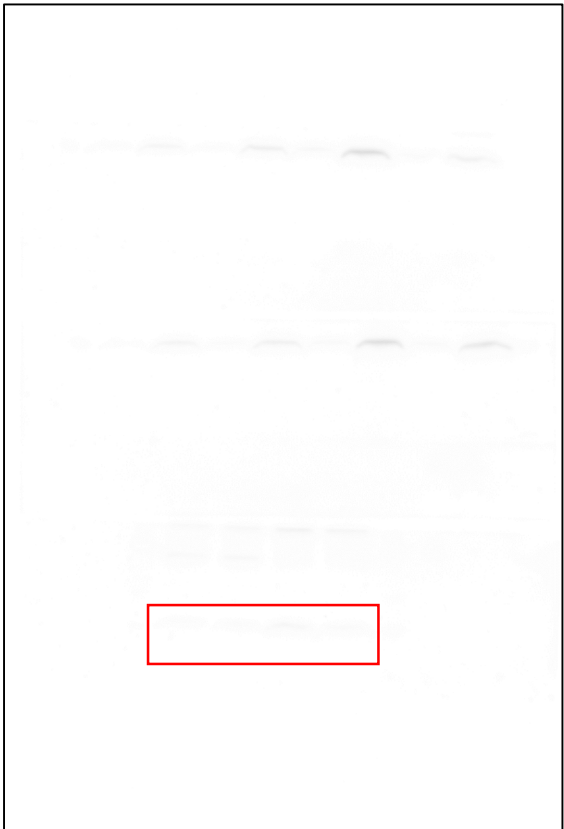

Fig. 3 A  
SW982/WT

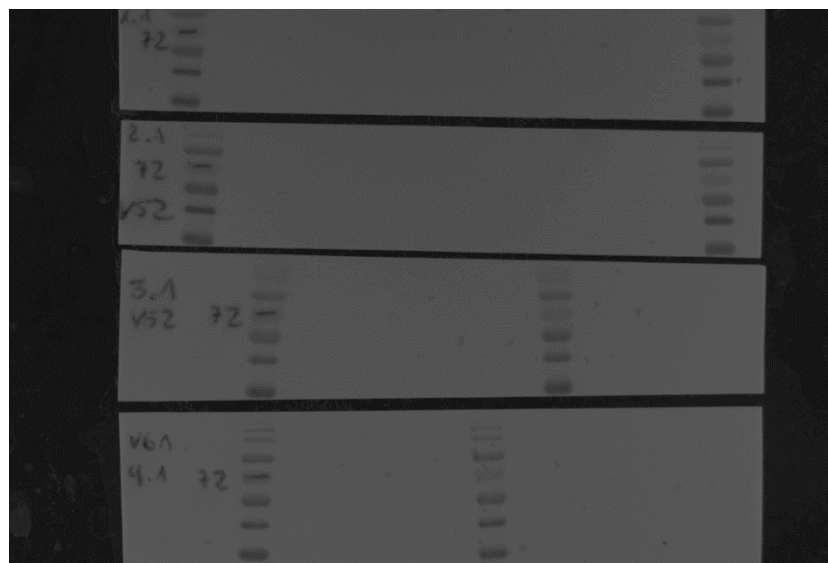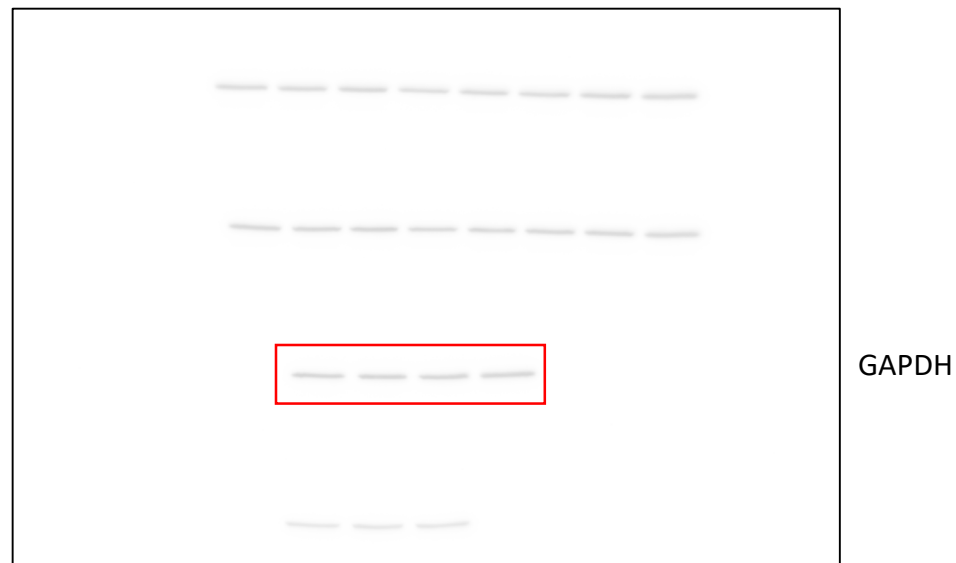

Fig. 3 C  
SW982/WT

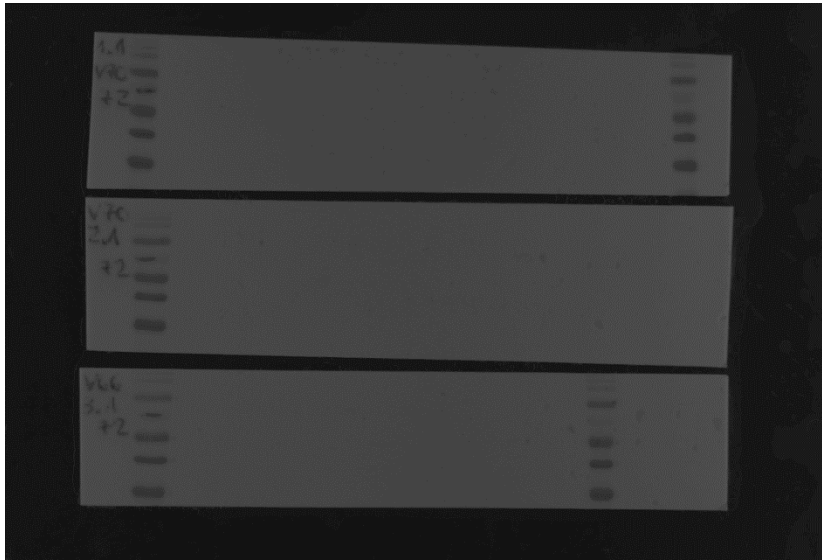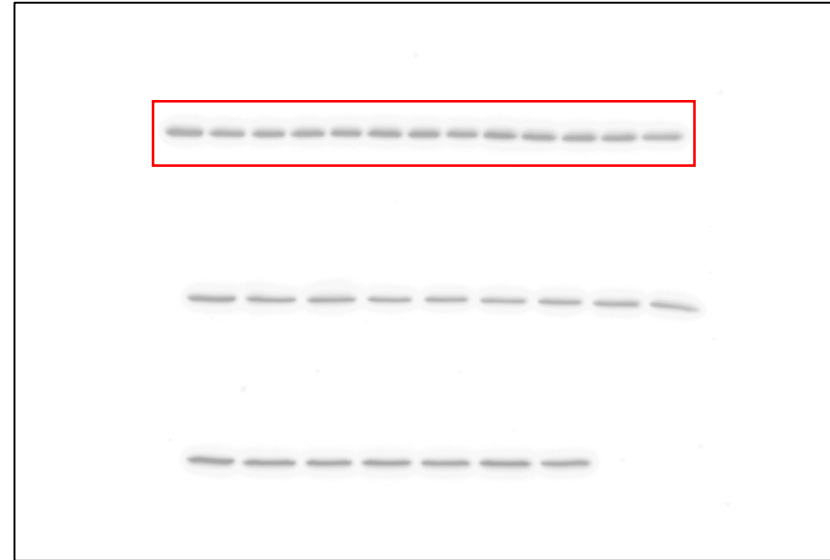

β-ACTIN

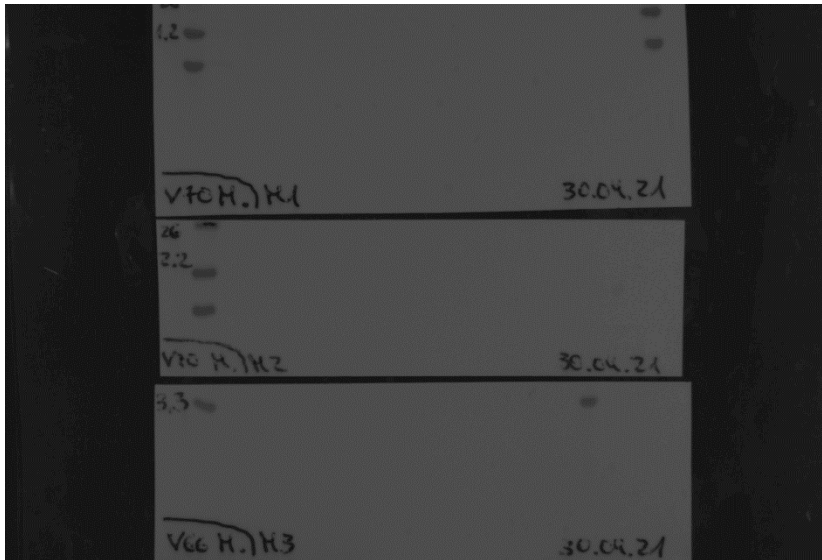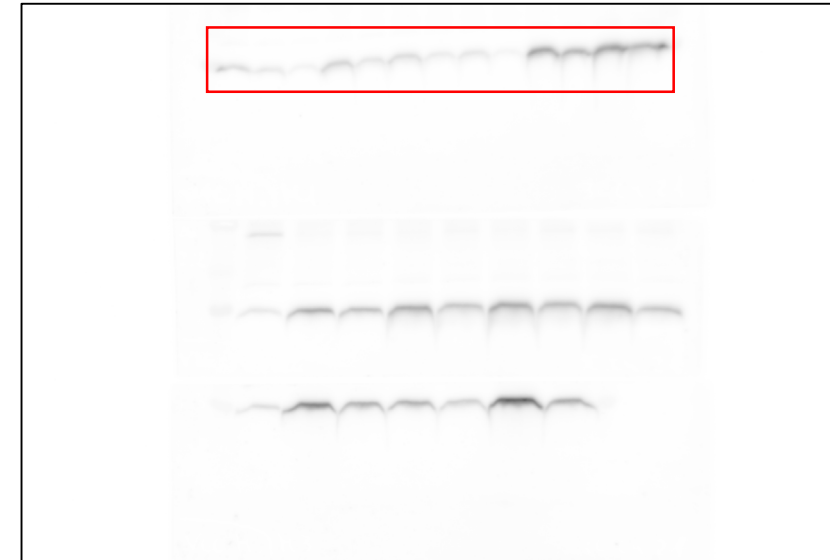

NOXA

Fig. 3 C  
SW982/WT

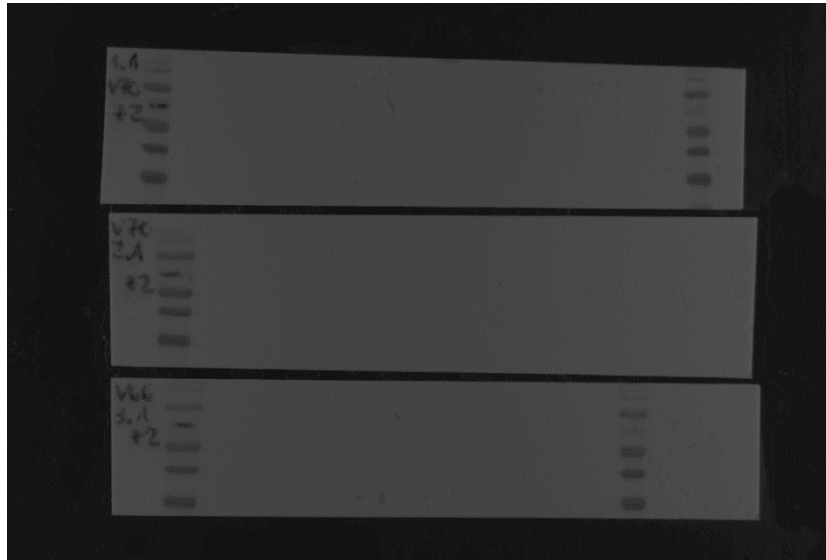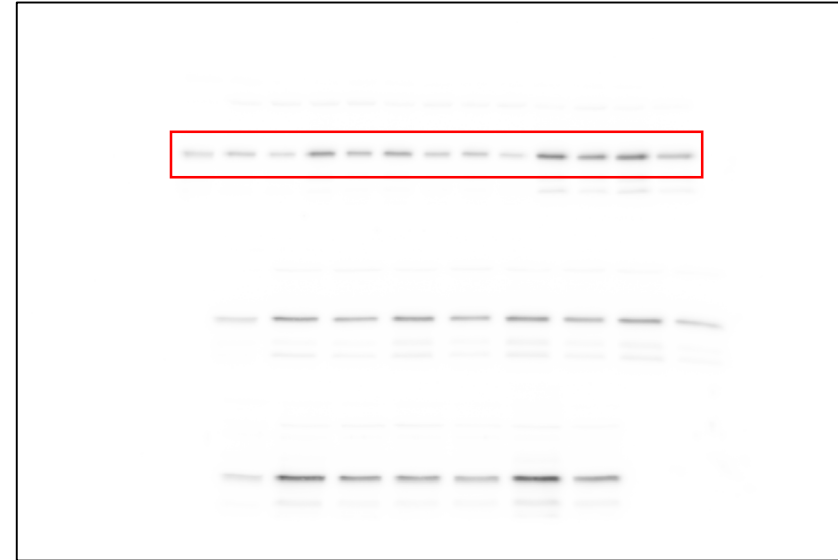

MCL-1

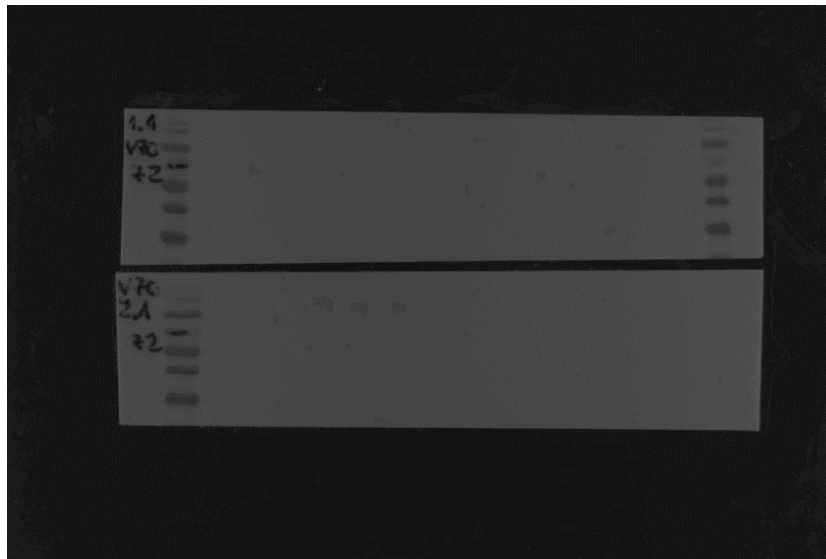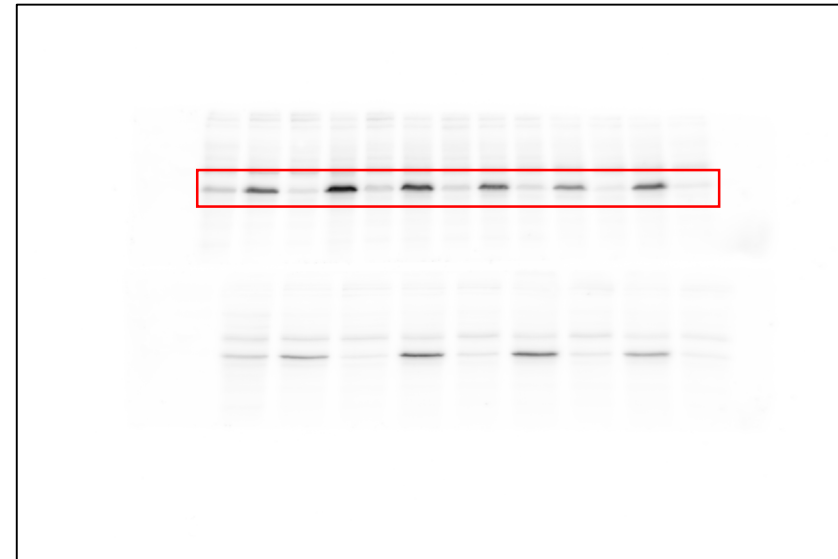

TP53

Fig. 3 D

SW982/WT

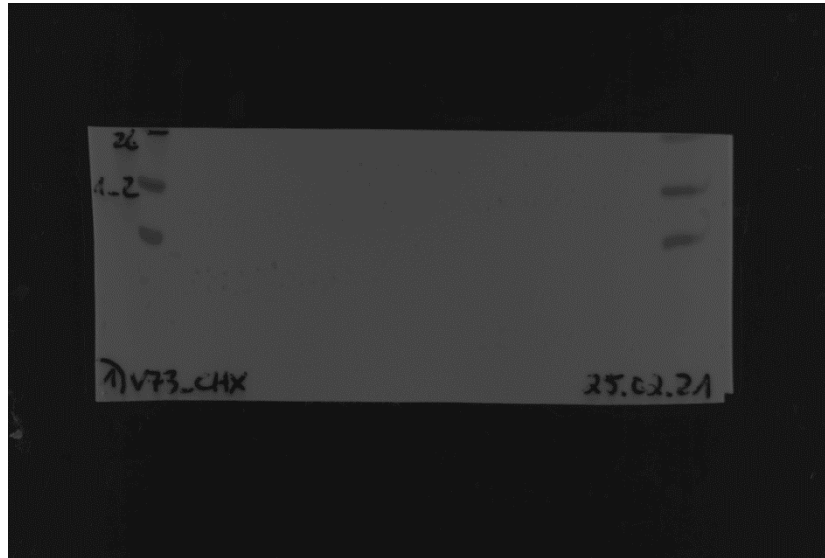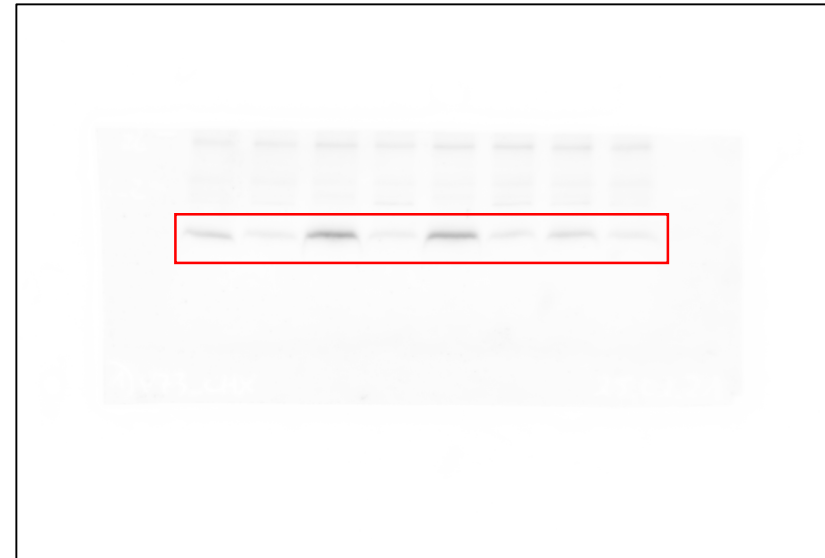

NOXA

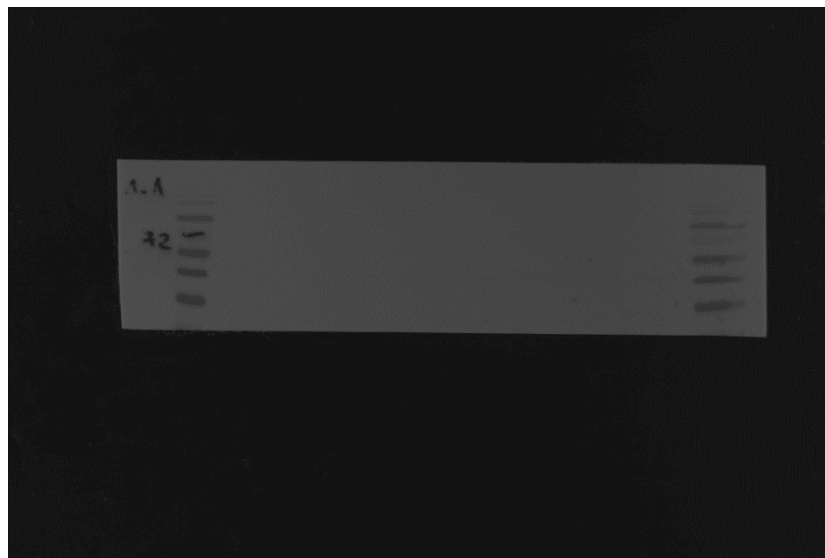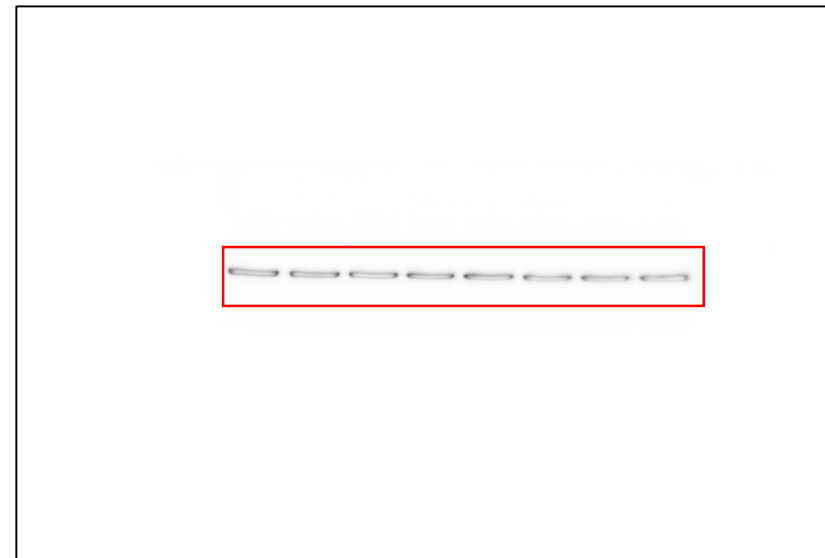

$\beta$ -ACTIN

Fig. 3 D  
SW982/WT

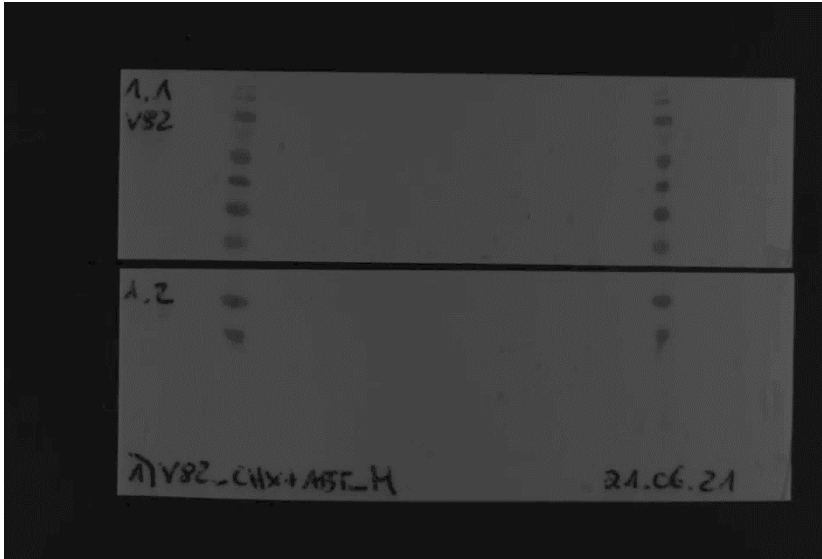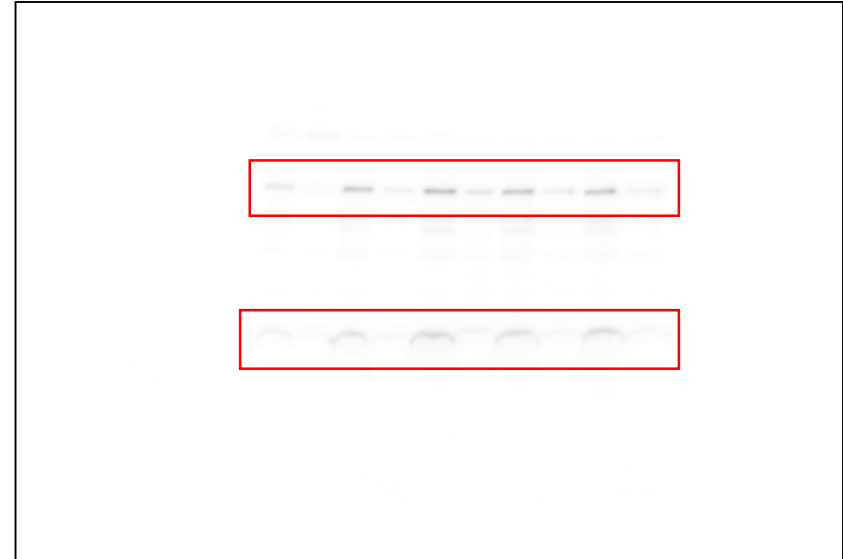

MCL-1

NOXA

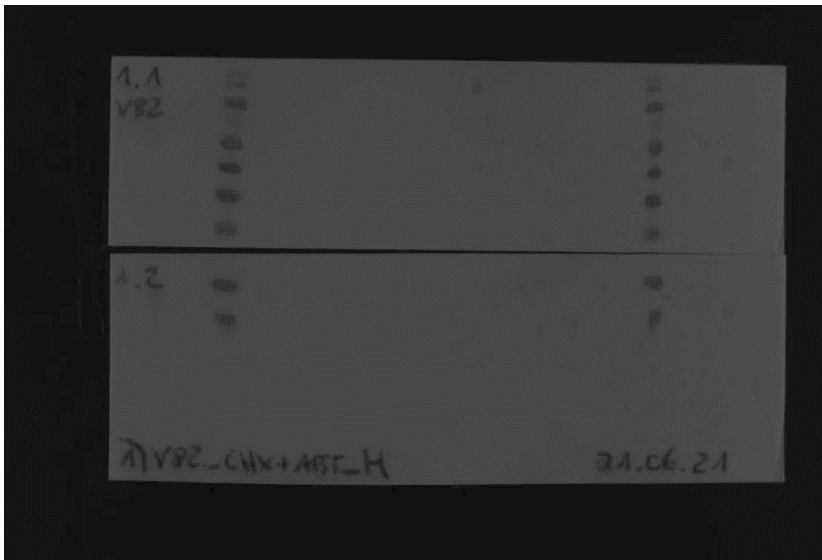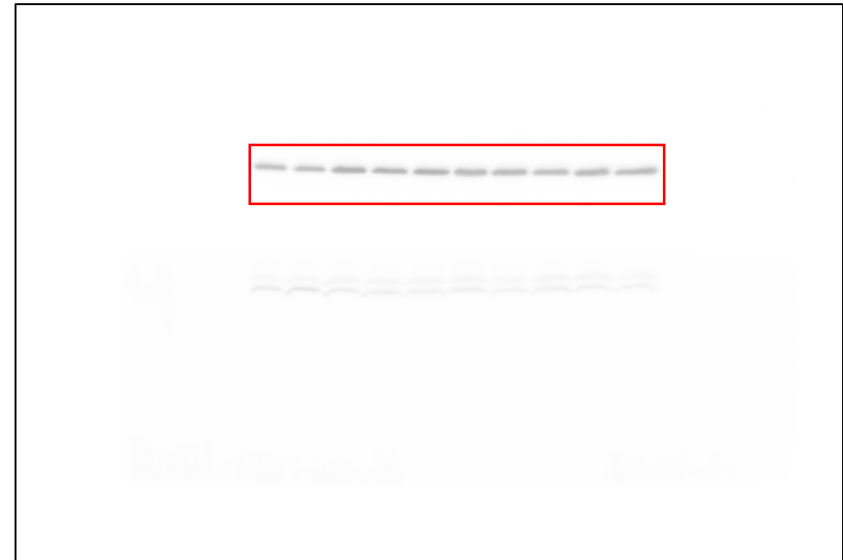

$\beta$ -ACTIN



Fig. 3 E  
SW982/WT

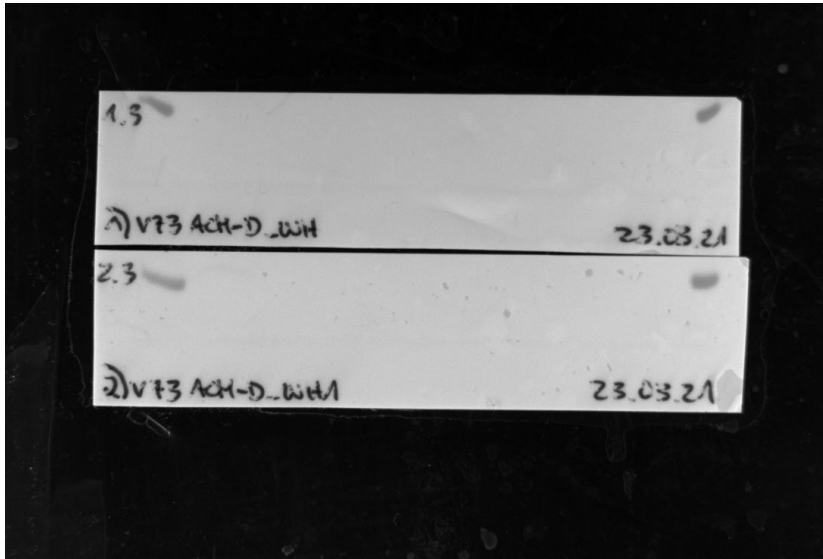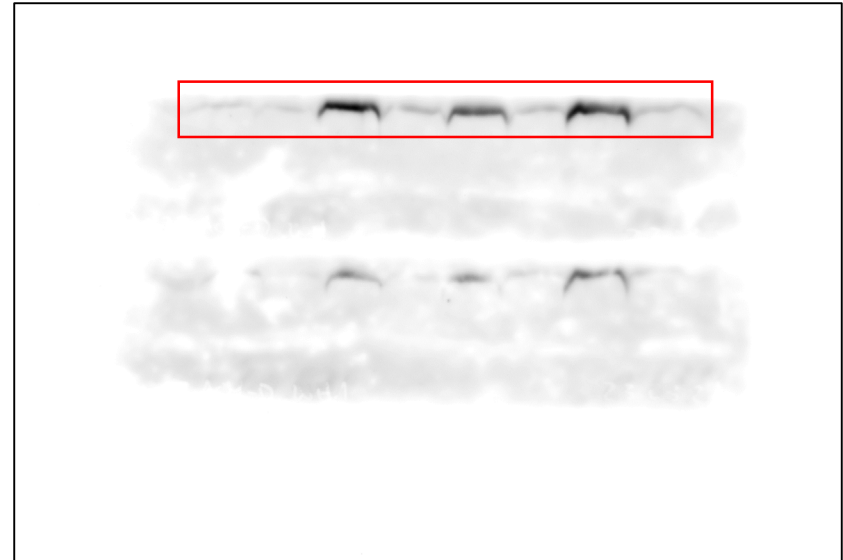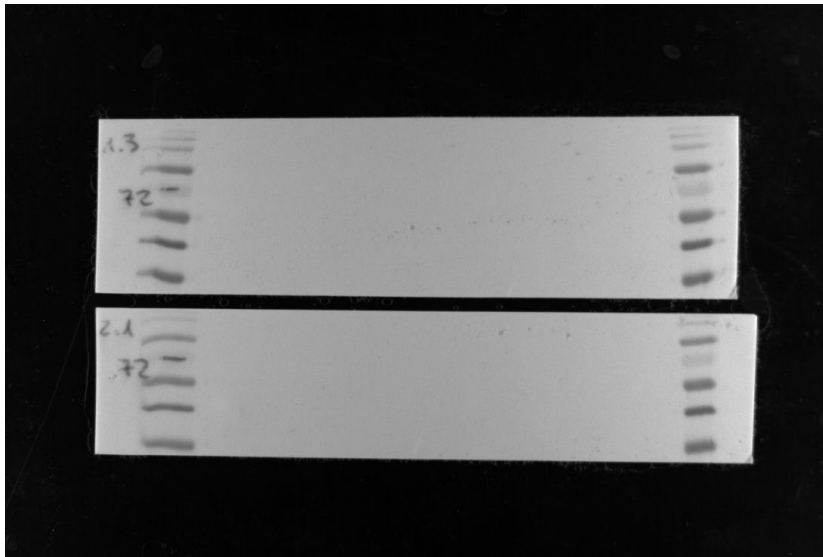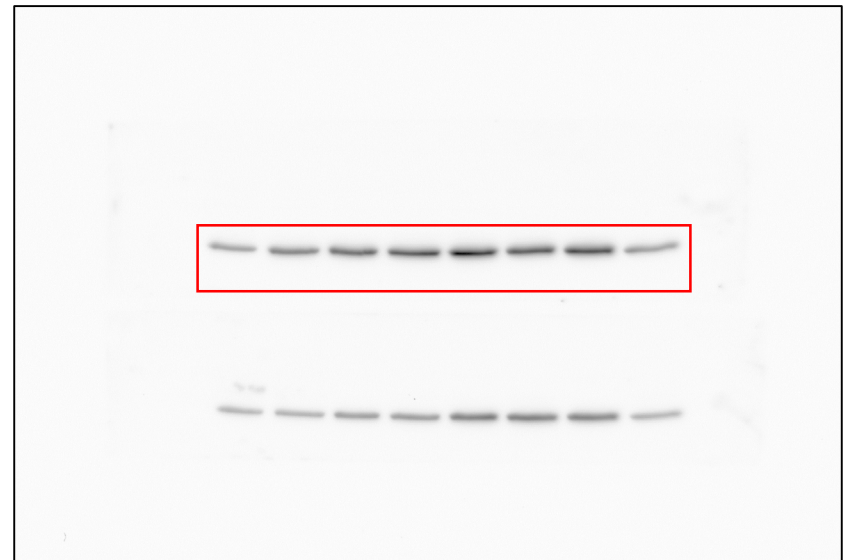

Fig. 3 F  
SW982/WT

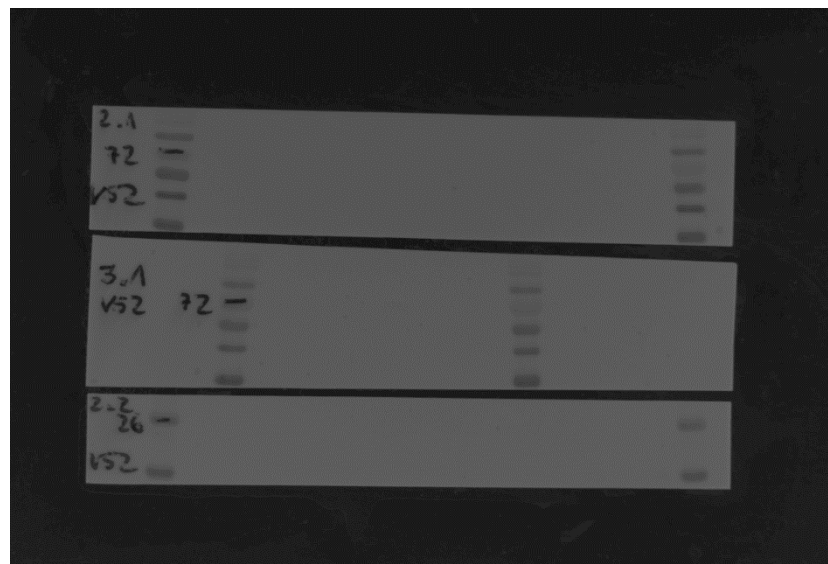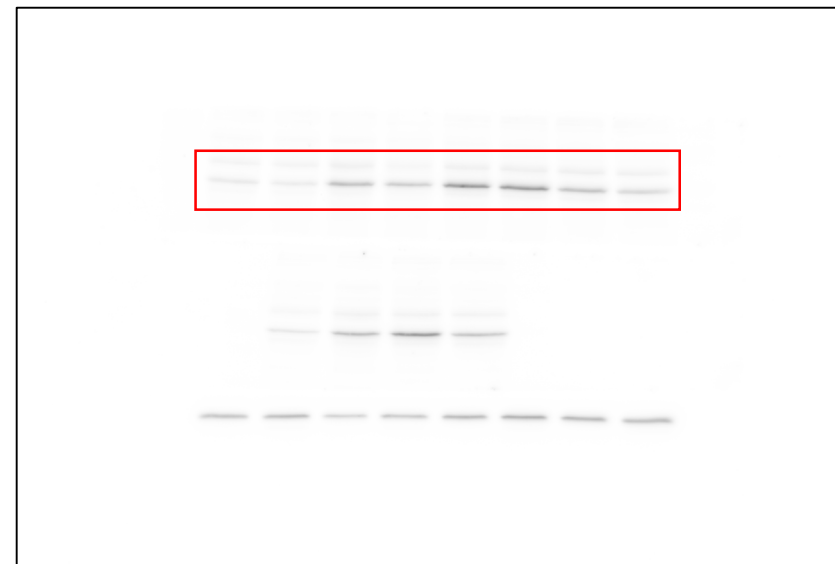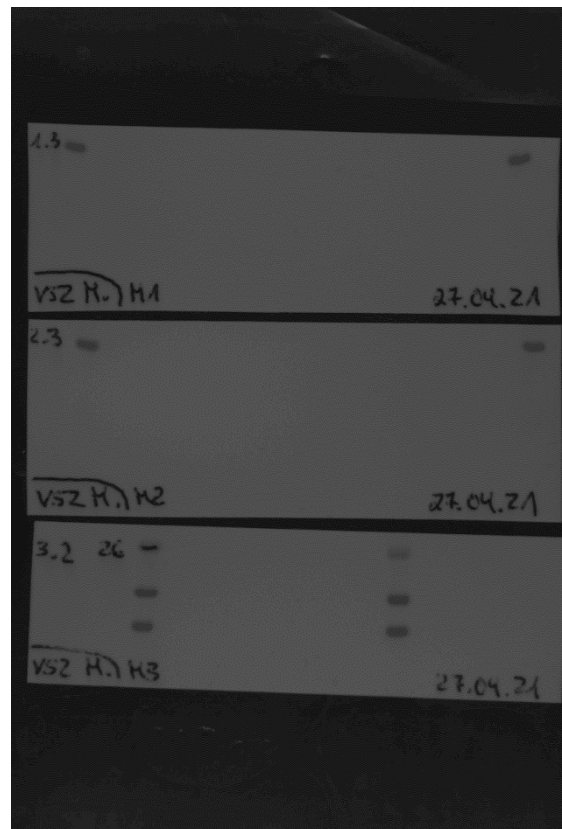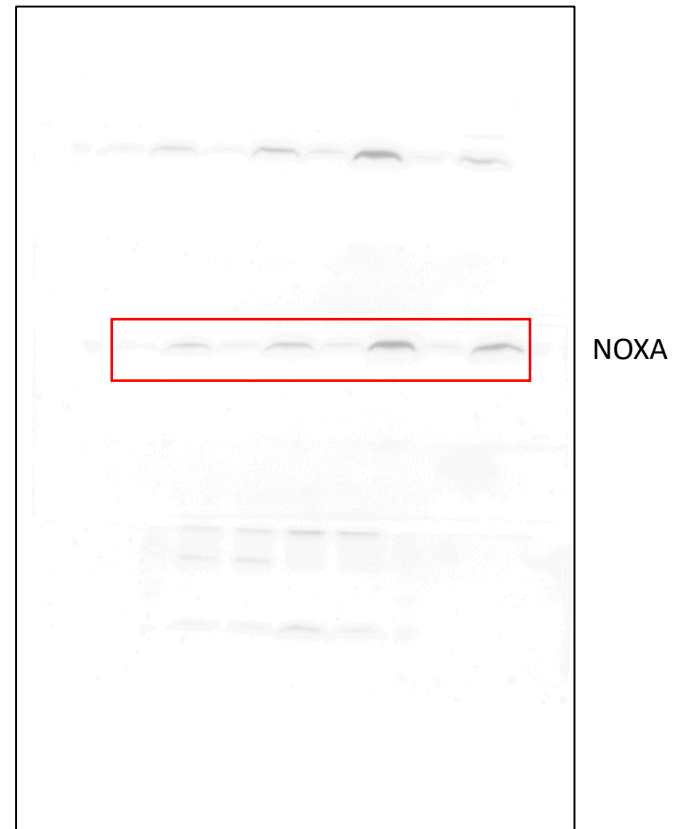

Fig. 3 F  
SW982/WT

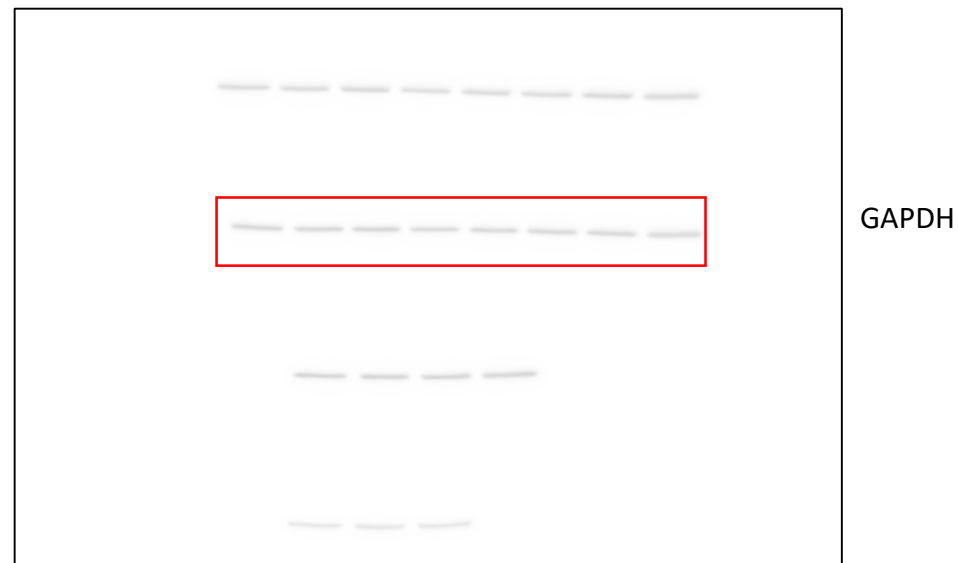

Fig. 3 H  
SW982/WT

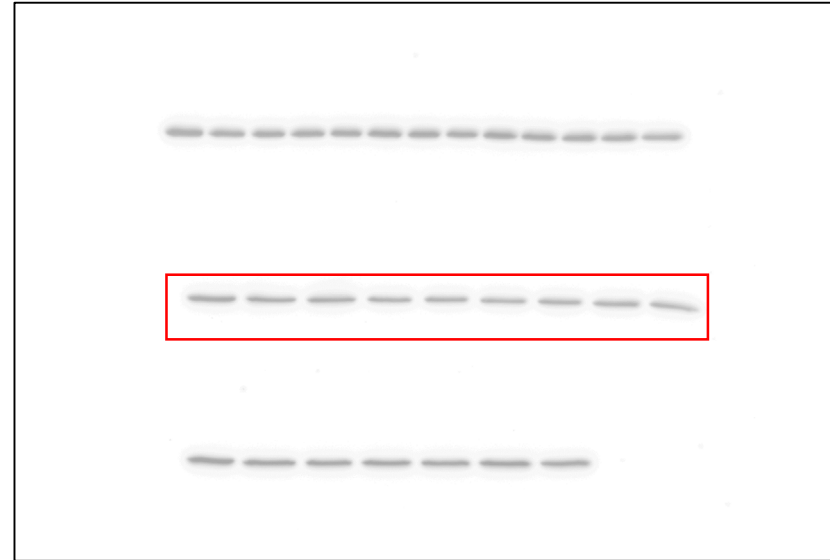

$\beta$ -ACTIN

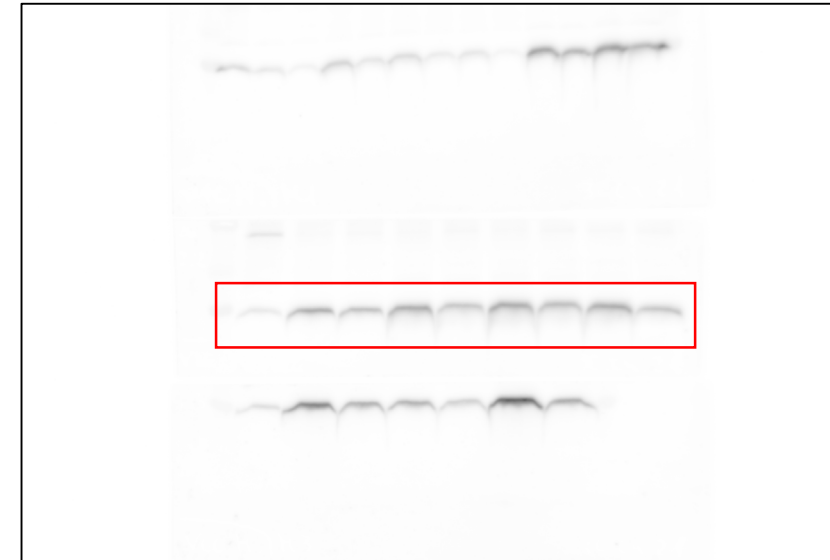

NOXA

Fig. 3 H  
SW982/WT

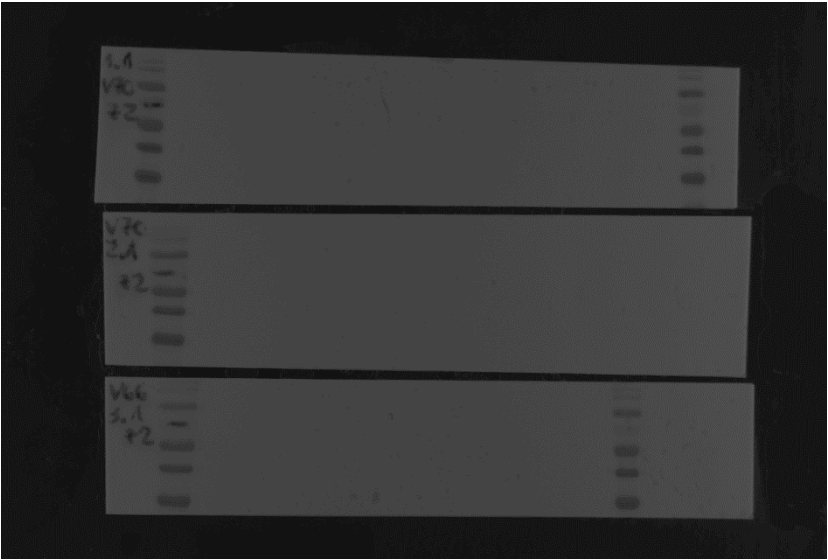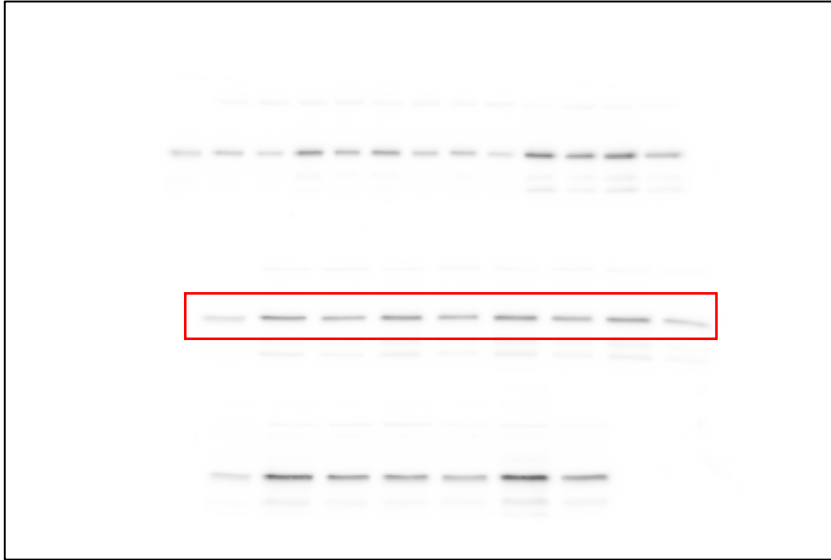

MCL-1

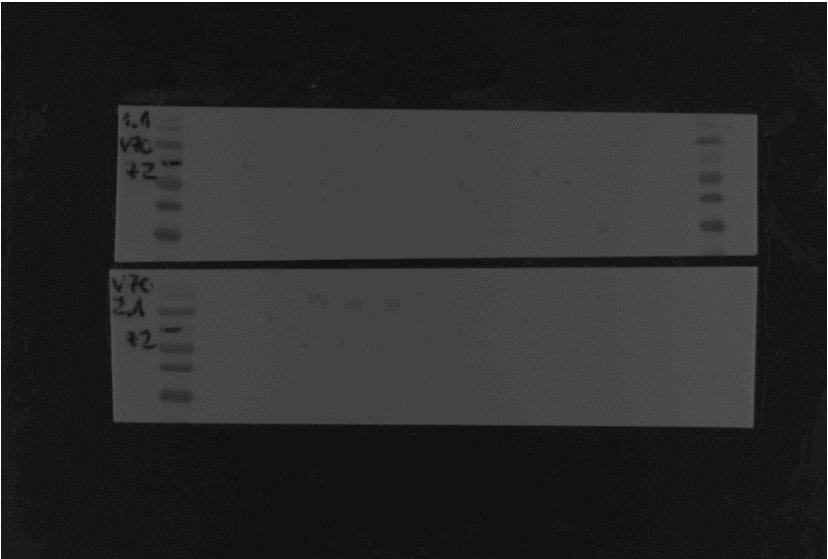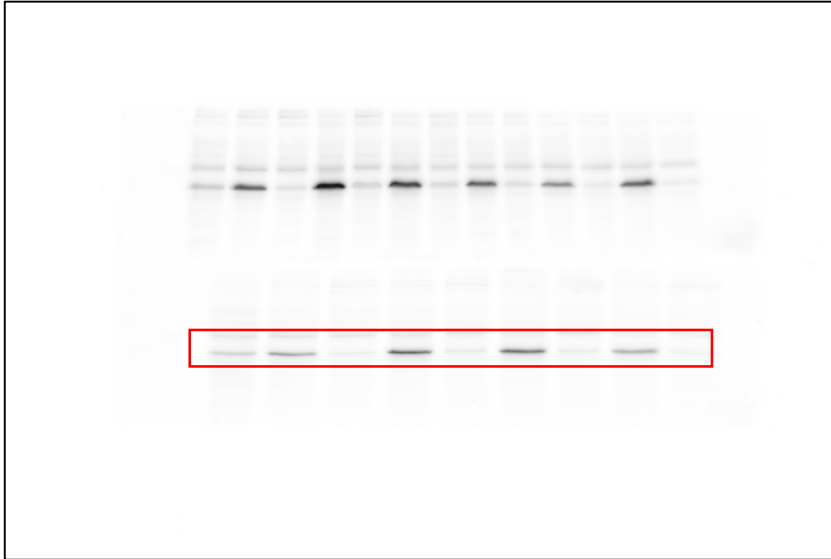

TP53

Fig. 4 A  
SW982/WT

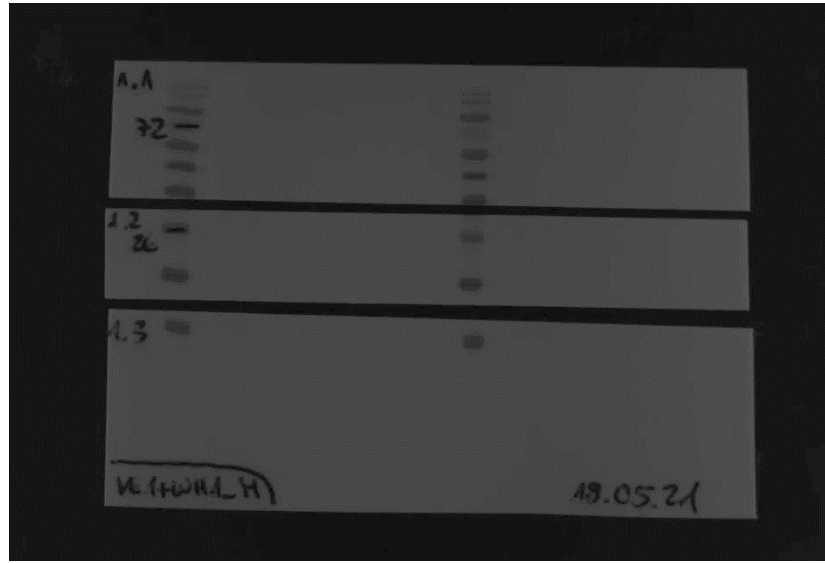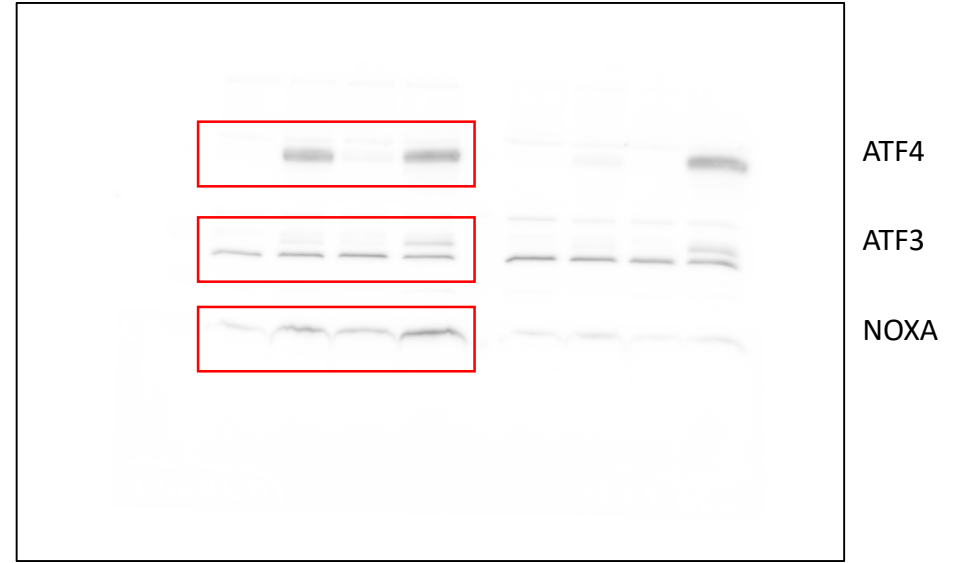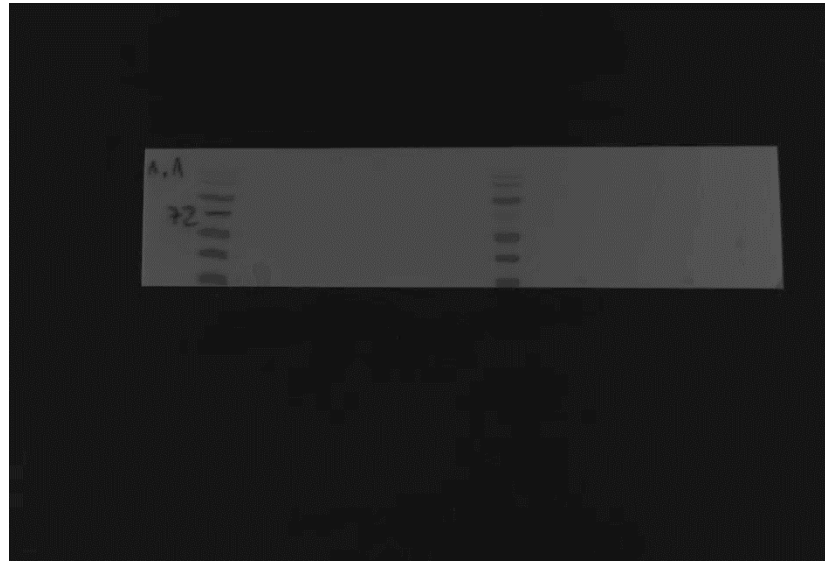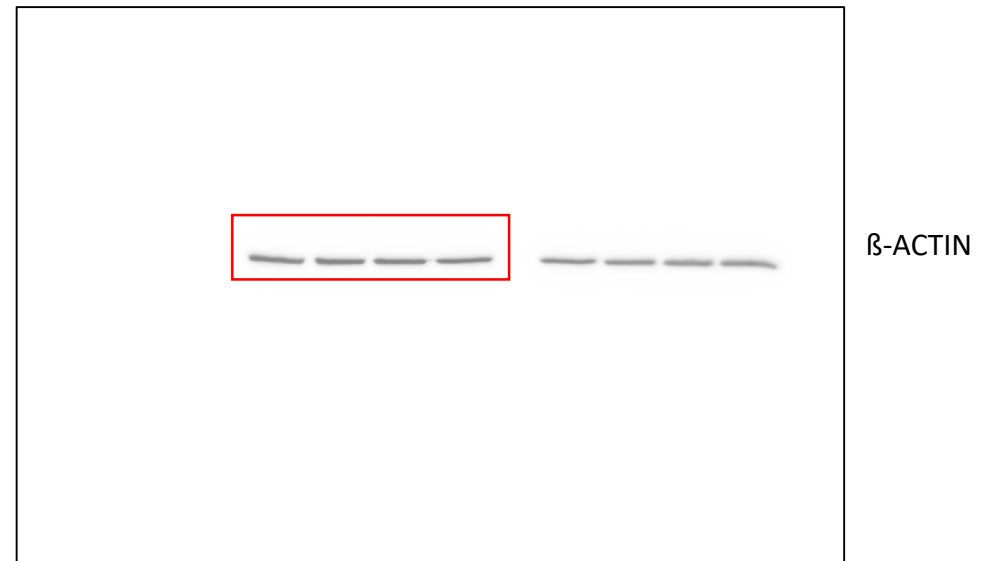

Fig. 4 E  
SW982/WT

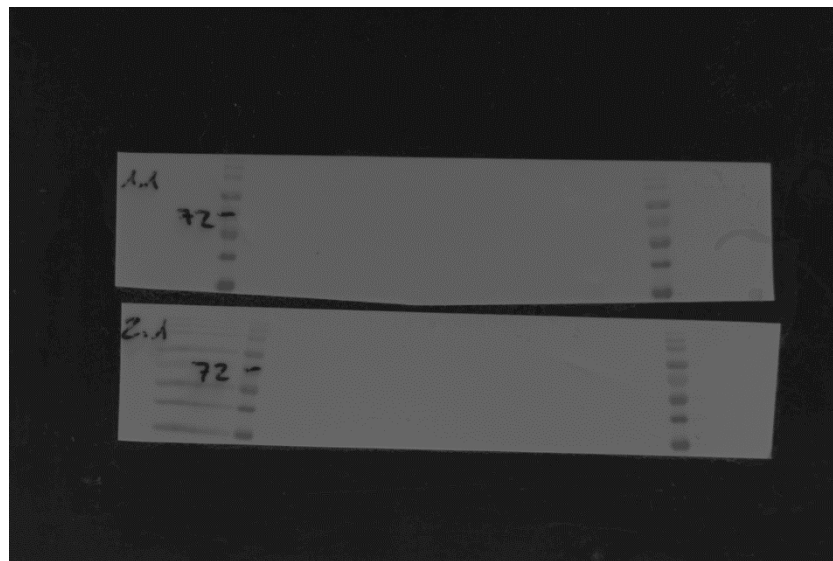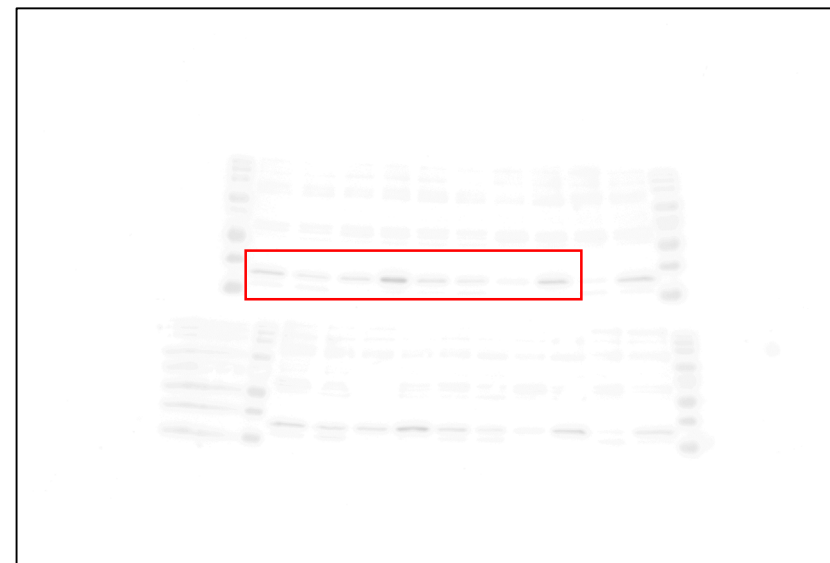

(P)-eIF2a

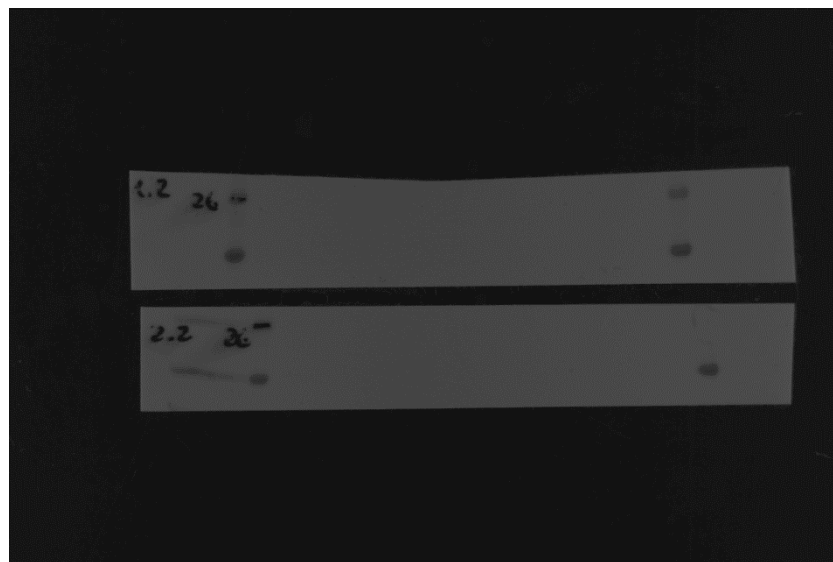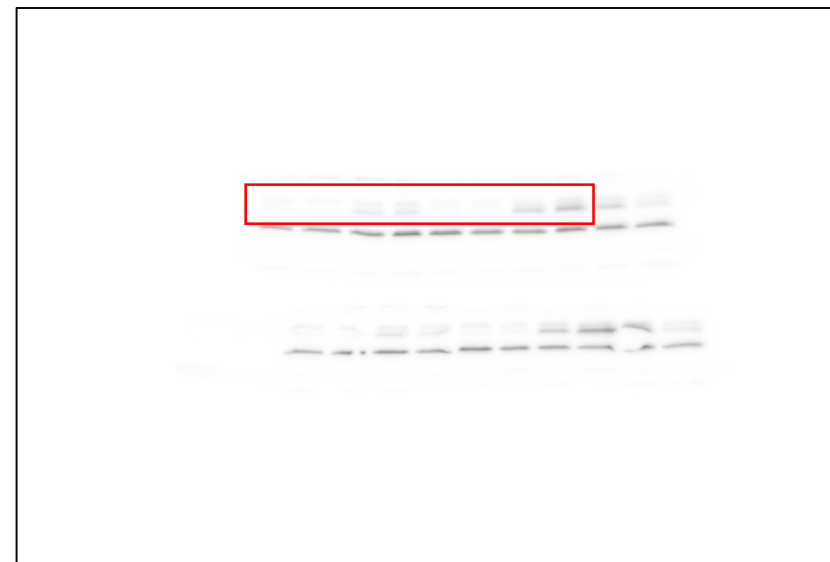

ATF3

Fig. 4 E  
SW982/WT

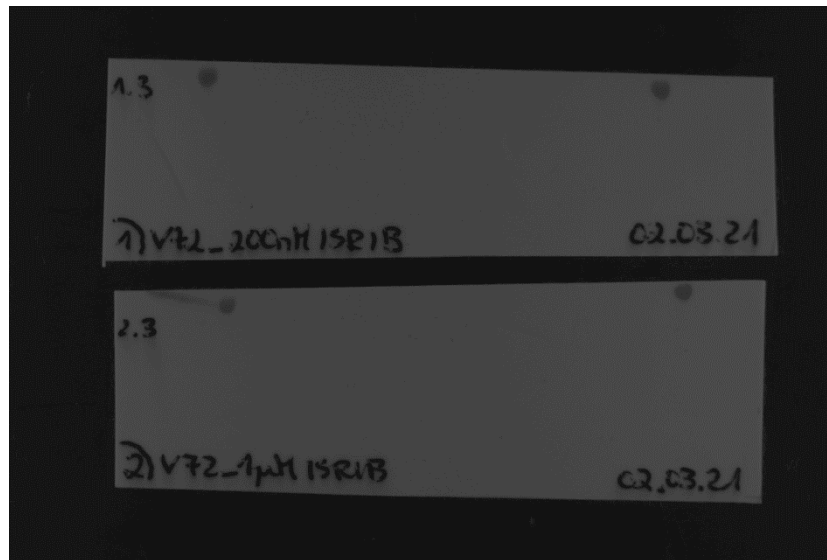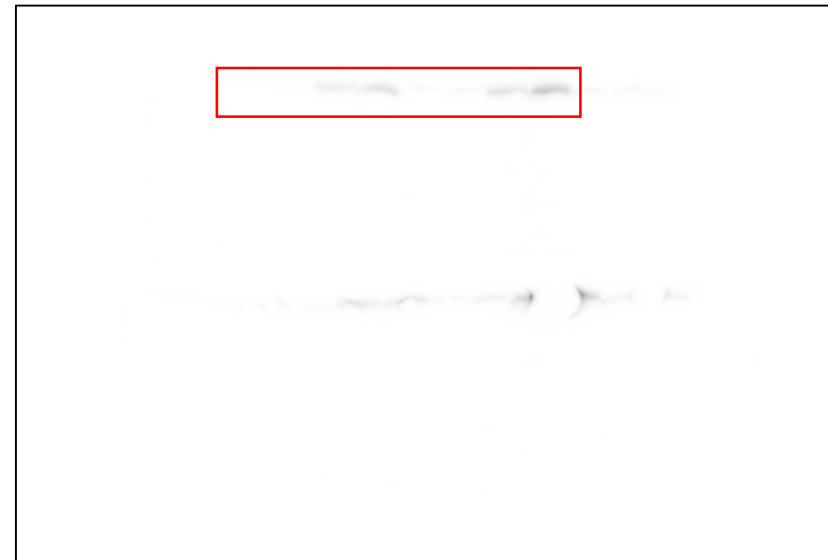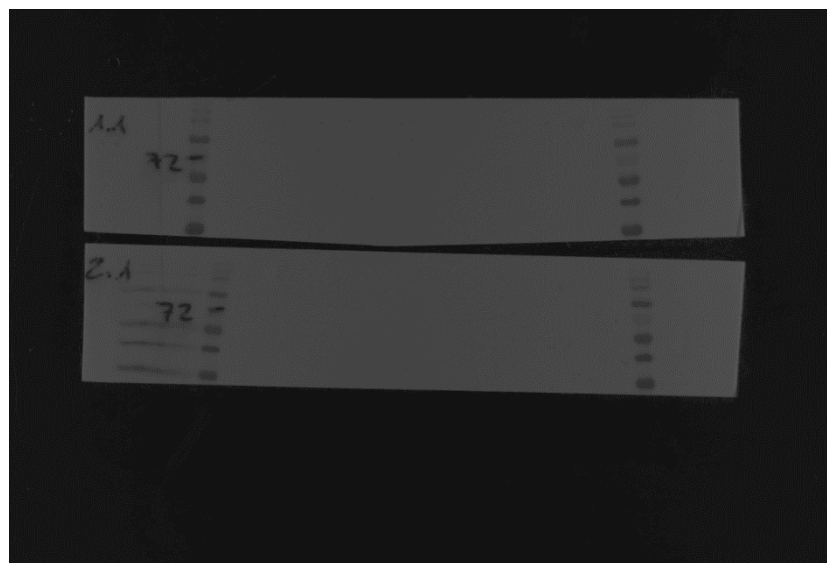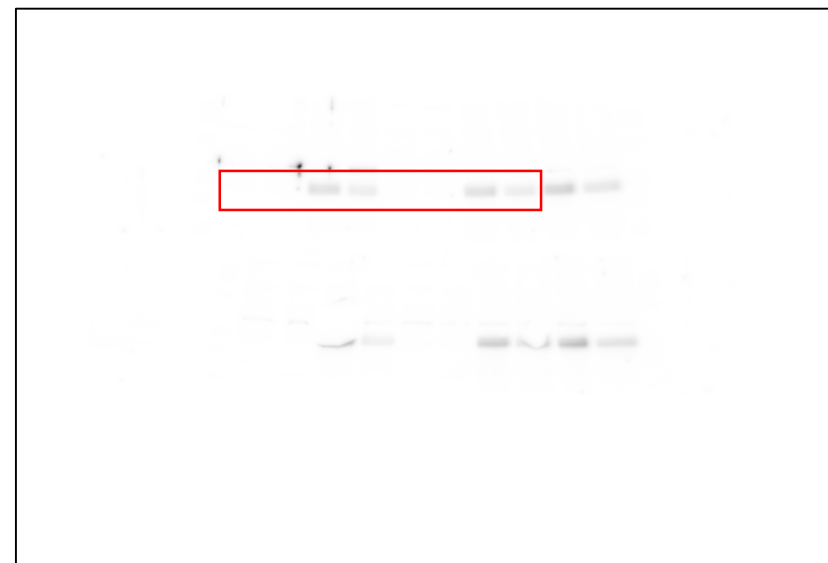



Fig. 4 E  
SW982/WT

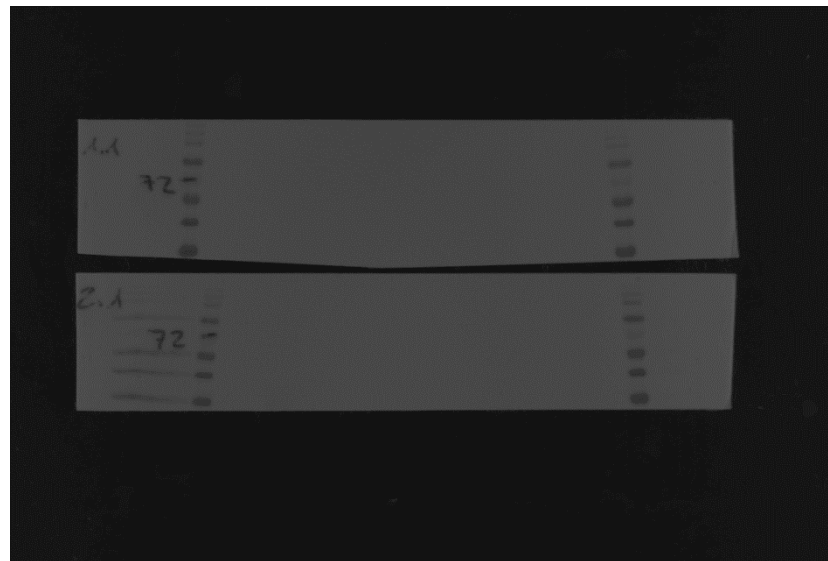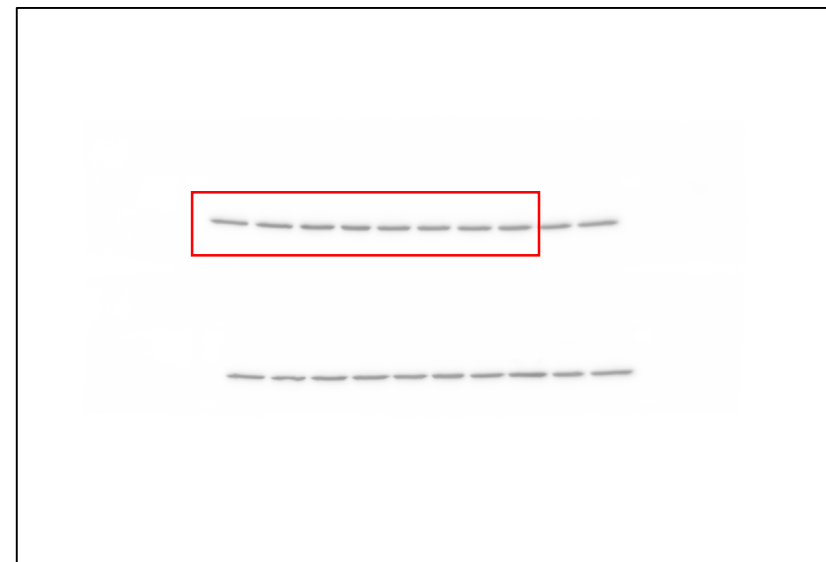

$\beta$ -ACTIN

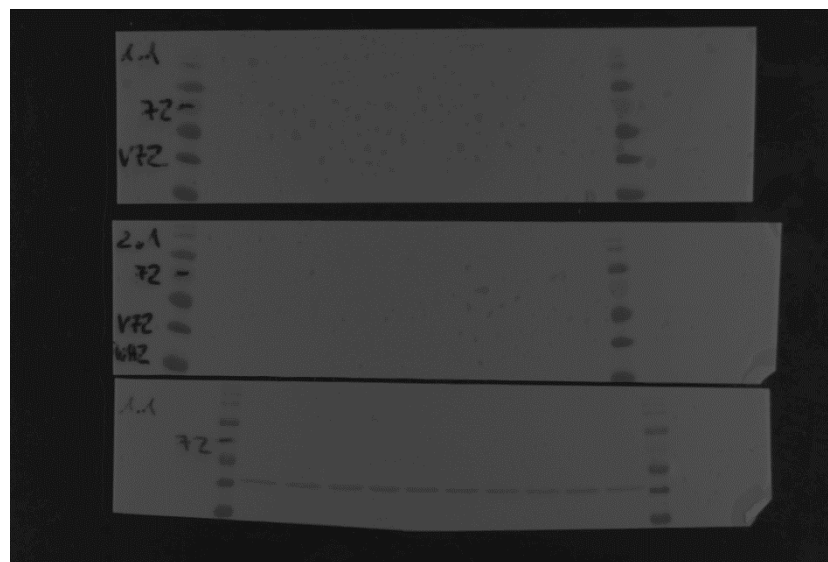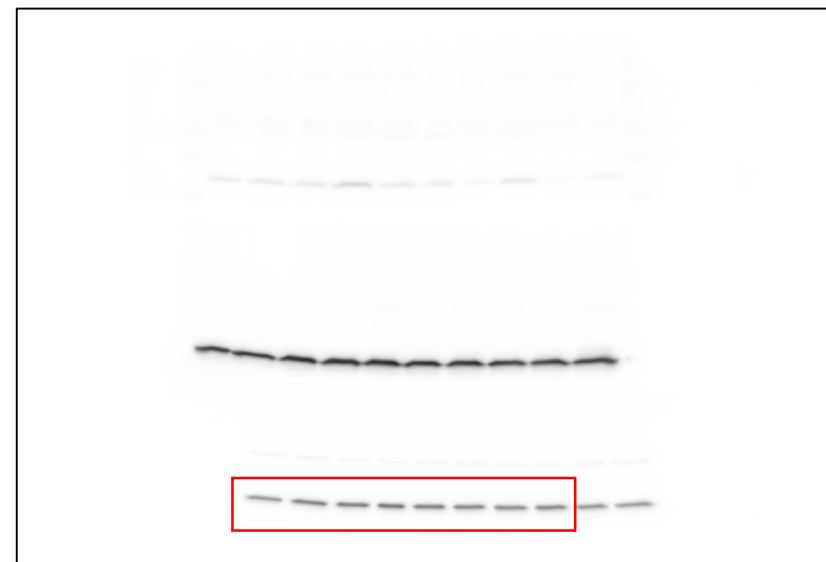

eIF2a

Fig. 5 A  
SW982/WT

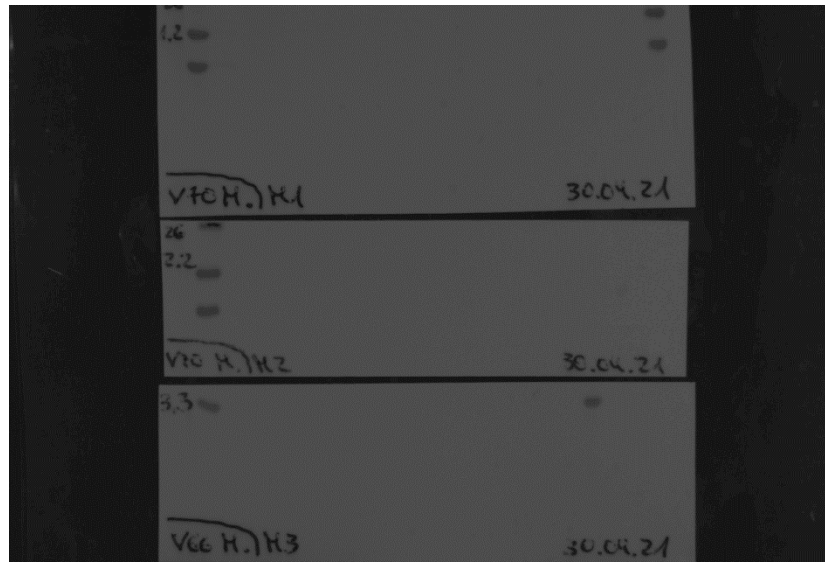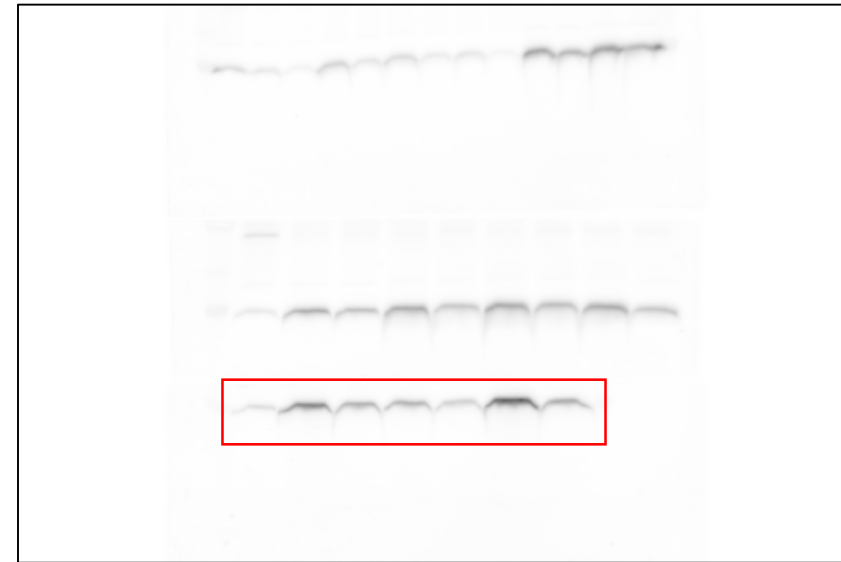

NOXA

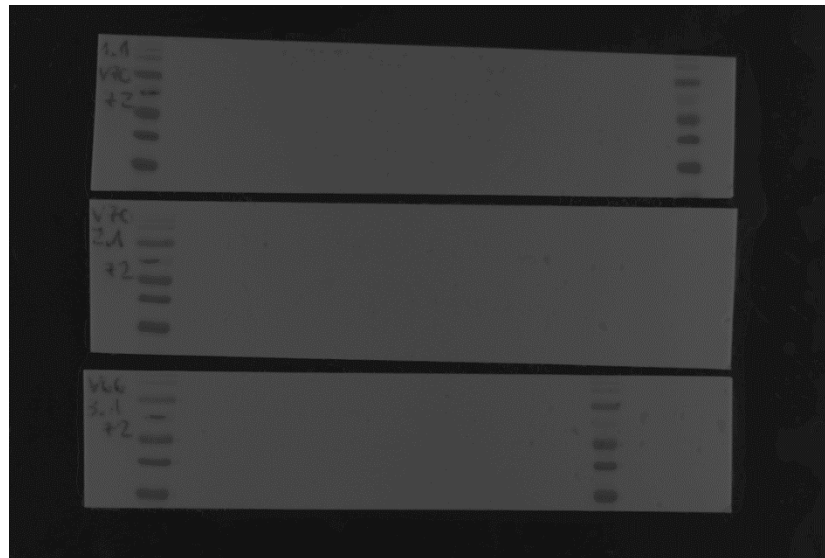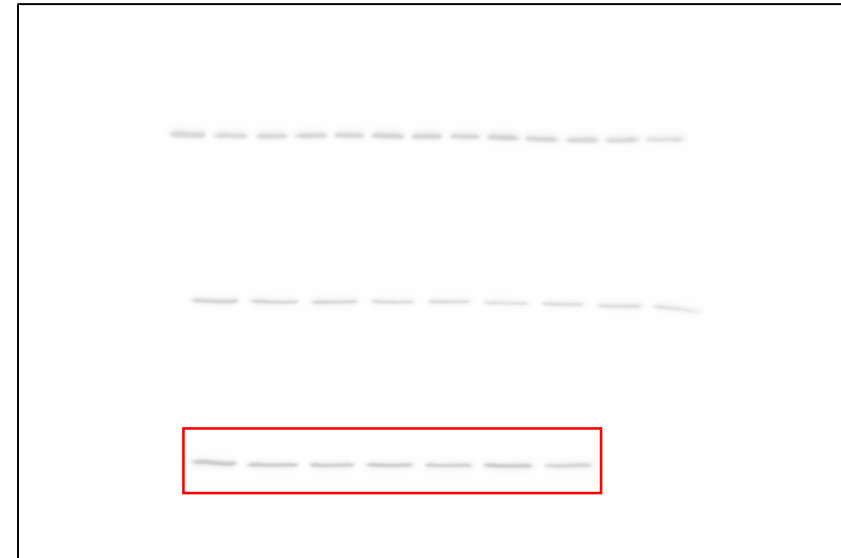

$\beta$ -ACTIN

Suppl. Fig. 1 E

SW982/WT

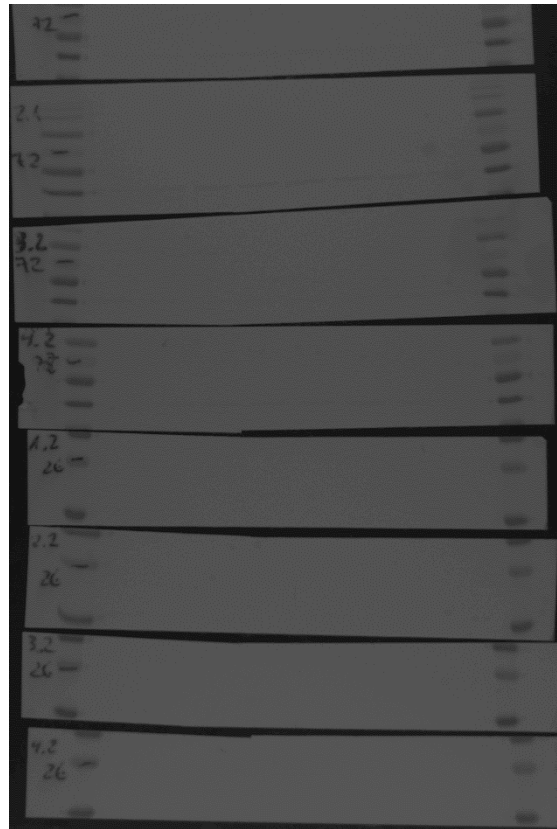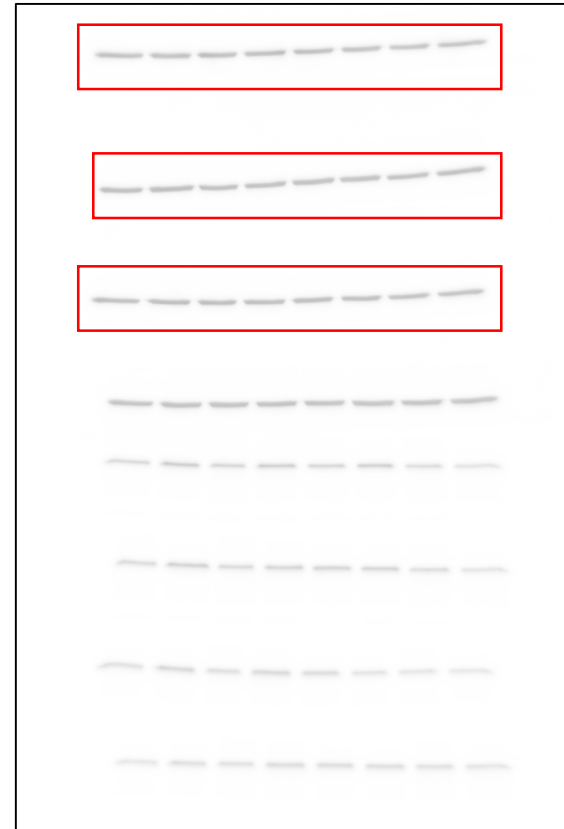

$\beta$ -ACTIN (Suppl.Fig. 1 E)

$\beta$ -ACTIN (Suppl.Fig. 1 F)

$\beta$ -ACTIN (Suppl.Fig. 1 G)

Suppl. Fig. 1 E-G

SW982/WT

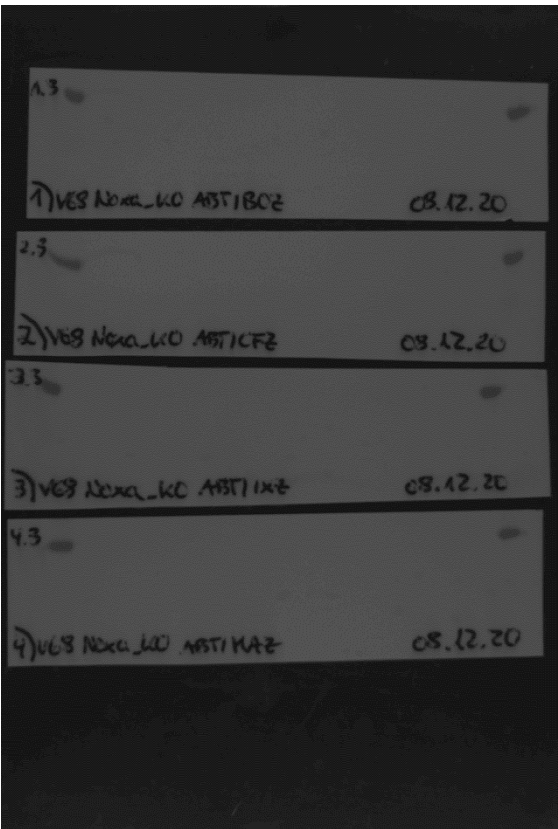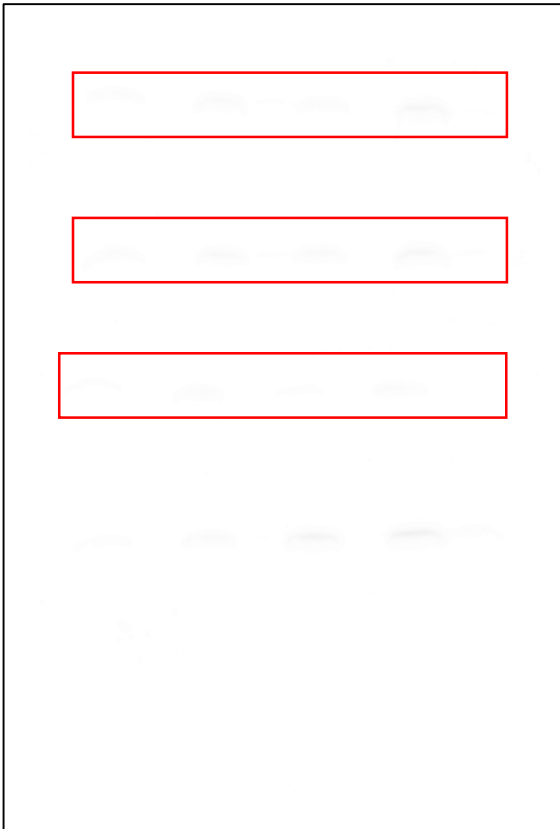

NOXA (Suppl.Fig. 1 E)

NOXA (Suppl.Fig. 1 F)

NOXA (Suppl.Fig. 1 G)

Suppl. Fig. 1 I

HCT116

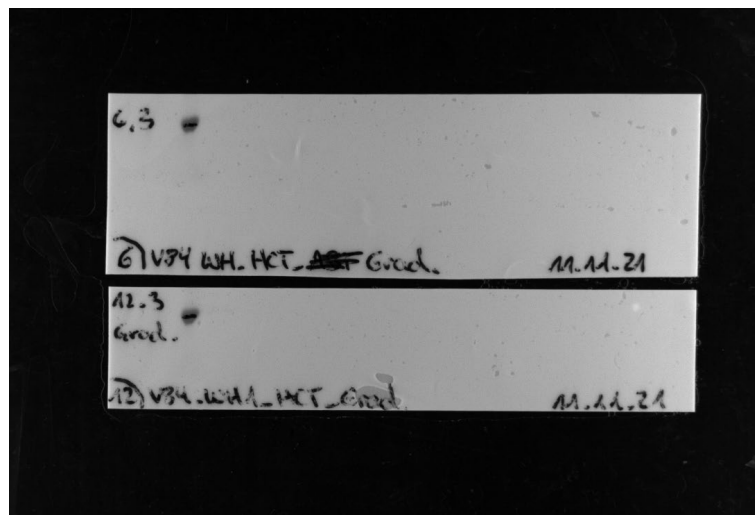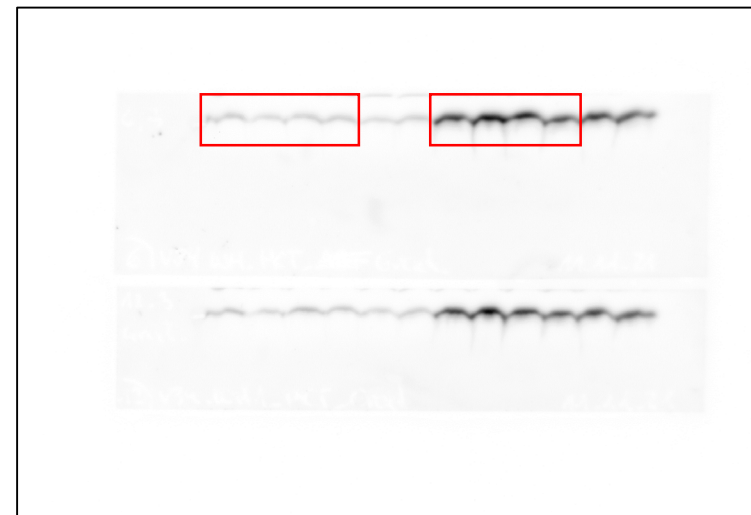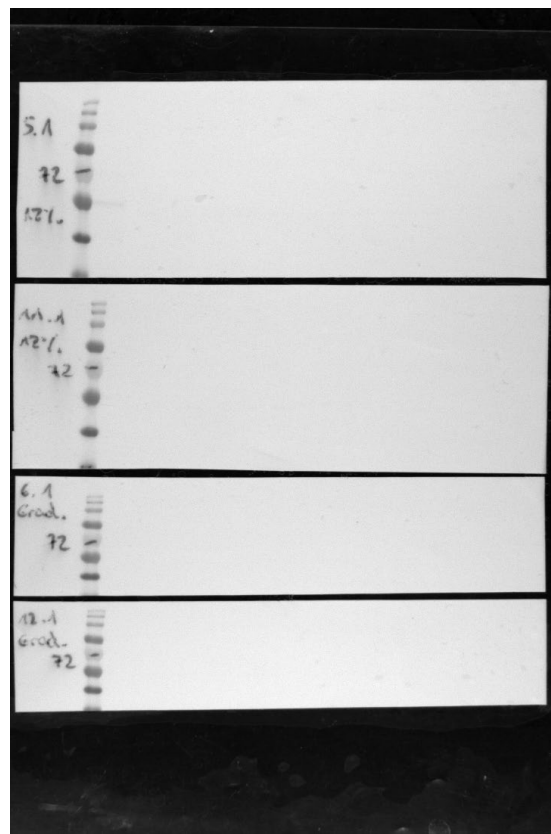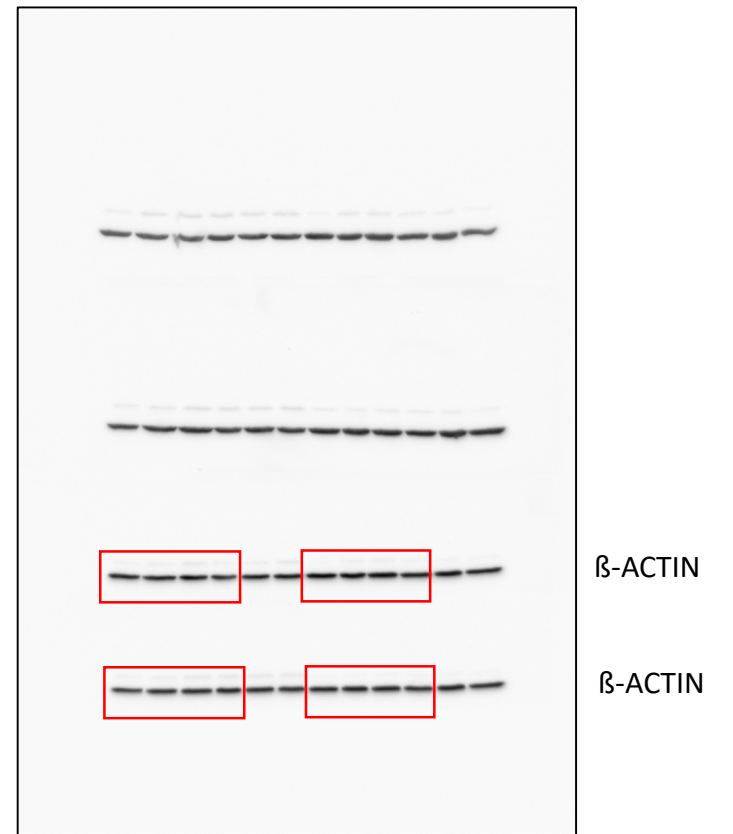

Suppl. Fig. 1 I

HCT116

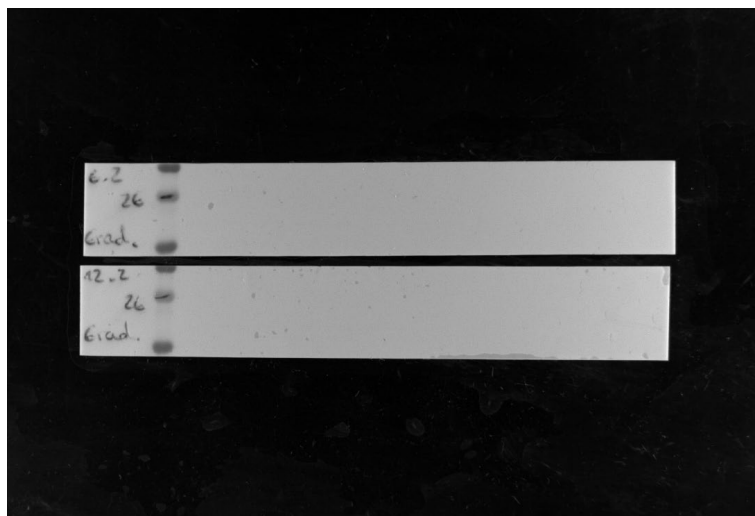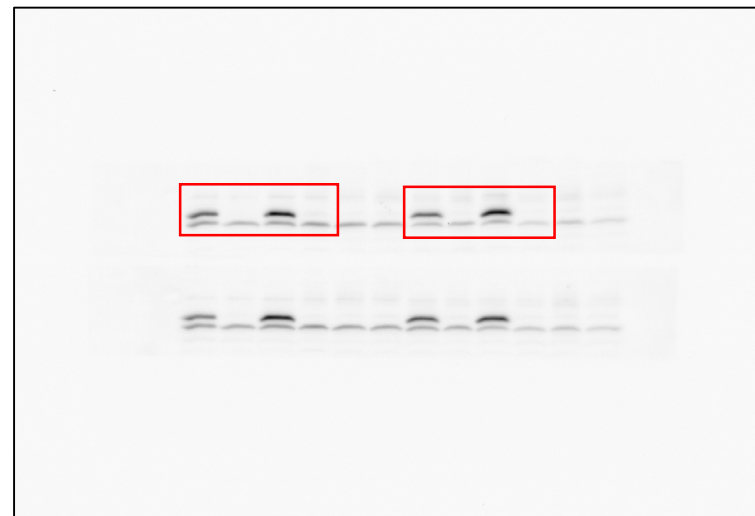

BAX

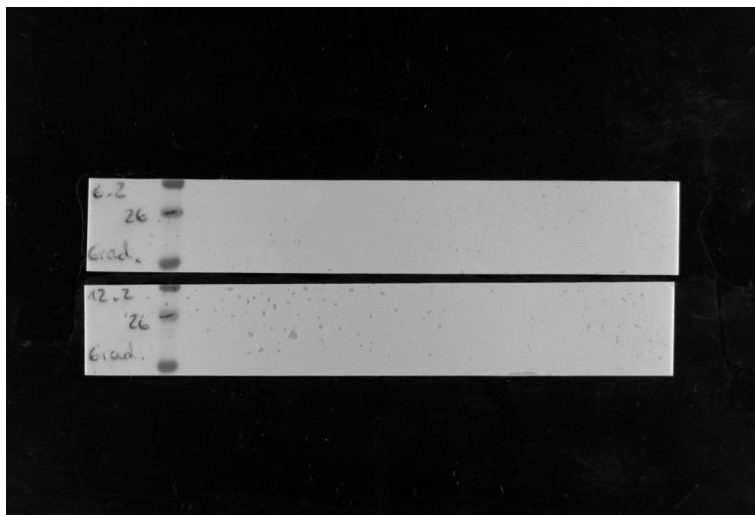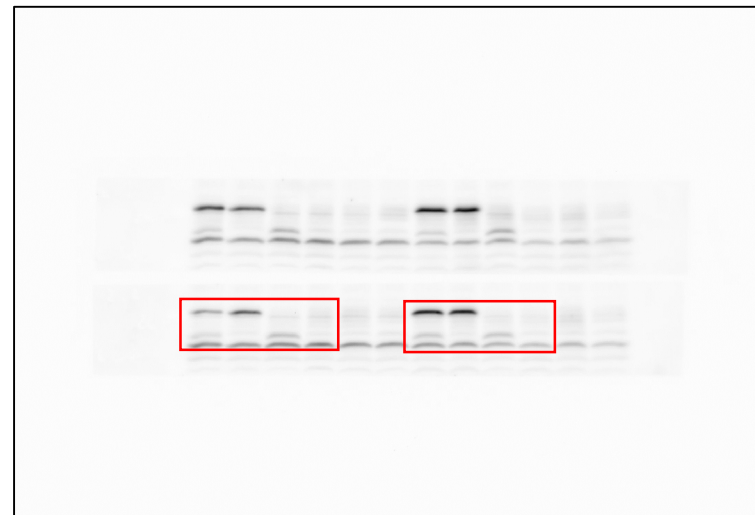

BAK

Suppl. Fig. 2 H

H1299

| H1299+p53 |   |   |   |   |   |   |   |   |                    |
|-----------|---|---|---|---|---|---|---|---|--------------------|
|           | - | + | - | + | - | + | - | + | 15 $\mu$ M ABT-199 |
|           | - | - | + | + | - | - | - | - | 5 nM Bortezomib    |
|           | - | - | - | - | + | + | - | - | 5 nM Carfilzomib   |
|           | - | - | - | - | - | - | + | + | 5 nM Ixazomib      |
| kDa       | + | + | + | + | + | + | + | + | 10 $\mu$ M QVD-OPh |

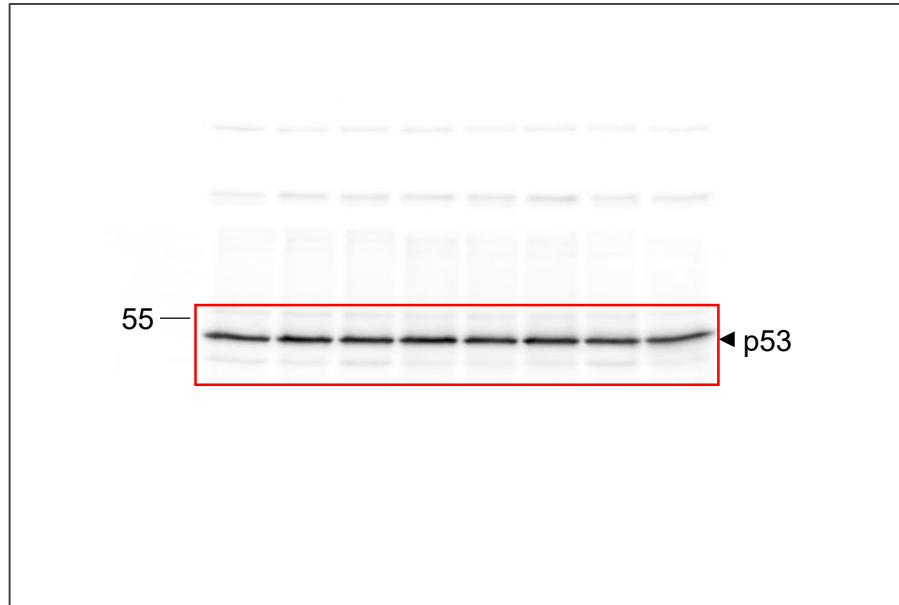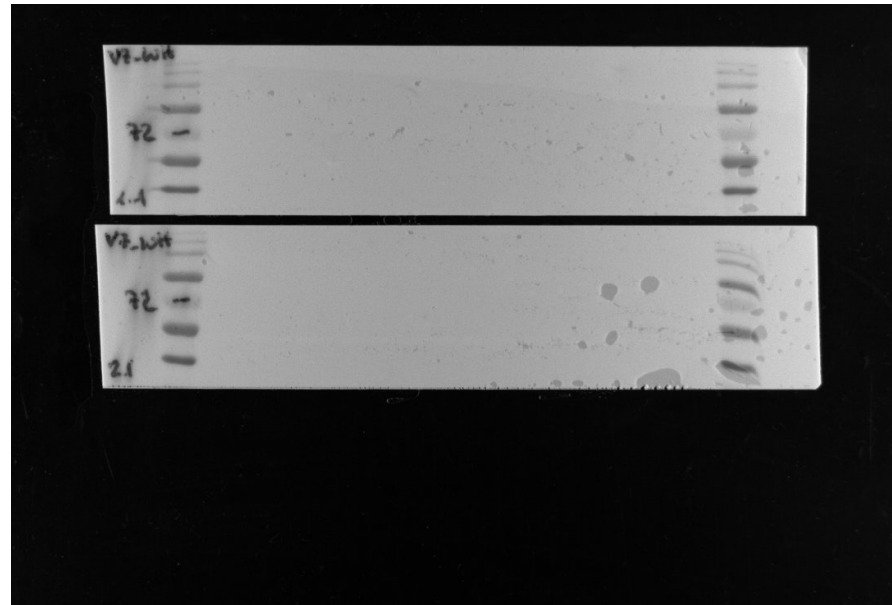

Suppl. Fig. 2 H

H1299

| H1299+p53 |   |   |   |   |   |   |   |   |                    |
|-----------|---|---|---|---|---|---|---|---|--------------------|
|           | - | + | - | + | - | + | - | + | 15 $\mu$ M ABT-199 |
|           | - | - | + | + | - | - | - | - | 5 nM Bortezomib    |
|           | - | - | - | - | + | + | - | - | 5 nM Carfilzomib   |
|           | - | - | - | - | - | - | + | + | 5 nM Ixazomib      |
| kDa       | + | + | + | + | + | + | + | + | 10 $\mu$ M QVD-OPh |

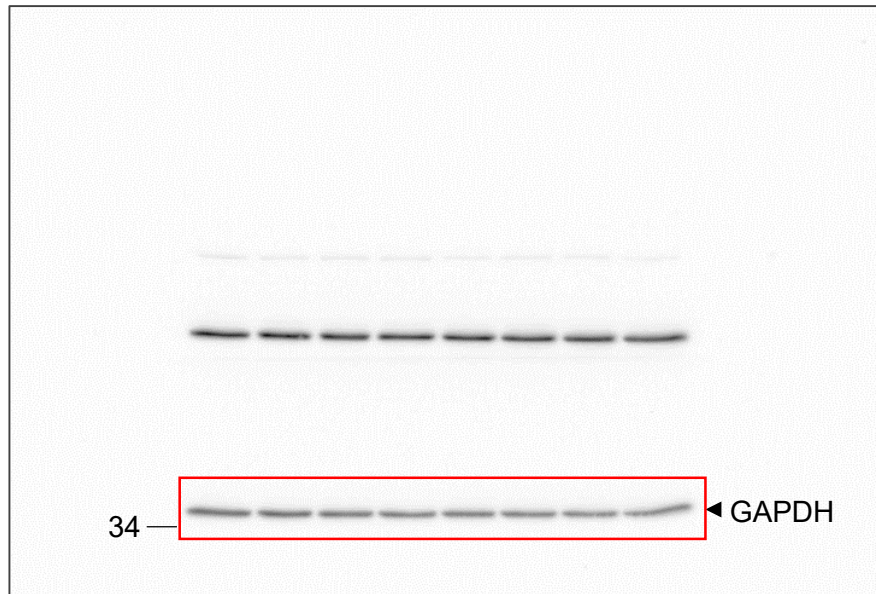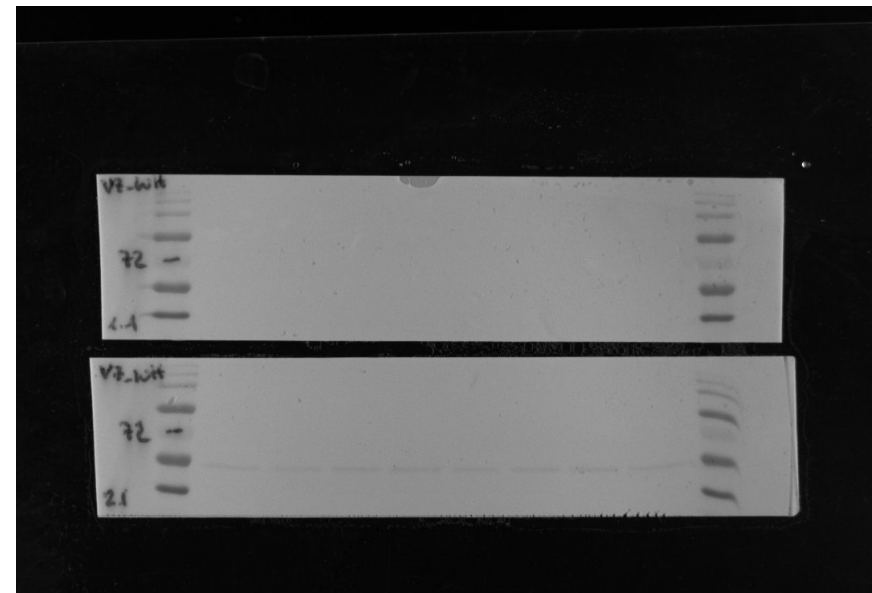



Suppl. Fig. 2 H

H1299

|     |   | H1299+p53 |   |   |   |   |   |   |                    |
|-----|---|-----------|---|---|---|---|---|---|--------------------|
|     | - | +         | - | + | - | + | - | + | 15 $\mu$ M ABT-199 |
|     | - | -         | + | + | - | - | - | - | 5 nM Bortezomib    |
|     | - | -         | - | - | + | + | - | - | 5 nM Carfilzomib   |
|     | - | -         | - | - | - | - | + | + | 5 nM Ixazomib      |
| kDa | + | +         | + | + | + | + | + | + | 10 $\mu$ M QVD-OPh |

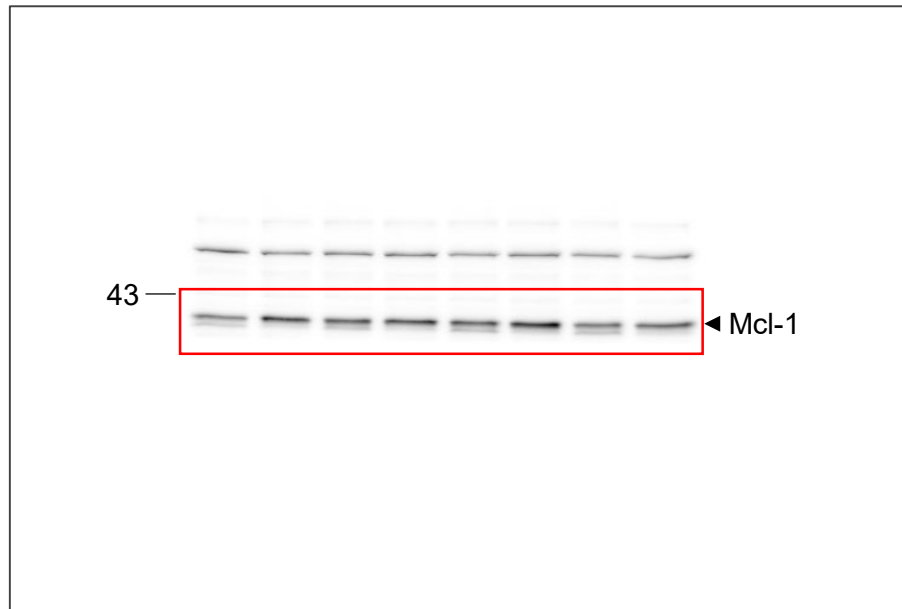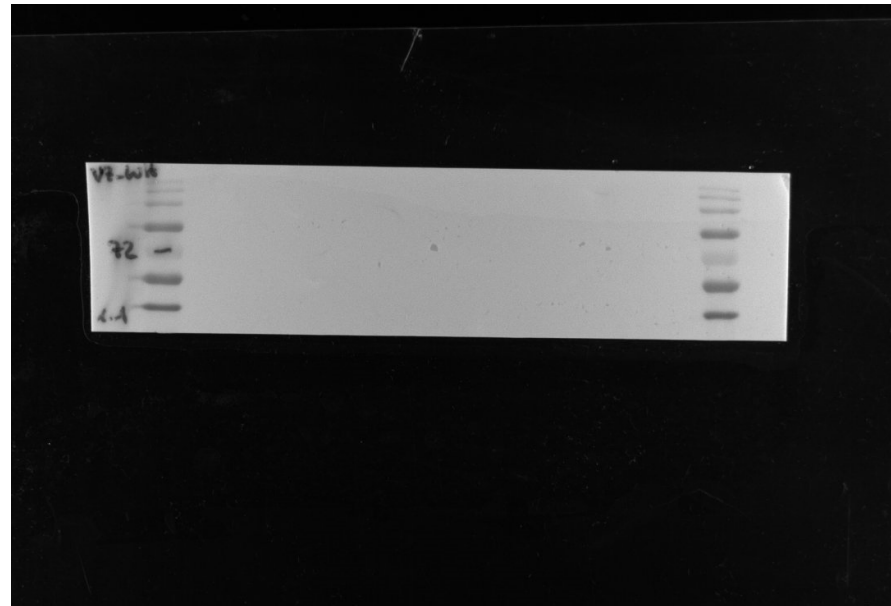

# Suppl. Fig. 2 H

## H1299

| H1299+p53 |   |   |   |   |   |   |   |   |                    |
|-----------|---|---|---|---|---|---|---|---|--------------------|
|           | - | + | - | + | - | + | - | + | 15 $\mu$ M ABT-199 |
|           | - | - | + | + | - | - | - | - | 5 nM Bortezomib    |
|           | - | - | - | - | + | + | - | - | 5 nM Carfilzomib   |
|           | - | - | - | - | - | - | + | + | 5 nM Ixazomib      |
| kDa       | + | + | + | + | + | + | + | + | 10 $\mu$ M QVD-OPh |

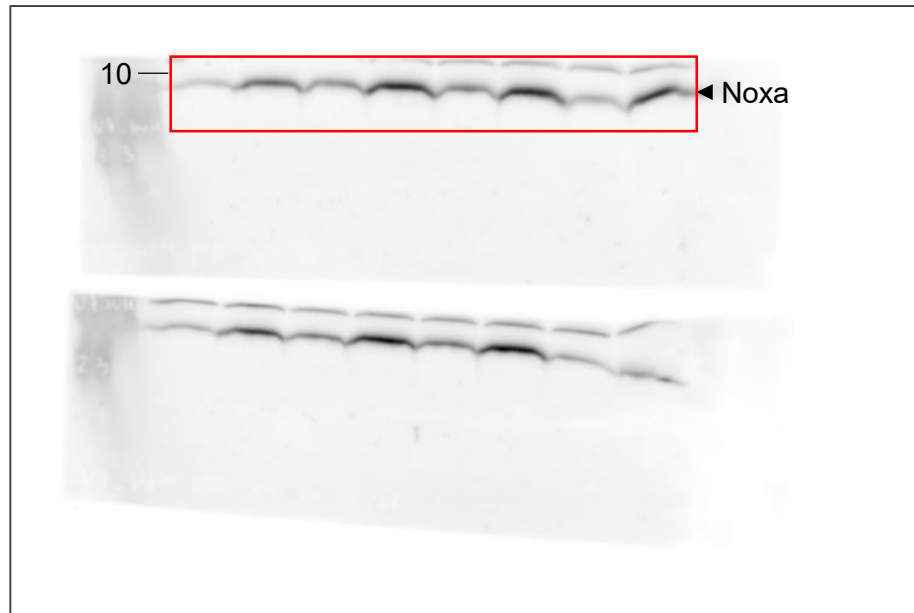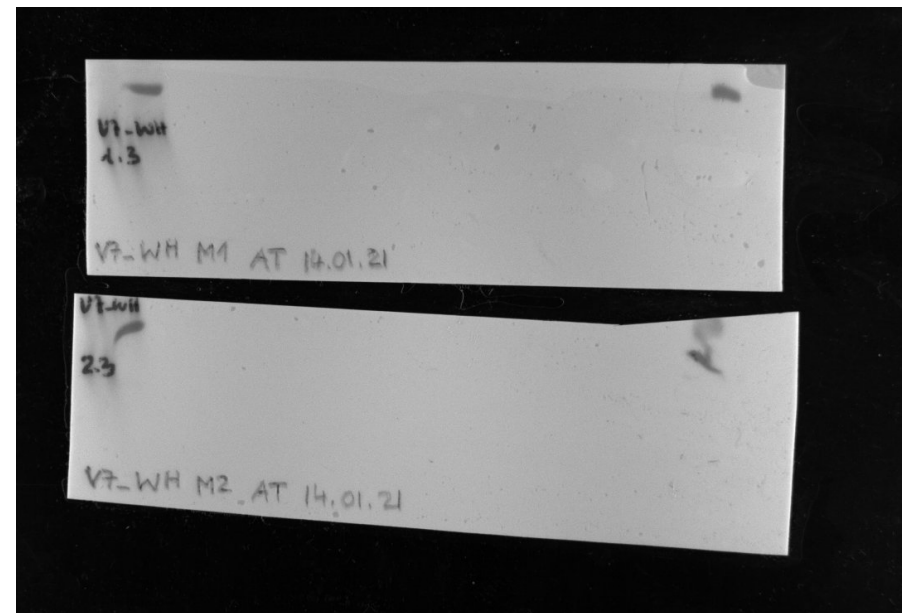

Suppl. Fig. 2 H

H1299

| H1299+p53 |   |   |   |   |   |   |   |   |                    |
|-----------|---|---|---|---|---|---|---|---|--------------------|
|           | - | + | - | + | - | + | - | + | 15 $\mu$ M ABT-199 |
|           | - | - | + | + | - | - | - | - | 5 nM Bortezomib    |
|           | - | - | - | - | + | + | - | - | 5 nM Carfilzomib   |
|           | - | - | - | - | - | - | + | + | 5 nM Ixazomib      |
| kDa       | + | + | + | + | + | + | + | + | 10 $\mu$ M QVD-OPh |

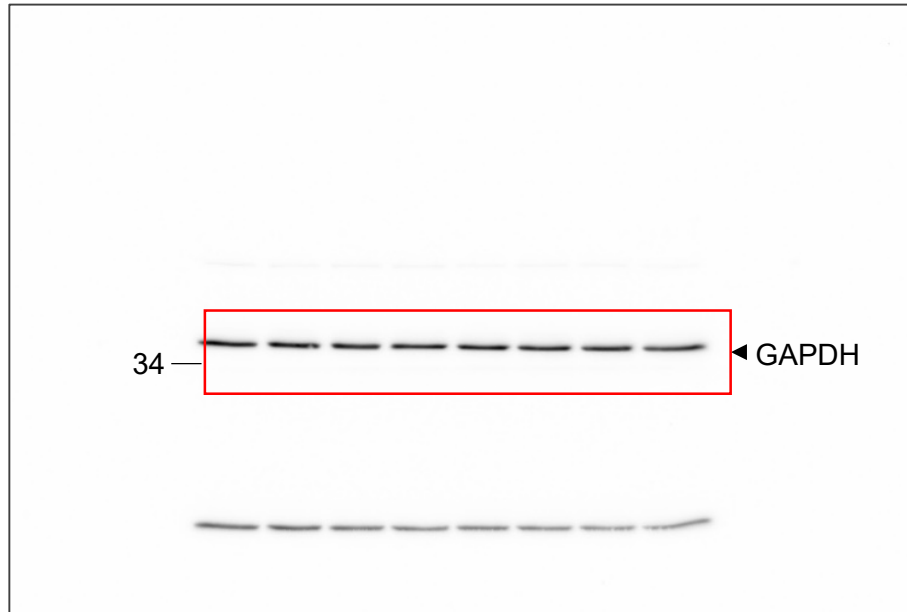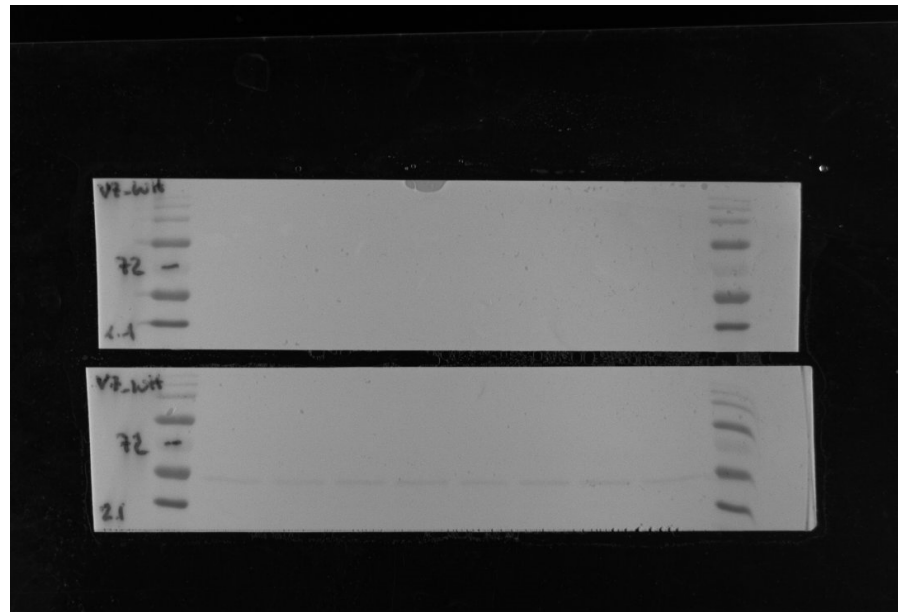

Suppl. Fig. 2 H

H1299

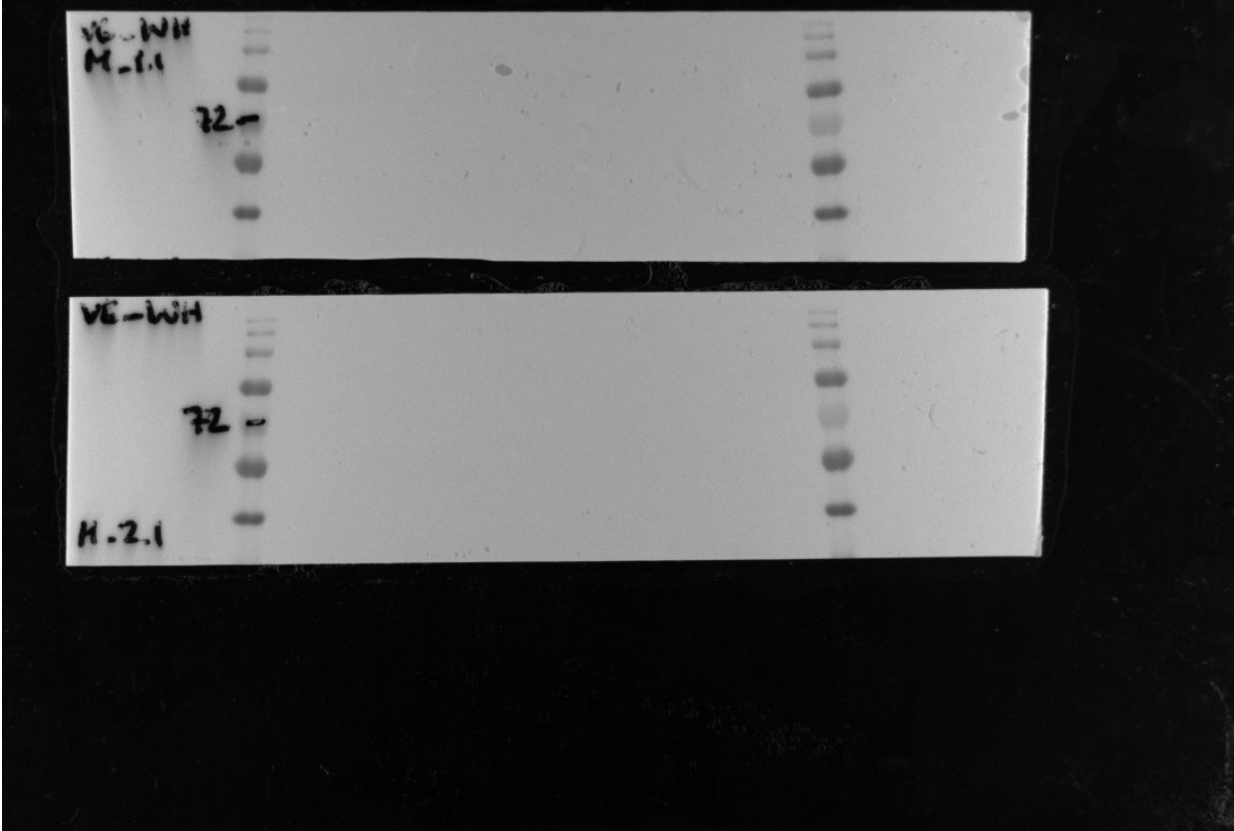

|     |           | H1299 |   |   |   |   |   |   |   |                    |
|-----|-----------|-------|---|---|---|---|---|---|---|--------------------|
| kDa | H1299+p53 | -     | + | - | + | - | + | - | + | 15 $\mu$ M ABT-199 |
|     |           | -     | - | + | + | - | - | - | - | 5 nM Bortezomib    |
|     |           | -     | - | - | - | + | + | - | - | 5 nM Carfilzomib   |
|     |           | -     | - | - | - | - | - | + | + | 5 nM Ixazomib      |
|     |           | +     | + | + | + | + | + | + | + | 10 $\mu$ M QVD-OPh |

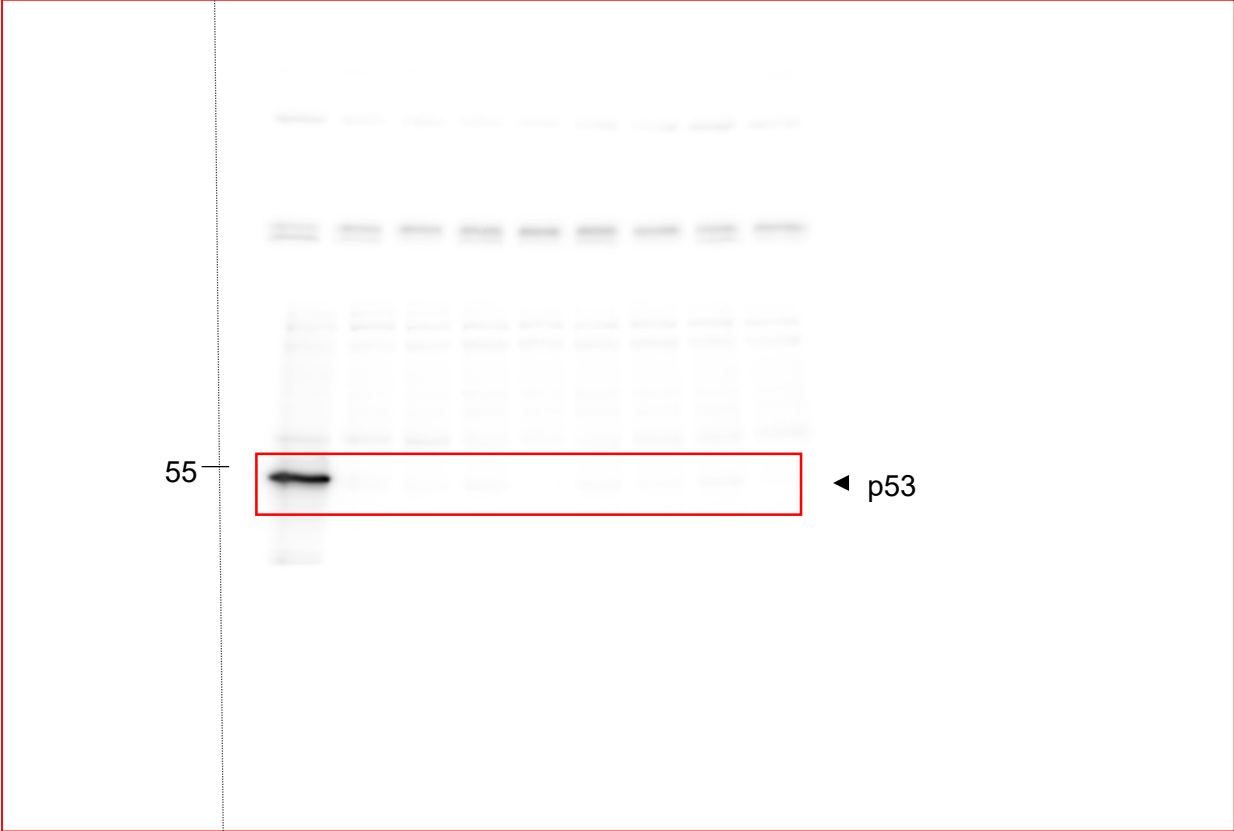

Suppl. Fig. 2 H

H1299

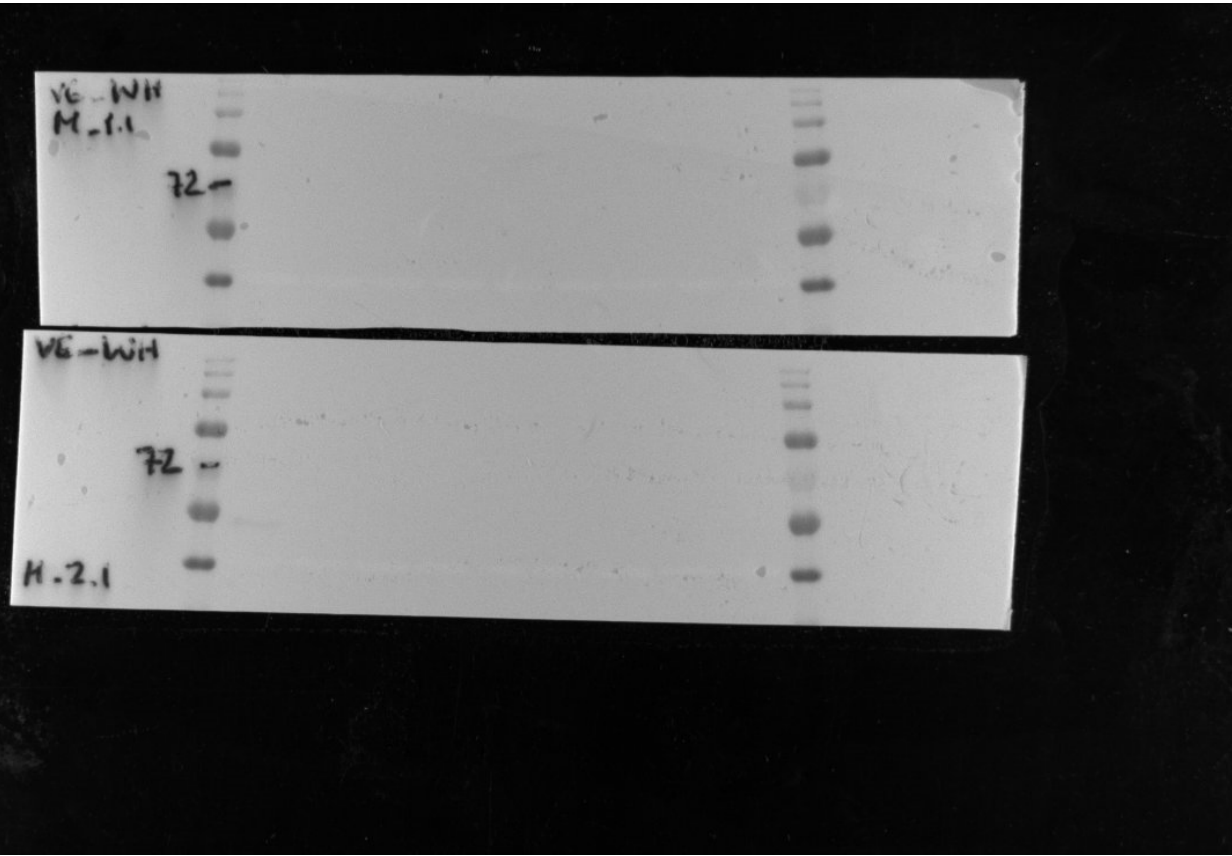

|           |  | H1299 |   |   |   |   |   |   |   |                    |
|-----------|--|-------|---|---|---|---|---|---|---|--------------------|
| H1299+p53 |  | -     | + | - | + | - | + | - | + | 15 $\mu$ M ABT-199 |
|           |  | -     | - | + | + | - | - | - | - | 5 nM Bortezomib    |
|           |  | -     | - | - | - | + | + | - | - | 5 nM Carfilzomib   |
|           |  | -     | - | - | - | - | - | + | + | 5 nM Ixazomib      |
|           |  | +     | + | + | + | + | + | + | + | 10 $\mu$ M QVD-OPh |

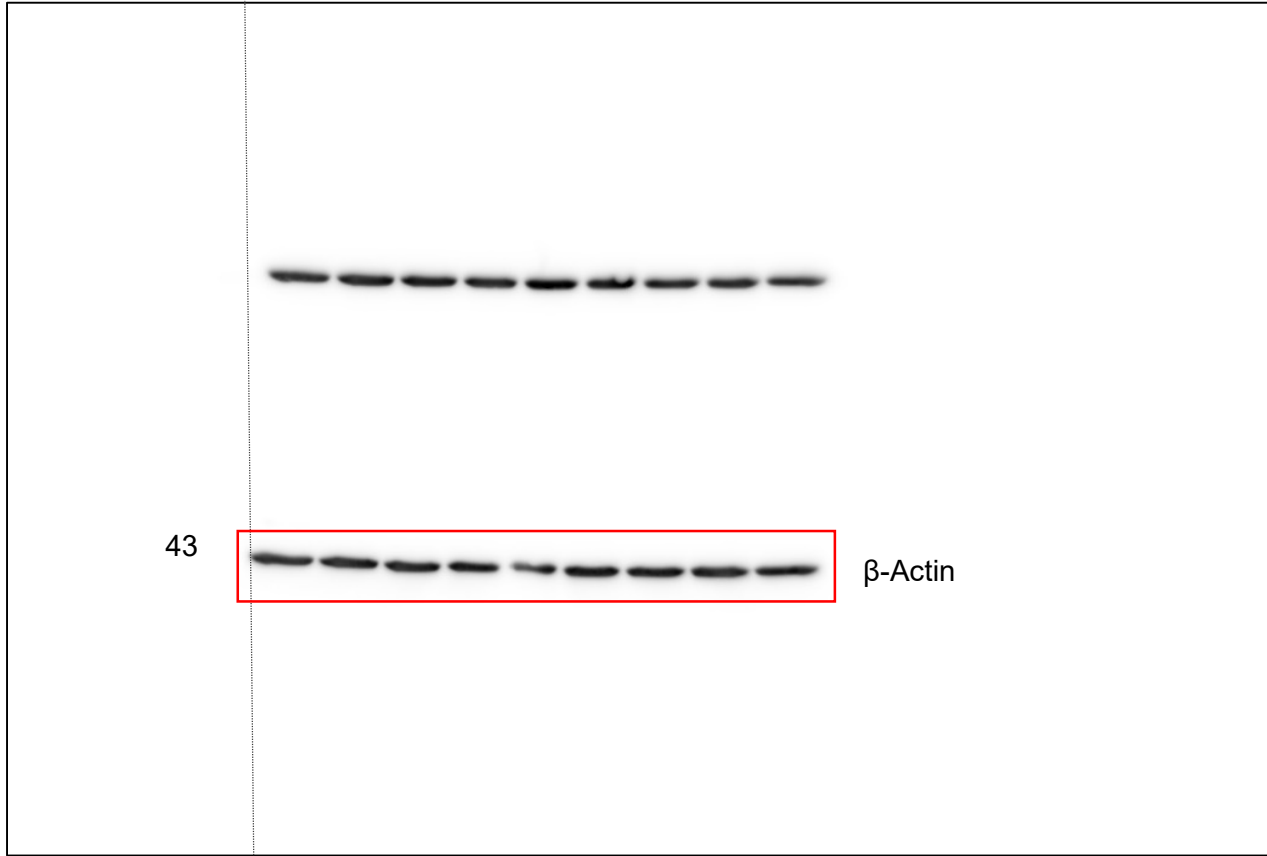

Suppl. Fig. 2 H  
H1299

|     |           | H1299 |   |   |   |   |   |   |   |                    |
|-----|-----------|-------|---|---|---|---|---|---|---|--------------------|
|     |           | -     | + | - | + | - | + | - | + | 15 $\mu$ M ABT-199 |
|     |           | -     | - | + | + | - | - | - | - | 5 nM Bortezomib    |
|     |           | -     | - | - | - | + | + | - | - | 5 nM Carfilzomib   |
|     |           | -     | - | - | - | - | - | + | + | 5 nM Ixazomib      |
| kDa | H1299+p53 | +     | + | + | + | + | + | + | + | 10 $\mu$ M QVD-OPh |

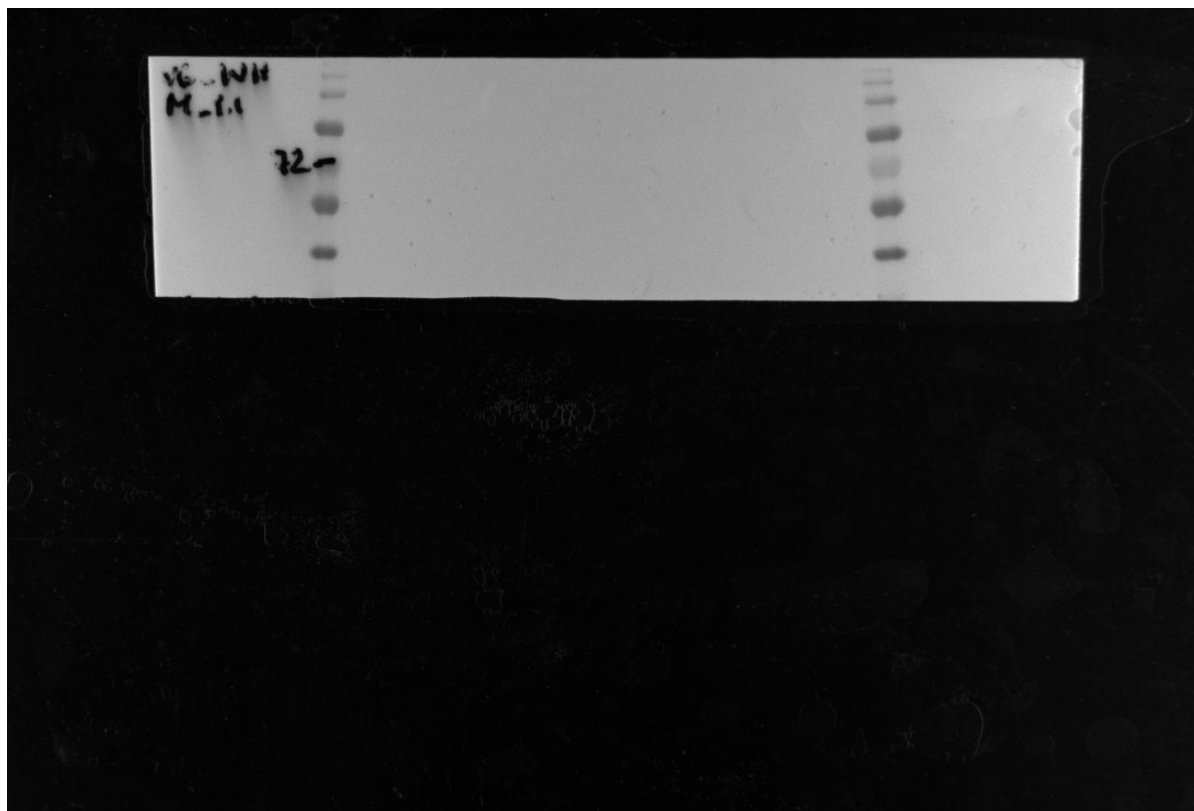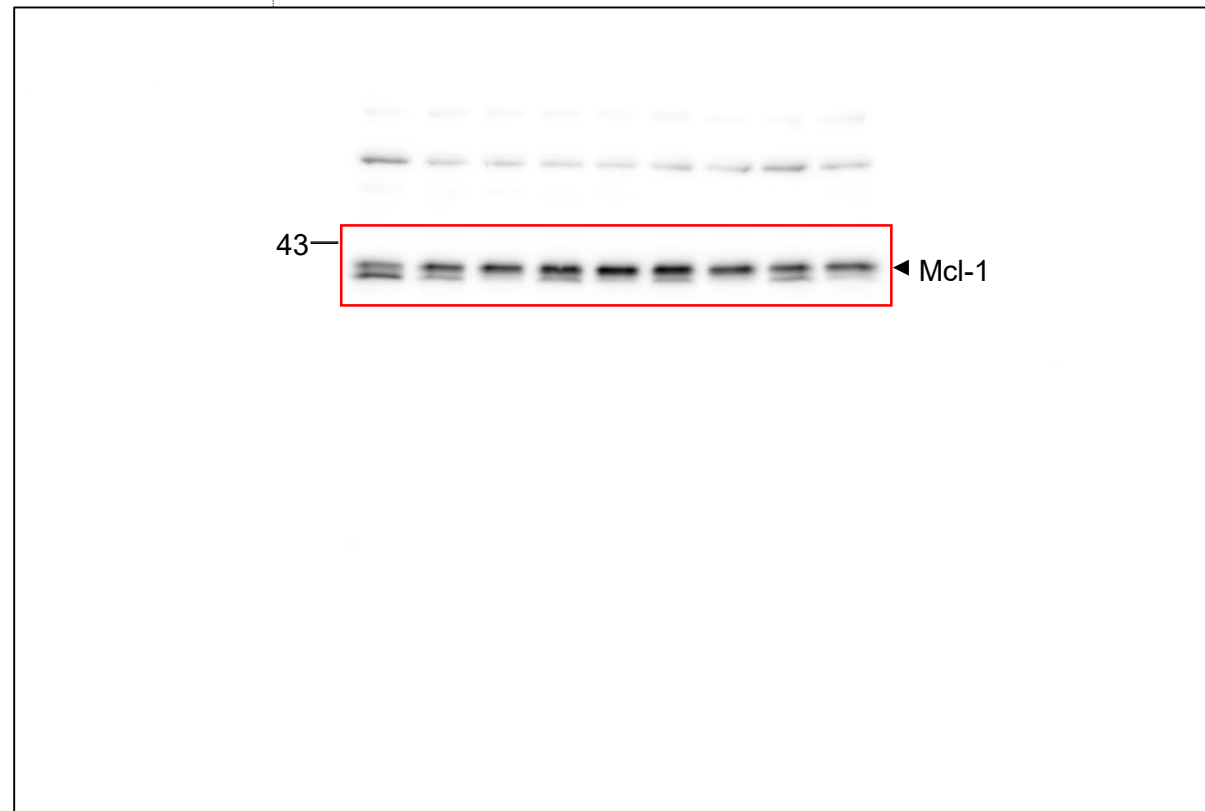

Suppl. Fig. 2 H  
H1299

|  |  | H1299 |   |   |   |   |   |   |   |                    |
|--|--|-------|---|---|---|---|---|---|---|--------------------|
|  |  | -     | + | - | + | - | + | - | + | 15 $\mu$ M ABT-199 |
|  |  | -     | - | + | + | - | - | - | - | 5 nM Bortezomib    |
|  |  | -     | - | - | - | + | + | - | - | 5 nM Carfilzomib   |
|  |  | -     | - | - | - | - | - | + | + | 5 nM Ixazomib      |
|  |  | +     | + | + | + | + | + | + | + | 10 $\mu$ M QVD-OPh |

kDa H1299+p  
53

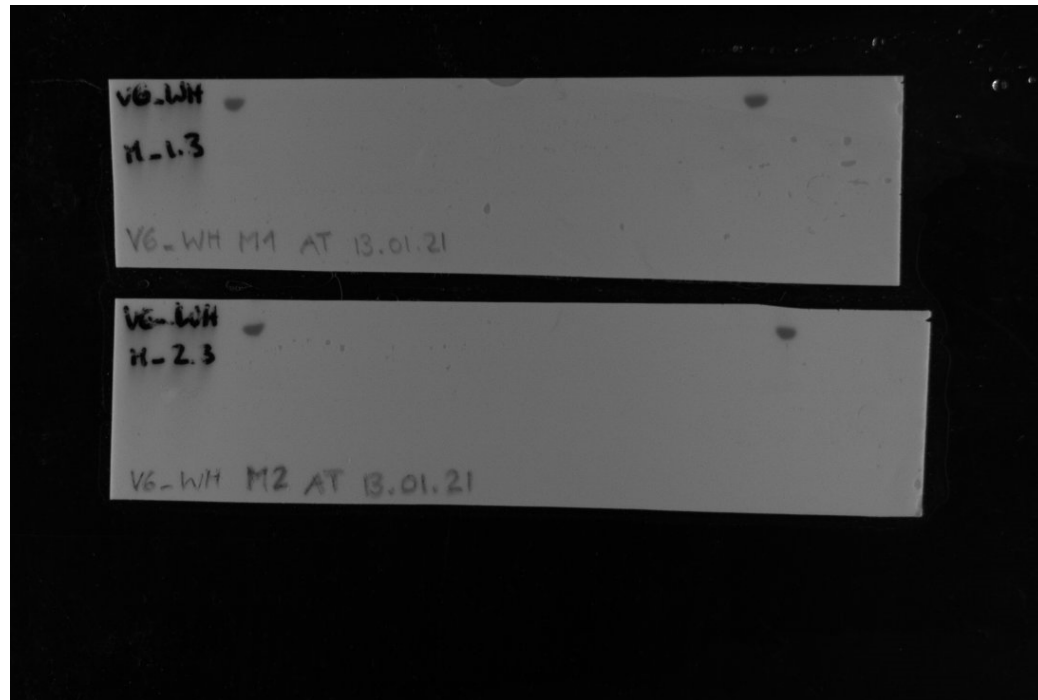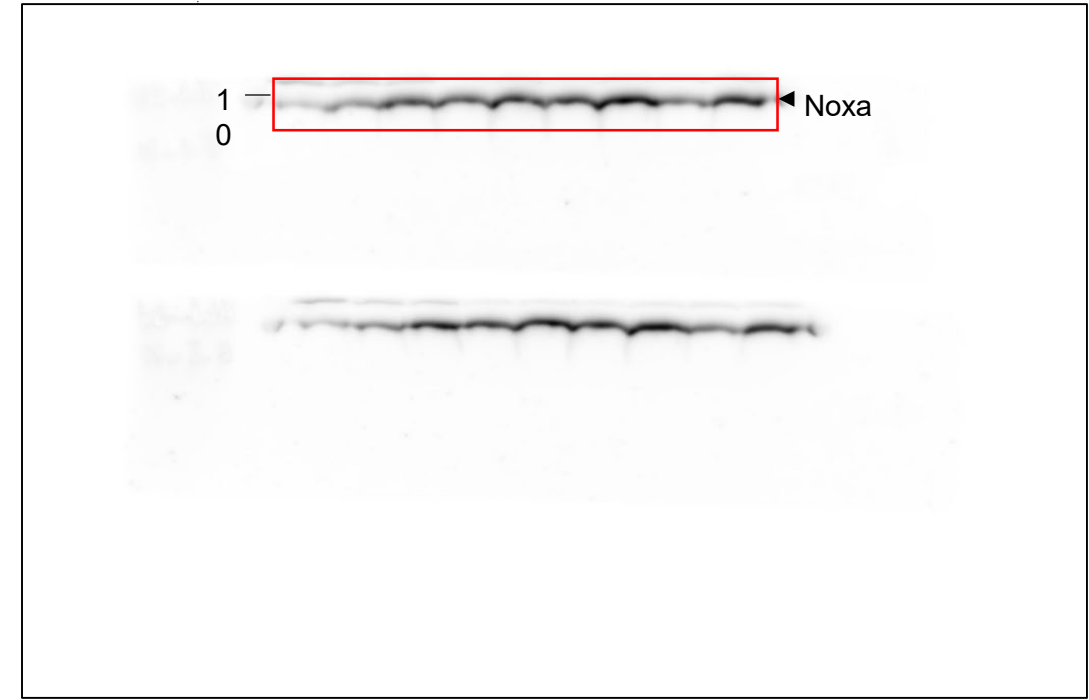

Suppl. Fig. 2 H

H1299

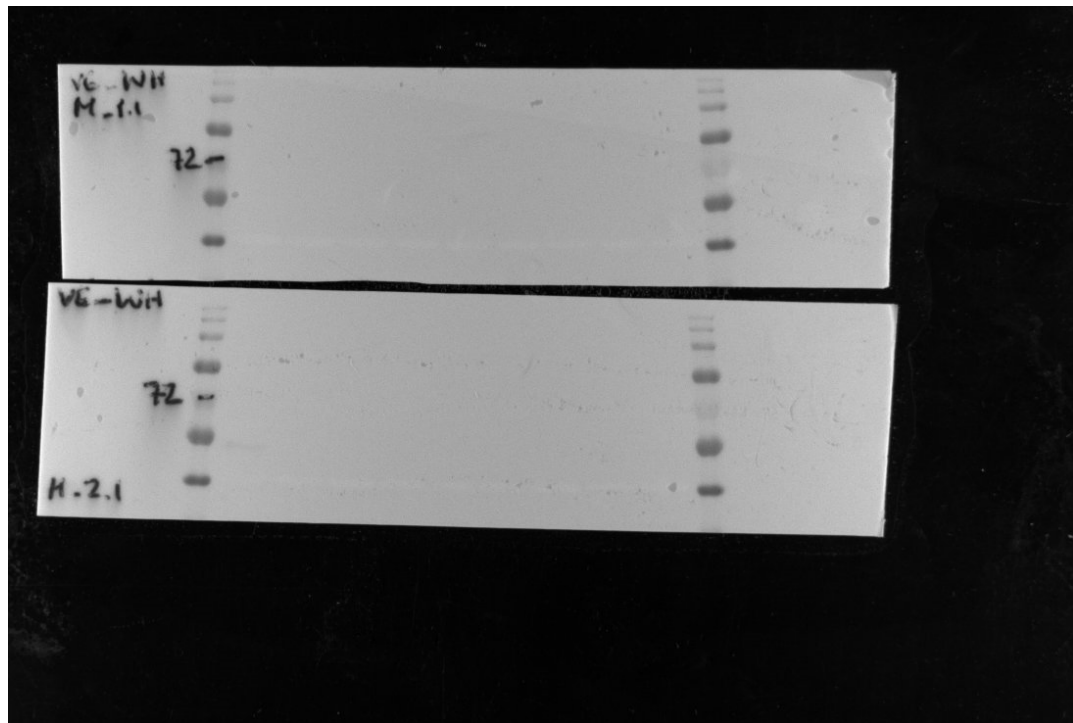

|    |           | H1299 |   |   |   |   |   |   |   |                    |
|----|-----------|-------|---|---|---|---|---|---|---|--------------------|
| kD | H1299+p53 | -     | + | - | + | - | + | - | + | 15 $\mu$ M ABT-199 |
|    |           | -     | - | + | + | - | - | - | - | 5 nM Bortezomib    |
|    |           | -     | - | - | - | + | + | - | - | 5 nM Carfilzomib   |
|    |           | -     | - | - | - | - | - | + | + | 5 nM Ixazomib      |
|    | a         | +     | + | + | + | + | + | + | + | 10 $\mu$ M QVD-OPh |

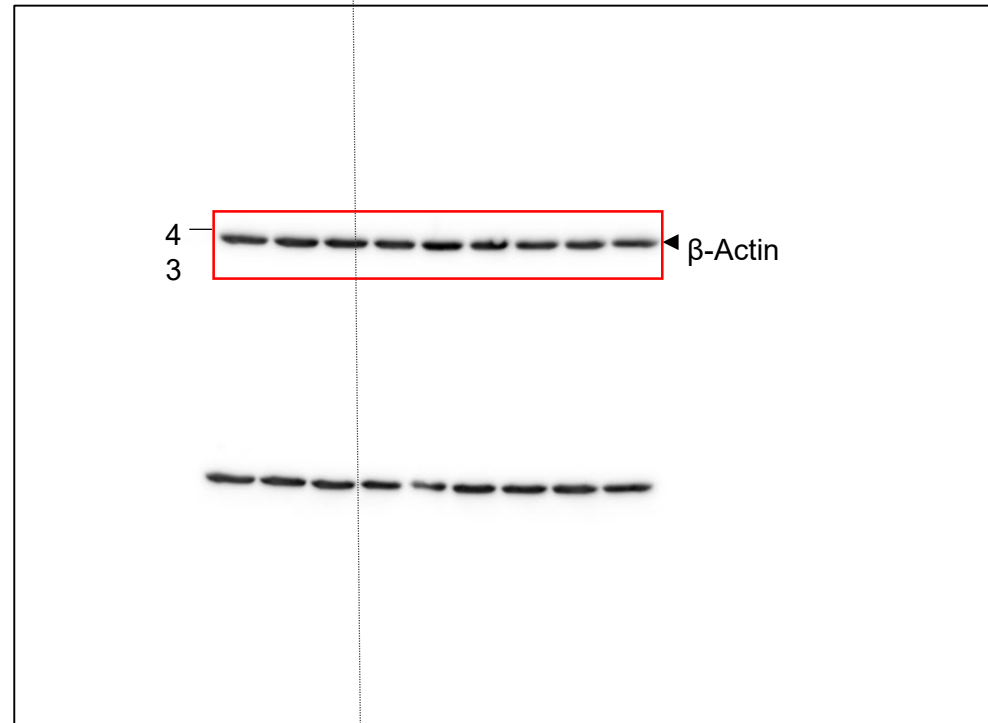



Suppl. Fig. 3 A  
SW982/WT

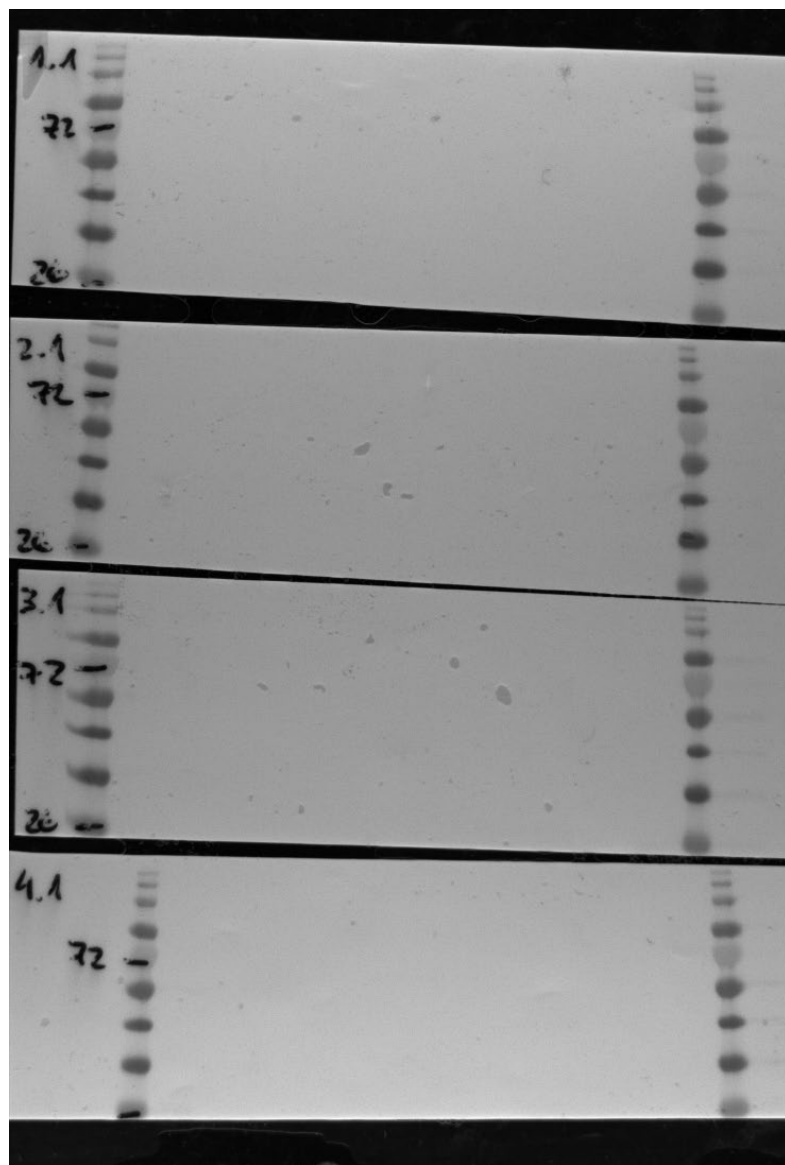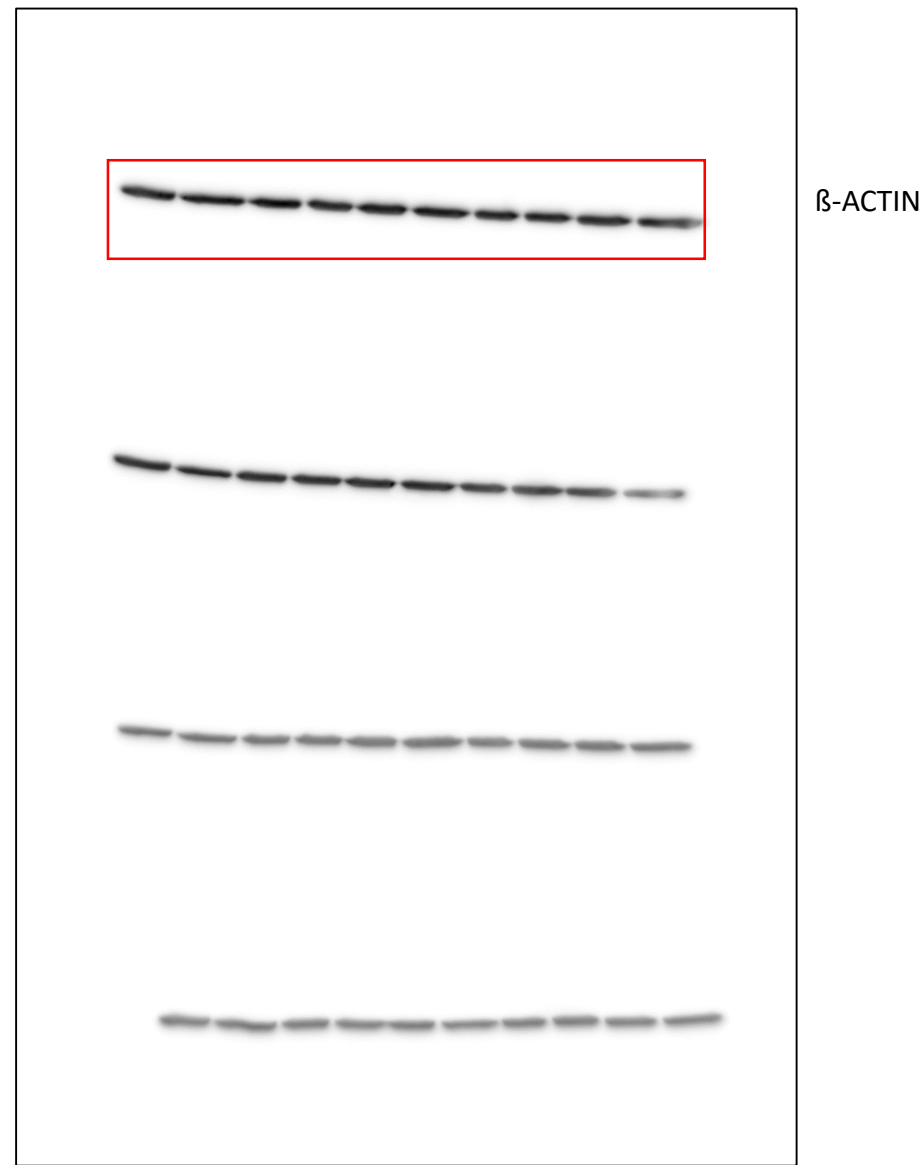

Suppl. Fig. 3 A

SW982/WT

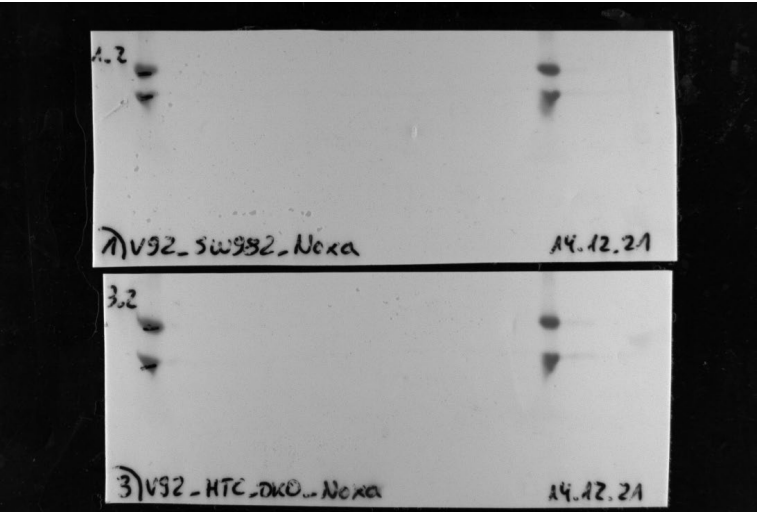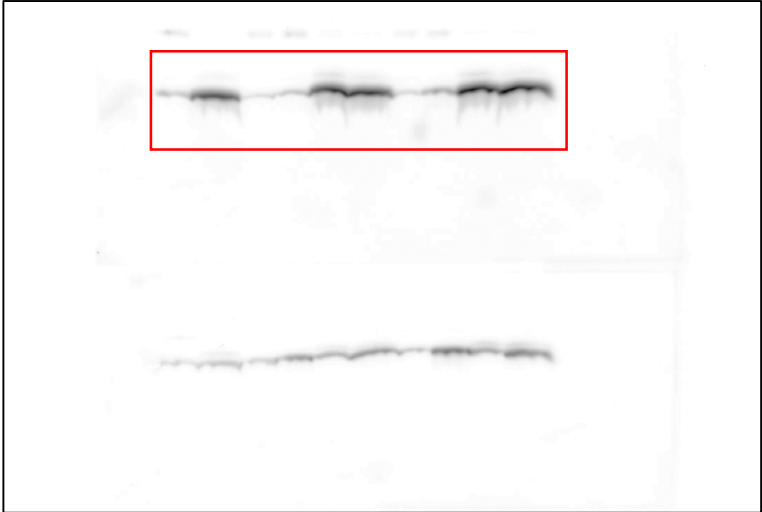

Suppl. Fig. 3 B

SW982/WT

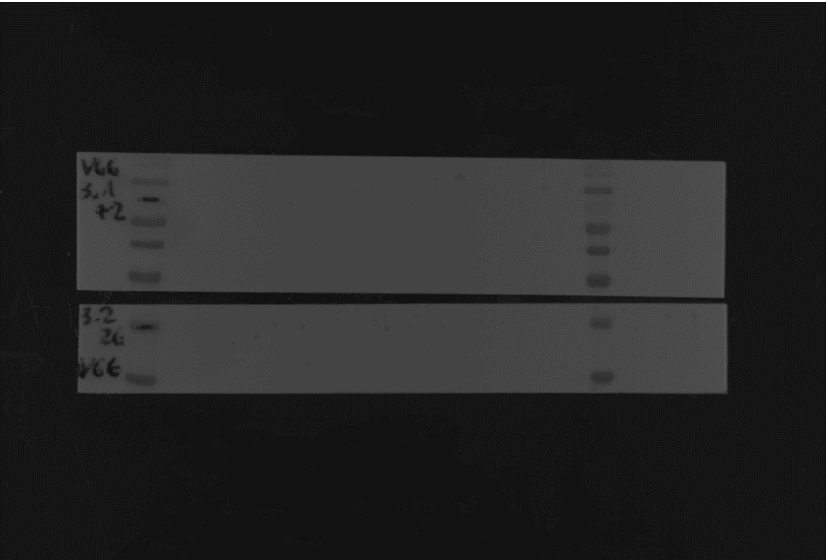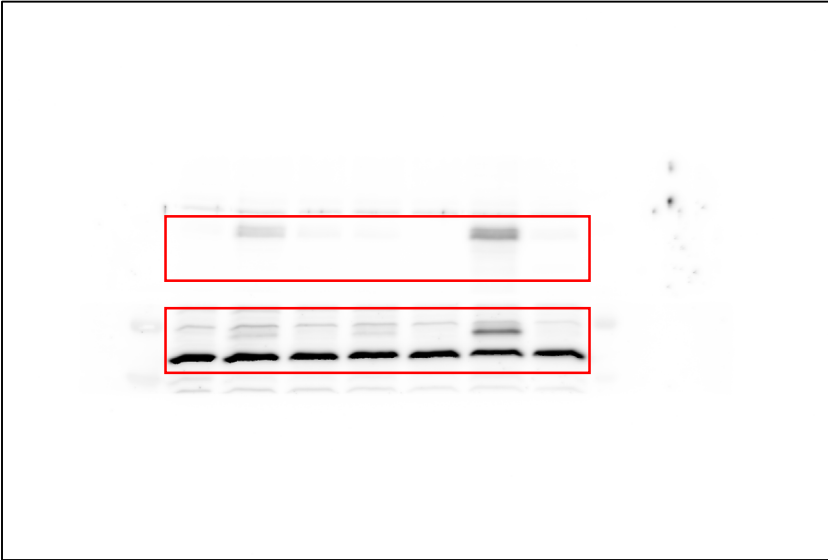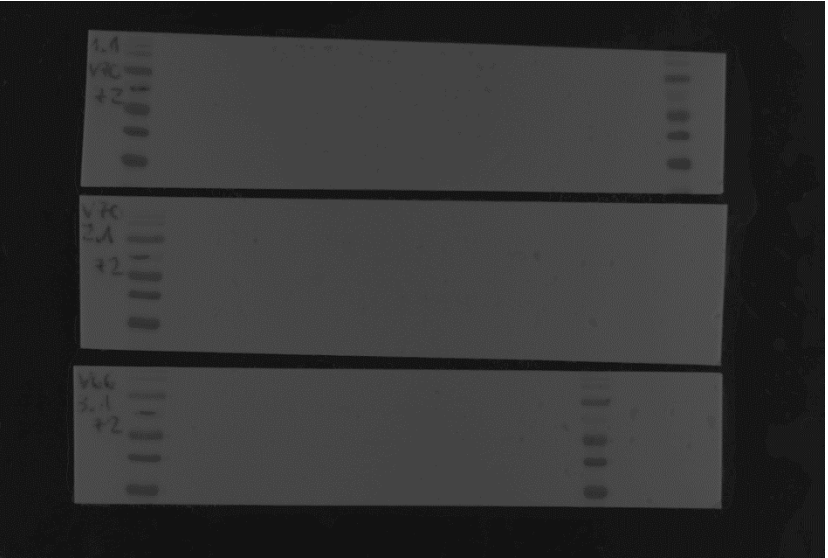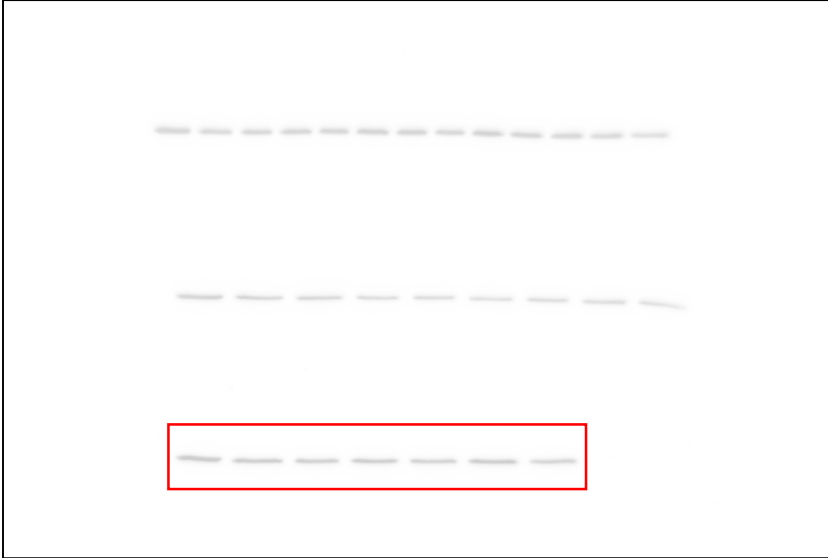

Supplement: 41420_2022_1009_MOESM8_ESM.pdf [file 41420_2022_1009_MOESM8_ESM.pdf]
