# Supplementary material for: The BCL-2 inhibitor ABT-199/venetoclax synergizes with proteasome inhibition via transactivation of the MCL-1 antagonist NOXA
Source: PubMed Central journal article supplement (PMC9021261; doi:10.1038/s41420-022-01009-1), 2022-04-20

# Supplemental Figure 2

**A**

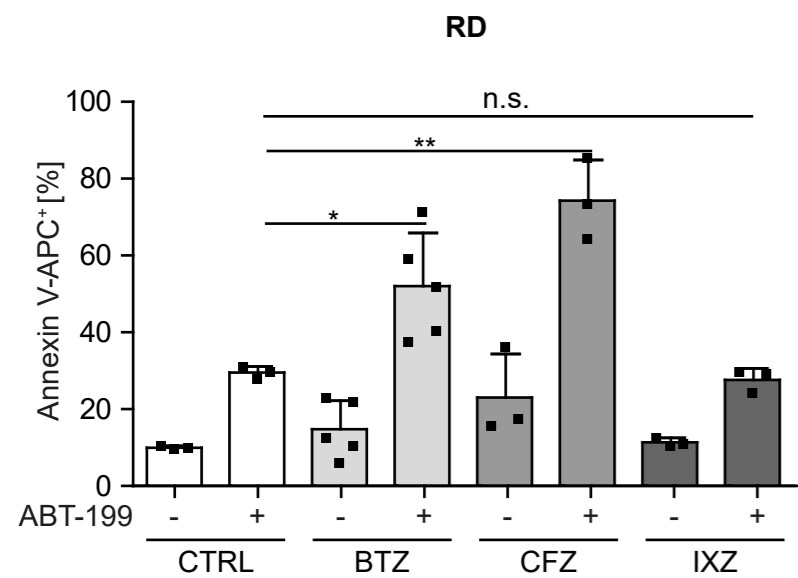

**B**

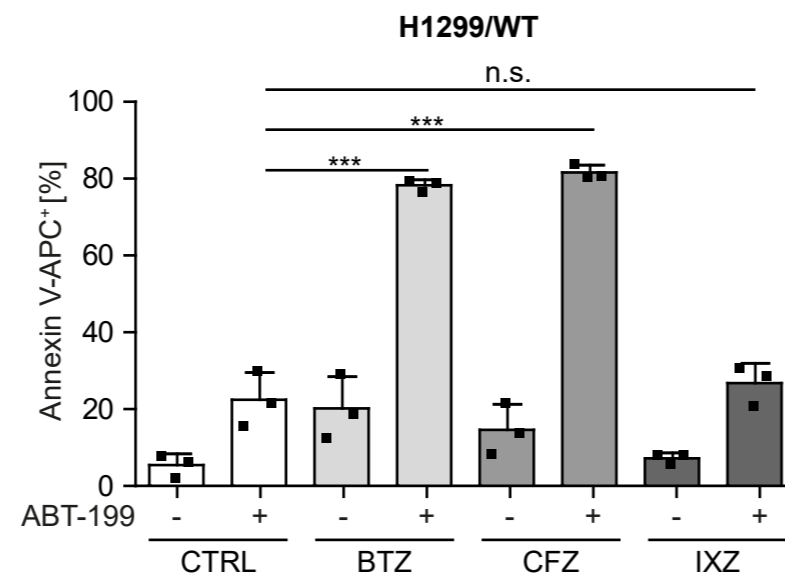

**C**

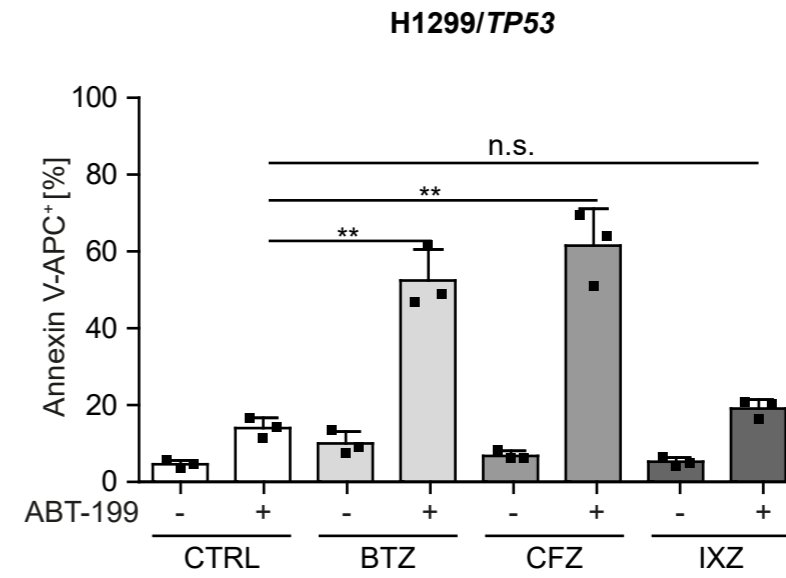

**D**

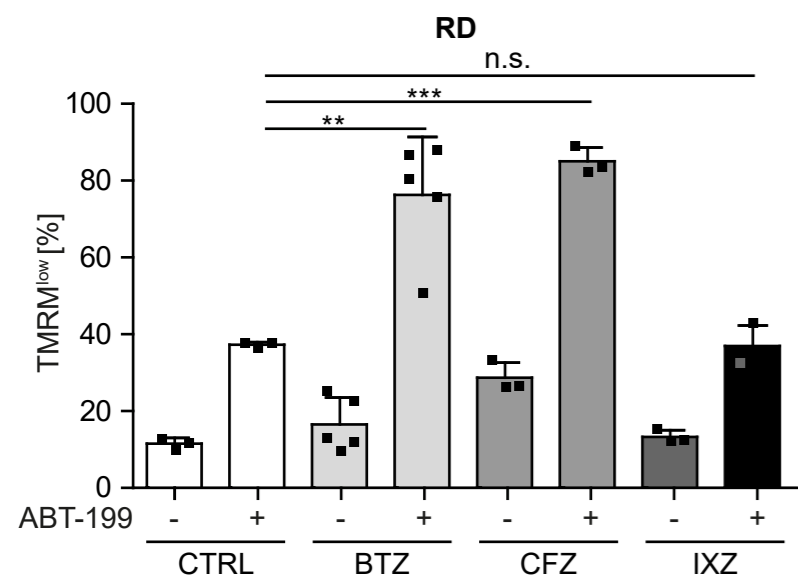

**E**

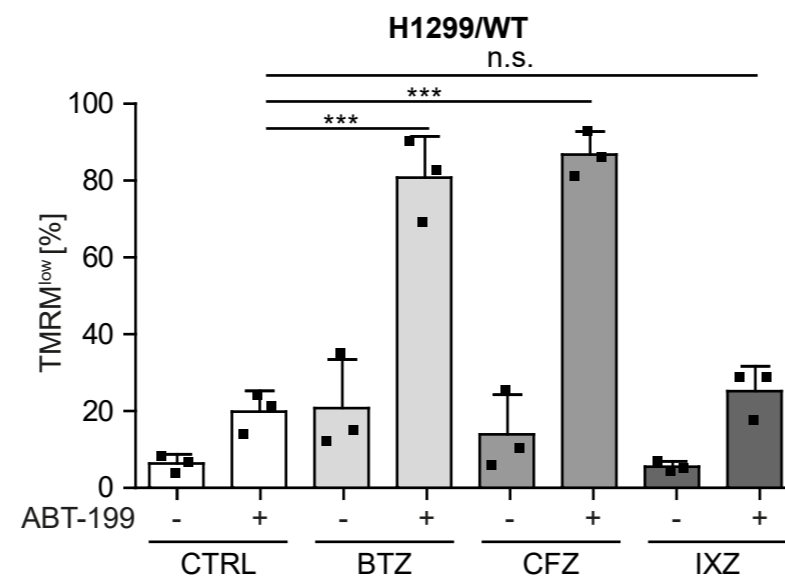

**F**

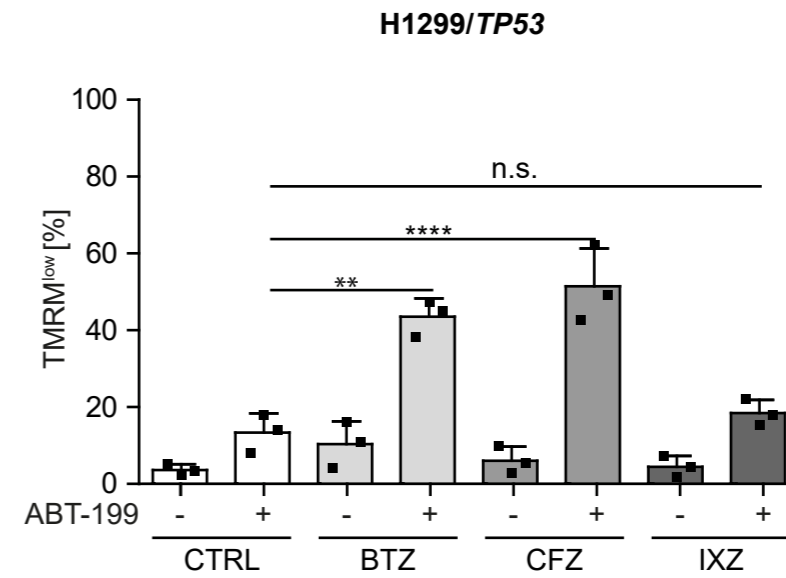

**G**

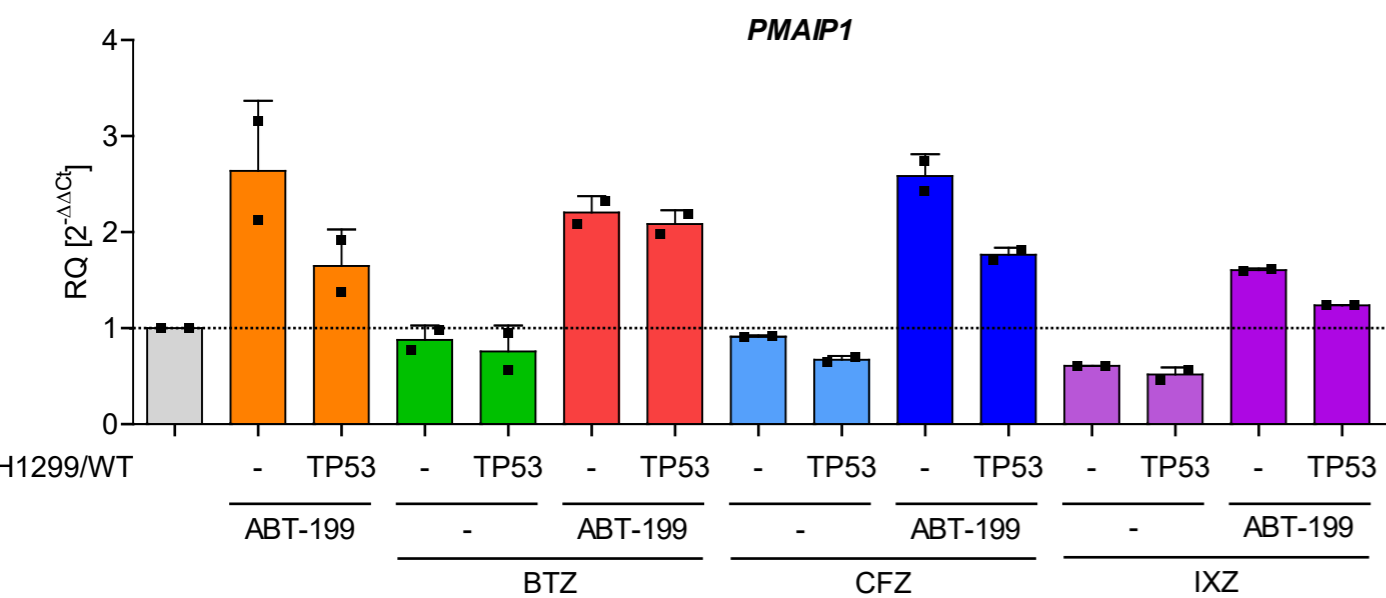

**H**

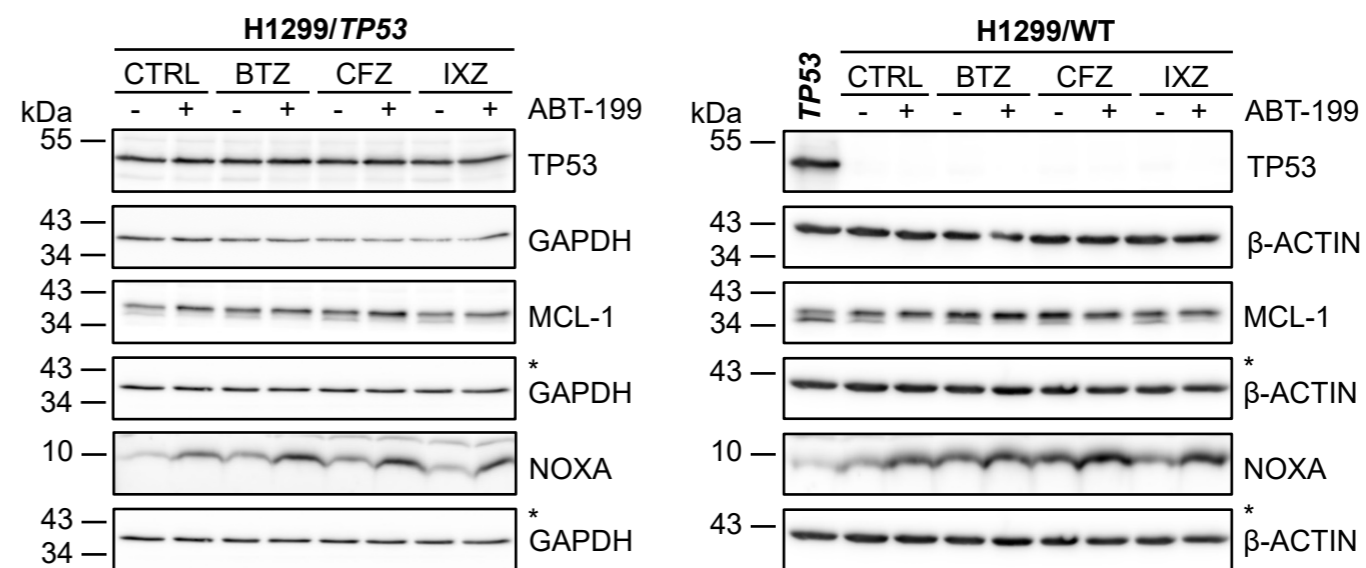

Supplement: 41420_2022_1009_MOESM4_ESM.pdf [file 41420_2022_1009_MOESM4_ESM.pdf]
