# Supplementary material for: The BCL-2 inhibitor ABT-199/venetoclax synergizes with proteasome inhibition via transactivation of the MCL-1 antagonist NOXA
Source: PubMed Central journal article supplement (PMC9021261; doi:10.1038/s41420-022-01009-1), 2022-04-20
Supplement: 41420_2022_1009_MOESM7_ESM.pdf [file 41420_2022_1009_MOESM7_ESM.pdf]

Please complete the table below to indicate the contributions of all named authors to the figures.

Figure 1:

|  |
|--|
|  |
|--|

Figure 2:

|  |
|--|
|  |
|--|

Figure 3:

|  |
|--|
|  |
|--|

Figure 4:

|  |
|--|
|  |
|--|

Figure 5:

|  |
|--|
|  |
|--|

Figure 6:

|  |
|--|
|  |
|--|

Signed for and on behalf of the Author(s):

|                                                                                     |
|-------------------------------------------------------------------------------------|
| 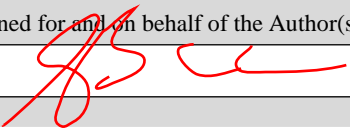 |
|-------------------------------------------------------------------------------------|

Print Name:

|  |
|--|
|  |
|--|

Date:

|  |
|--|
|  |
|--|
